# Supplementary material for: Prevalence of uncontrolled hypertension in people with comorbidities in sub-Saharan Africa: a systematic review and meta-analysis
Source: PubMed Central journal article supplement — BMJ Open. 2021 Dec 13;11(12):e045880. doi: 10.1136/bmjopen-2020-045880 (PMC8671923; doi:10.1136/bmjopen-2020-045880), 2021-12-13
Supplement: bmjopen-2020-045880.draft_revisions.pdf [file bmjopen-2020-045880.draft_revisions.pdf]

# BMJ Open

BMJ Open is committed to open peer review. As part of this commitment we make the peer review history of every article we publish publicly available.

When an article is published we post the peer reviewers' comments and the authors' responses online. We also post the versions of the paper that were used during peer review. These are the versions that the peer review comments apply to.

The versions of the paper that follow are the versions that were submitted during the peer review process. They are not the versions of record or the final published versions. They should not be cited or distributed as the published version of this manuscript.

BMJ Open is an open access journal and the full, final, typeset and author-corrected version of record of the manuscript is available on our site with no access controls, subscription charges or pay-per-view fees (<http://bmjopen.bmj.com>).

If you have any questions on BMJ Open's open peer review process please email [info.bmjopen@bmj.com](mailto:info.bmjopen@bmj.com)

# BMJ Open

## Prevalence of uncontrolled hypertension in people with comorbidities in sub-Saharan Africa: a systematic review and meta-analysis

|                               |                                                                                                                                                                                                                                                                                                                                                                                                                                                                                                                                                                                                                                                                                                                        |
|-------------------------------|------------------------------------------------------------------------------------------------------------------------------------------------------------------------------------------------------------------------------------------------------------------------------------------------------------------------------------------------------------------------------------------------------------------------------------------------------------------------------------------------------------------------------------------------------------------------------------------------------------------------------------------------------------------------------------------------------------------------|
| Journal:                      | <i>BMJ Open</i>                                                                                                                                                                                                                                                                                                                                                                                                                                                                                                                                                                                                                                                                                                        |
| Manuscript ID                 | bmjopen-2020-045880                                                                                                                                                                                                                                                                                                                                                                                                                                                                                                                                                                                                                                                                                                    |
| Article Type:                 | Original research                                                                                                                                                                                                                                                                                                                                                                                                                                                                                                                                                                                                                                                                                                      |
| Date Submitted by the Author: | 18-Oct-2020                                                                                                                                                                                                                                                                                                                                                                                                                                                                                                                                                                                                                                                                                                            |
| Complete List of Authors:     | Mohamed, Shukri; African Population and Health Research Center, Health and Systems for Health; University of Warwick, Academic Unit of Primary Care (AUPC) and the NIHR Global Health Research Unit on Improving Health in Slums, University of Warwick, Coventry, UK<br>Uthman, Olalekan; University of Warwick, Division of Health Sciences<br>Mutua, Martin; African Population and Health Research Center, Research<br>Asiki, G; African Population and Health Research Center<br>Abba, Mustapha; University of Warwick, Academic Unit of Primary Care (AUPC) and the NIHR Global Health Research Unit on Improving Health in Slums, University of Warwick, Coventry, UK<br>Gill, Paramjit ; University of Warwick |
| Keywords:                     | PUBLIC HEALTH, EPIDEMIOLOGY, Hypertension < CARDIOLOGY                                                                                                                                                                                                                                                                                                                                                                                                                                                                                                                                                                                                                                                                 |
|                               |                                                                                                                                                                                                                                                                                                                                                                                                                                                                                                                                                                                                                                                                                                                        |

SCHOLARONE™  
Manuscripts

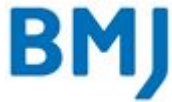

I, the Submitting Author has the right to grant and does grant on behalf of all authors of the Work (as defined in the below author licence), an exclusive licence and/or a non-exclusive licence for contributions from authors who are: i) UK Crown employees; ii) where BMJ has agreed a CC-BY licence shall apply, and/or iii) in accordance with the terms applicable for US Federal Government officers or employees acting as part of their official duties; on a worldwide, perpetual, irrevocable, royalty-free basis to BMJ Publishing Group Ltd ("BMJ") its licensees and where the relevant Journal is co-owned by BMJ to the co-owners of the Journal, to publish the Work in this journal and any other BMJ products and to exploit all rights, as set out in our [licence](#).

The Submitting Author accepts and understands that any supply made under these terms is made by BMJ to the Submitting Author unless you are acting as an employee on behalf of your employer or a postgraduate student of an affiliated institution which is paying any applicable article publishing charge ("APC") for Open Access articles. Where the Submitting Author wishes to make the Work available on an Open Access basis (and intends to pay the relevant APC), the terms of reuse of such Open Access shall be governed by a Creative Commons licence – details of these licences and which [Creative Commons](#) licence will apply to this Work are set out in our licence referred to above.

Other than as permitted in any relevant BMJ Author's Self Archiving Policies, I confirm this Work has not been accepted for publication elsewhere, is not being considered for publication elsewhere and does not duplicate material already published. I confirm all authors consent to publication of this Work and authorise the granting of this licence.

1  
2  
3 **Prevalence of uncontrolled hypertension in people with comorbidities in sub-Saharan**  
4  
5 **Africa: a systematic review and meta-analysis**  
6  
7

8 **Authors:** Shukri F. Mohamed, MPH<sup>1\*,2,3</sup> – Shukri.Mohamed@warwick.ac.uk  
9

10  
11 Olalekan A. Uthman, PhD<sup>4</sup> – olalekan.uthman@warwick.ac.uk  
12

13  
14 Martin K. Mutua, PhD<sup>2</sup> – mkavao@aphrc.org  
15

16  
17 Gershim Asiki, PhD<sup>2</sup> – [gasiki@aphrc.org](mailto:gasiki@aphrc.org)  
18

19  
20 Mustapha S. Abba, MPH<sup>1</sup> – Mustapha.Abba@warwick.ac.uk  
21

22  
23 Paramjit Gill, PhD<sup>1</sup> – P.Gill.1@warwick.ac.uk  
24

25  
26 \*Corresponding author: Shukri F. Mohamed – Shukri.Mohamed@warwick.ac.uk  
27

28  
29 Address: Academic Unit of Primary Care (AUPC) and the NIHR Global Health Research Unit on  
30  
31 Improving Health in Slums, University of Warwick, Coventry, UK  
32

33  
34 Email: [Shukri.Mohamed@warwick.ac.uk](mailto:Shukri.Mohamed@warwick.ac.uk); smohamed@aphrc.org  
35

36  
37 Phone number: +254 713 089457  
38

39  
40 **Author Affiliations**  
41

42  
43 1 Academic Unit of Primary Care (AUPC) and the NIHR Global Health Research Unit on Improving  
44  
45 Health in Slums, University of Warwick, Coventry, UK  
46

47  
48 2 Health and Systems for Health Unit, African Population and Health Research Center (APHRC),  
49  
50 Nairobi, Kenya  
51

52  
53 3 Lown Scholars Program, Department of Global Health and Population, Harvard T.H. Chan School of  
54  
55 Public Health, Boston, MA, USA.  
56

57  
58 4 Warwick-Centre for Applied Health Research and Delivery (WCAHRD), Warwick Medical School,  
59  
60 University of Warwick, Coventry, UK

**Word Count: 3195**

**Abstract**

**Background:** The burden of uncontrolled hypertension in sub-Saharan Africa (SSA) is high and hypertension is known to co-exist with other chronic diseases such as kidney disease, diabetes among others. This is the first systematic review and meta-analysis to determine the burden of uncontrolled hypertension among patients with comorbidities in SSA.

**Methods:** A comprehensive search was conducted on MEDLINE, Excerpta Medica Database (Embase), and Web of Science to identify all relevant articles published between January 1<sup>st</sup>, 2000 and June 15<sup>th</sup>, 2019. We included studies that reported on the prevalence of uncontrolled hypertension among people in SSA who report taking antihypertensive treatment and have another chronic condition. A random-effects meta-analysis was performed to obtain the pooled estimate of the prevalence of uncontrolled hypertension among patients with comorbid conditions while on treatment across studies in SSA.

**Results:** In all 18 articles were included for meta-analyses. Eleven articles were among diabetic patients, three articles among HIV patients, two were among stroke patients while chronic kidney disease and atrial fibrillation had one article each. The pooled prevalence of uncontrolled hypertension among patients with comorbidities was 75.9% (95% CI, 67.9%-83.0%);  $I^2$  96.0%), varying from 66.4% in patients with HIV to 100.0% in patients with atrial fibrillation. Subgroup analysis showed differences in uncontrolled hypertension prevalence by various study-level characteristics.

**Conclusion:** This study suggests a high burden of uncontrolled hypertension in people with comorbidities in SSA. Strategies to improve the control of hypertension among people with comorbidities are needed. PROSPERO registration number CRD42019108218.

Word count – 240

Key word – Uncontrolled hypertension, comorbidities, sub-Saharan Africa

## Strengths and limitations of this study

- A published comprehensive protocol was used to identify all available evidence without language restriction, reporting in accordance with PRISMA guidelines, search using multiple electronic databases, searching grey literature, contacting experts in the field for additional data sources to reduce study selection bias, and heterogeneity test by subgroup analyses and sensitivity analyses.
- Two independent reviewers were used in data extraction and the assessment of the risk of bias.
- The prevalence of uncontrolled hypertension (UHTN) in some comorbidities such as atrial fibrillation and chronic kidney disease were reported in single studies.
- Most of the studies included in the meta-analysis were hospital based studies that used non-random sampling procedures.
- There was substantial heterogeneity between the studies.

## Introduction

Hypertension is an important risk factor for cardiovascular diseases (CVDs) and a leading contributor to death globally (1). An estimated 1.4 billion people have hypertension globally with three quarter (75%) of this population living in low-and –middle-income countries (2, 3). Worldwide trends analysis based on a large dataset from multiple studies conducted between 1975 and 2015 in 200 countries showed no change in global mean blood pressure, but a a substantial downward trend in high income countries and a rise in low and middle income countries (4). Levels of hypertension awareness, treatment and control improved by 2.9% in high income countries while in low-middle-income countries negligible improvement in awareness, treatment, and control were observed (3, 4). Sub-Saharan African (SSA) countries have the highest (30%) prevalence of hypertension in the world (5). In the latest systematic review and meta-analysis on hypertension in SSA, Ataklte et al (5), reported a (93%) high prevalence of uncontrolled hypertension (UHTN).

Hypertension often co-exists with comorbidities such as chronic kidney disease, diabetes, and hypercholesterolemia among others (6-9). These comorbidities could explain part of the inadequacy in blood pressure control. Some studies conducted in Europe and the US found that patients with diabetes mellitus had a significantly increased risk of uncontrolled blood pressure (10, 11). Another study conducted in the UK has shown that achieving optimal blood pressure control in patients with hypertension and type 2 diabetes produces an important decrease in the risks associated with diabetes (12). This study provides evidence that optimal blood pressure control in type 2 diabetes has implications for the management of blood pressure in diabetic patients.

In recent years, public health efforts to promote prevention, awareness and treatment of hypertension in SSA have intensified (13-16) but hypertension control remains low (17-21). Despite several studies conducted on UHTN in people with comorbidities, pooled estimations of the burden are not available for comorbidities such as diabetes, dyslipidaemia, stroke, HIV, obesity, atrial fibrillation. From a clinical perspective, it is important to understand why patients on treatment are

1  
2  
3 not attaining optimal blood control and whether their pre-existing comorbidities contribute to the  
4 lack of control of blood pressure. Therefore, to inform policy, practice and the development of  
5 guidelines for hypertension for integrated care among patients with comorbid conditions, it is critical  
6 to understand the burden of UHTN in people with comorbidities. The purpose of this review is to  
7 summarize the evidence on and estimate the prevalence of UHTN in patients with comorbidities in  
8 SSA and to explore factors associated with UHTN in people with comorbidities .  
9  
10  
11  
12  
13  
14  
15  
16  
17

## 18 **Methods**

### 19 **Protocol and registration**

20  
21  
22 The protocol for this systemic review and meta-analysis was registered on the International  
23 Prospective Register of Systematic Reviews (PROSPERO CRD42019108218) and published (22). The  
24 reporting was done according to the Preferred Reporting Items for Systematic reviews and Meta-  
25 Analyses (PRISMA-P) guidelines (23).  
26  
27  
28  
29  
30  
31  
32

### 33 **Search Strategy**

34  
35 We systematically searched MEDLINE via Ovid, Excerpta Medica Database (Embase), and Web of  
36 Science from January 1<sup>st</sup>, 2000 to June 15<sup>th</sup>, 2019. The search strategy included the following relevant  
37 terms: *uncontrolled hypertension, hypertension, uncontrolled blood pressure, high blood pressure , a*  
38 *list of comorbidities, and sub-Saharan Africa (Detailed search strategy list is attached as supplement*  
39 *(Supplement file S1). Additionally, the reference lists of the included studies were reviewed to identify*  
40 *other relevant studies.*  
41  
42  
43  
44  
45  
46  
47  
48

### 49 **Eligibility criteria**

50  
51 Studies were included if (1) they provided primary data on the prevalence of hypertension in  
52 accordance with the seventh report of the Joint National Committee (JNC7) among those who reported  
53 taking antihypertensive treatment and had a comorbid condition, (2) participants had been diagnosed  
54 with one of the comorbidities of interest – diabetes, dyslipidemia, obesity, chronic kidney disease,  
55  
56  
57  
58  
59  
60



1  
2  
3 stroke or transient ischemic attack, coronary heart disease, heart failure, peripheral vascular disease,  
4 atrial fibrillation, depression and HIV (Table S1), (3) participants were 15 and above years, (4) the study  
5 was published in any language, and (5) the study was conducted in a sub-Saharan Africa. The following  
6 types of study designs were excluded: (1) case studies, commentaries, editorials, letters, qualitative  
7 studies, and systematic reviews; (2) studies that included hypertension prevalence but did not report  
8 on the prevalence of hypertension among those on antihypertensive medication; and (3) studies of  
9 pregnancy-related hypertension and secondary hypertension.  
10  
11  
12  
13  
14  
15  
16  
17  
18

### 19 **Study selection**

20  
21  
22 Two researchers independently screened the titles and abstracts (SFM & ASM). Two researchers (SFM  
23 & ASM) also assessed full-text reviews of the articles independently for final inclusion. The reference  
24 lists of potentially relevant publications were manually searched for additional publications.  
25 Disagreements were resolved by consensus. For multi-national studies, data were separated to show  
26 the estimate at the country level.  
27  
28  
29  
30  
31  
32  
33

### 34 **Data items and collection process**

35  
36  
37 SFM and ASM independently screened the full texts of included studies. SFM extracted data from the  
38 selected studies, and ASM checked the data for accuracy. A standardized data extraction table was  
39 created (Table 1) and included the following data from all eligible articles: first author name, year of  
40 publication, language, country of the study, study design, sample size, study period, study setting,  
41 sampling method, the timing of data collection, data source, use of comorbidity specific hypertension  
42 control cutoff, male proportion, age of participants (mean or median), type of comorbidity (diabetes,  
43 stroke, HIV, chronic kidney disease, atrial fibrillation), and main outcome of interest uncontrolled  
44 hypertension proportion or the data to compute it.  
45  
46  
47  
48  
49  
50  
51  
52  
53  
54

### 55 **Risk of bias in individual studies**

1  
2  
3 A tool developed by Hoy et.al (24) for prevalence studies was adapted and used to assess the  
4 methodological quality of included studies by evaluating the extent to which they addressed bias in 9  
5 areas of internal and external validity (Table S2). Each of the nine areas was scored one if yes (high  
6 quality) and zero if no (poor quality), and a total quality score was calculated by summing the  
7 individual scores. Total scores ranged from 0 to 9, with higher scores indicating higher quality. Studies  
8 were then classified as having a low (>8), moderate (6–8), or high ( $\leq 5$ ) risk of bias. Two researchers  
9 (SFM and MKM) independently assessed each of the included publications and disagreements was  
10 resolved through discussion.  
11  
12  
13  
14  
15  
16  
17  
18  
19  
20  
21

### 22 **Patient and Public Involvement**

23  
24 This research was done without patient involvement. There was no involvement of patients or  
25 members of the public in the design, or conduct, or reporting, or dissemination plans of this  
26 research.  
27  
28  
29  
30  
31

### 32 **Synthesis of results**

33  
34 The statistical approach used in this meta-analysis followed the study protocol (22). Crude numerators  
35 and denominators from the individual studies were used to recalculate the study-specific unadjusted  
36 prevalence estimates. Variances of the study-specific estimates were stabilized using the double  
37 arcsine transformation to minimise the effect of studies with very small or very large prevalence  
38 estimates on the overall estimate (16) and then a random-effects meta-analysis was performed (17)  
39 to determine the pooled estimate of the prevalence of UHTN among patients with comorbidities  
40 overall and also among people with diabetes, HIV and stroke separately while on antihypertensive  
41 treatment across the included studies in SSA. Prevalence estimates were also summarised by  
42 comorbidities, publication year, sample size, study setting, sampling, risk of bias, gender  
43 proportion, mean age and geographic regions.  
44  
45  
46  
47  
48  
49  
50  
51  
52  
53  
54  
55  
56  
57  
58  
59  
60

1  
2  
3 Heterogeneity was explored using Cochrane's Q and quantified by  $I^2$  statistics (25, 26). Subgroup  
4 analyses were performed based on the following; mean age, gender proportion of participants,  
5 patient comorbidities, study design, study setting, sample size, use of recommended comorbidity  
6 specific blood pressure control cut-offs, countries, regions (Eastern, Western, Central, and Southern  
7 Africa), and by Gross National Income (GNI) were performed to identify the possible sources of  
8 heterogeneity. Sensitivity analyses were performed to assess the robustness of the findings by  
9 excluding studies with a high risk of bias.

10  
11  
12  
13  
14  
15  
16  
17  
18  
19 Funnel plots and Egger asymmetry test were used to assess publication bias, with  $P < .10$  considered  
20 to be statistically significant for publication bias (27). Inter-rater agreements between the researchers  
21 involved in study inclusion and those involved in the identification of risk of bias were assessed using  
22  $\kappa$  Cohen's coefficient (20).

23  
24  
25  
26  
27  
28  
29 All analyses were performed using 'metaprop' routine using StataSE version 16 (StataCorp LLC).

## 30 31 32 33 Results

### 34 35 Study selection

36  
37 From the electronic database search, 7365 records were identified. An additional 35 articles were  
38 identified through reference tracing and from other sources. After duplicate removal, 4776 remained  
39 for the title and abstract screening. After screening, we found 4267 records to be irrelevant and  
40 excluded them. The full texts of 509 articles and reports were retrieved and assessed for eligibility,  
41 resulting in the inclusion of 18 studies for the meta-analysis (figure 1). The inter-rater agreement for  
42 study selection was 0.77.

### 43 44 45 46 47 48 49 50 Study characteristics

51  
52  
53 Table 1 and Table S3 provide detailed information on the included studies. In total, 3,469 participants  
54 were included across 18 studies. Most of the studies were cross-sectional (17, 94%), in English (17,  
55 94%), hospital-based (11, 52%), used consecutive sampling (14, 78%), and prospectively collected data  
56 (12, 67%). The mean (SD) participant age from the 18 studies (28-45) providing this information was  
57  
58  
59  
60

1  
2  
3 56.7 (0.11) years. Study sample sizes ranged from 35 to 567 participants. The proportion of male  
4  
5 participants in the included studies was reported in all studies and it ranged from 25.5% to 60.9% (28-  
6  
7 45). Of the included studies, 11 (29-31, 33, 34, 38-42, 45) reported on diabetes, three (32, 35, 37, 43)  
8  
9 reported on HIV, two (28, 44) reported on stroke, and one each reported on chronic kidney disease  
10  
11 (32) and atrial fibrillation (36). None of the included studies reported on obesity, dyslipidaemia,  
12  
13 coronary heart disease, heart failure, peripheral heart disease, and depression.  
14  
15  
16  
17  
18  
19  
20  
21  
22  
23  
24  
25  
26  
27  
28  
29  
30  
31  
32  
33  
34  
35  
36  
37  
38  
39  
40  
41  
42  
43  
44  
45  
46  
47  
48  
49  
50  
51  
52  
53  
54  
55  
56  
57  
58  
59  
60

For peer review only

Table 1: Characteristics of the Included Studies

| Study                         | Country      | Age<br>(Mean/Median) | Study period        | Study site    | Sampling    | Male<br>% | Sample<br>size | UHTN% | Risk of<br>bias |
|-------------------------------|--------------|----------------------|---------------------|---------------|-------------|-----------|----------------|-------|-----------------|
| <b>Atrial Fibrillation</b>    |              |                      |                     |               |             |           |                |       |                 |
| Jardine et.al,2014            | South Africa | 67±13                | Feb 2010 - Mar 2011 | Health center | Consecutive | 59.9      | 198            | 100.0 | High            |
| <b>Chronic Kidney Disease</b> |              |                      |                     |               |             |           |                |       |                 |
| Babua et.al 2015              | Uganda       | 42.8                 | Jun - Feb 2013      | Hospital      | Consecutive | 51.2      | 191            | 76.0  | Low             |
| <b>Diabetes</b>               |              |                      |                     |               |             |           |                |       |                 |
| Abera et.al, 2016             | Ethiopia     | 56.3±10              | Aug - Jan 2015      | Hospital      | Consecutive | 59.9      | 382            | 85.0  | Low             |
| Adeniyi et.al, 2016           | South Africa | 61.3±11.8            | Jul to Nov 2013     | Hospital      | Consecutive | 28.3      | 265            | 75.5  | Low             |
| Agaba et.al, 2009             | Nigeria      | 51±12                | Jun - Sept 2004     | Hospital      | Consecutive | 40.2      | 79             | 70.9  | Moderate        |
| Choukem et.al 2006            | Cameroon     | 56.6±13.3            | 6 months            | Hospital      | Consecutive | 50.5      | 98             | 79.6  | Low             |
| Cohen et.al, 2010             | Malawi       | 53.2±14.0            | Mar - Jun 2007      | Hospital      | Consecutive | 39.8      | 253            | 72.7  | Low             |
| Mwita et.al, 2012             | Tanzania     | 51.6±11.2            | Feb - Sep 2010      | Health center | Consecutive | 38.0      | 67             | 66.0  | Low             |
| Pinchevsky et.al, 2017        | South Africa | 53.9±11.5            | May - Aug 2015      | Health center | Consecutive | 46.1      | 459            | 78.0  | Low             |
| Pinchevsky et.al, 2013        | South Africa | 63 ± 11.9            | July 2008-2009      | Hospital      | Random      | 44.6      | 567            | 54.2  | Low             |
| Rotchford,2002                | South Africa | 56.5±10.4            | 2 months in 1999    | Hospital      | Consecutive | 26.9      | 129            | 86.0  | Low             |
| Soetedjo et.al 2018           | South Africa | 53±9.9               | Dec 2013 - Jun 2016 | Health center | Consecutive | 35.9      | 48             | 66.7  | Low             |
| Yameogo et.al,2012            | Senegal      | 58.2±9.2             | Mar 2007 - Jul 2008 | Hospital      | NR          | 25.5      | 52             | 80.8  | High            |
| <b>HIV</b>                    |              |                      |                     |               |             |           |                |       |                 |
| Hyle et.al, 2019              | South Africa | 38.4±8.3             | 2015                | Health center | Consecutive | 33.0      | 54             | 83.0  | Low             |
| Muddu et.al, 2019             | Uganda       | 43.6±11.5            | Jan 2014 - Jan 2017 | Health center | Consecutive | 39.4      | 91             | 41.8  | Low             |
| Steffen et.al, 2017           | Malawi       | 36±9.3               | Not indicated       | Health center | NR          | 42.8      | 35             | 77.1  | Moderate        |
| <b>Stroke</b>                 |              |                      |                     |               |             |           |                |       |                 |
| Abboud et.al, 2013            | South Africa | 63.5±11.3            | Jan 2007 - Dec 2008 | Hospital      | Random      | 58.5      | 217            | 88.0  | Low             |
| Wahab et.al, 2017             | Nigeria      | 59±13.1              | Feb 2009 - Apr 2011 | Hospital      | Consecutive | 60.9      | 284            | 60.2  | Low             |

NR=Not reported

### Risk of Bias Assessment

The risk of bias was assessed in all included studies of the 18 included studies. Most studies were categorized as having some concern for bias with two (11.1%) (36, 45) studies being deemed to have high risk of bias. Two studies (31, 43) (11.1%) had a moderate risk of bias while 14 studies (28-30, 32-35, 37-42, 44) (77.8%) had a low risk of bias. The inter-rater agreement for the risk of bias assessment was 0.65. Additional details on the domains assessed are included in the risk of bias summary table in the supplement (Table S2).

### Prevalence of uncontrolled hypertension among patients with comorbidities

Eighteen publications reported on uncontrolled hypertension among patients with comorbidities (Table 1). The majority of the studies were from South Africa (8, 44.4%) (28, 30, 35, 36, 39-42). Uganda (32, 37), Nigeria (31, 44), and Malawi (34, 43) had two (11.1%) studies each while Ethiopia (29), Tanzania (38), and Senegal (45) had one study (5.6%) each. The reported prevalence of UHTN among people with comorbidities ranged from 41.8% (95% CI, 32.2%-52.0%) in Uganda to 100.0% (95% CI, 98.1%-100.0%) in South Africa. The pooled uncontrolled hypertension prevalence estimate in patients with comorbidities from the random-effects meta-analysis was 75.9% (95% CI, 67.9%-83.0%). Substantial heterogeneity ( $I^2 = 96.1\%$ ;  $P < .0001$ ) existed in the included studies (Table 2). Absence of publication bias is suggested by the symmetrical visual inspection of the funnel plot, confirmed by the Egger's test ( $P < .001$ ) (Figure 2).

Table 2: Meta-analysis results for the prevalence of uncontrolled hypertension in people with comorbidities in sub-Saharan Africa

|                        | Prevalence<br>(95%CI) | No of<br>studies | Number of<br>Participants | $I^2$<br>(95%CI) | $p$ <sub>heterogeneity</sub> |
|------------------------|-----------------------|------------------|---------------------------|------------------|------------------------------|
| Overall                | 75.9 (67.9-83.0)      | 18               | 3469                      | 96.1             | <0.0001                      |
| By comorbidity         |                       |                  |                           |                  |                              |
| Atrial fibrillation    | 100.0 (98.1-100.0)    | 1                | 198                       | -                | -                            |
| Chronic kidney disease | 75.9 (69.4-81.4)      | 1                | 191                       | -                | -                            |
| Diabetes               | 74.5 (67.1-81.3)      | 11               | 2399                      | 93.1             | <0.001                       |
| HIV                    | 66.2 (38.3-89.3)      | 3                | 180                       | -                | -                            |

|    |                             |                            |    |      |      |        |
|----|-----------------------------|----------------------------|----|------|------|--------|
| 1  |                             |                            |    |      |      |        |
| 2  |                             |                            |    |      |      |        |
| 3  | Stroke                      | 73.1 (69.1-76.9)           | 2  | 501  | -    | -      |
| 4  | By region                   |                            |    |      |      |        |
| 5  | Eastern                     | 68.4 (49.7-84.4)           | 4  | 731  | 95.6 | <0.001 |
| 6  | Western                     | 69.8 (57.0-81.2)           | 3  | 415  | -    | -      |
| 7  | Central                     | 79.6 (70.6-86.4)           | 1  | 98   | -    | -      |
| 8  | Southern                    | 79.8 (68.1-89.4)           | 10 | 2225 | 97.3 | <0.001 |
| 9  | By risk of bias             |                            |    |      |      |        |
| 10 | Low                         | 72.9 (65.7-79.5)           | 14 | 3105 | 94.5 | <0.001 |
| 11 | Moderate                    | 72.0 (63.3-80.0)           | 2  | 114  | -    | -      |
| 12 | High                        | 99.0 (97.1-100.0)          | 2  | 250  | -    | -      |
| 13 | By study size               |                            |    |      |      |        |
| 14 | Small studies               | 70.4 (60.1-79.8)           | 8  | 524  | 83.4 | <0.001 |
| 15 | Large studies               | 79.5 (69.0-83.0)           | 10 | 2945 | 97.7 | <0.001 |
| 16 | By period of publication    |                            |    |      |      |        |
| 17 | Before 2015                 | 79.4 (66.5-89.9)           | 10 | 1851 | 97.3 | <0.001 |
| 18 | After 2015                  | 71.1 (61.6-79.8)           | 8  | 1618 | 93.1 | <0.001 |
| 19 | By gender proportion        |                            |    |      |      |        |
| 20 | More females                | 71.0 (63.3-78.1)           | 12 | 2099 | 91.9 | <0.001 |
| 21 | More males                  | 84.1 (69.5-94.7)           | 6  | 1370 | 97.6 | <0.001 |
| 22 | By sampling                 |                            |    |      |      |        |
| 23 | Consecutive                 | 76.1 (67.6-83.7)           | 14 | 2598 | 95.6 | <0.001 |
| 24 | Random                      | 64.5 (61.1-67.9)           | 2  | 784  | -    | -      |
| 25 | By setting                  |                            |    |      |      |        |
| 26 | Hospital                    | 75.5 (67.7-82.3)           | 11 | 2517 | 94.7 | <0.001 |
| 27 | Health center               | 76.0 (55.7-91.6)           | 7  | 952  | 97.3 | <0.001 |
| 28 | By comorbidity HTN target   |                            |    |      |      |        |
| 29 | Comorbidity target used     | 70.7 (61.3-79.2)           | 11 | 1735 | 93.3 | <0.001 |
| 30 | Comorbidity target not used | 83.0 (72.4-91.4)           | 7  | 1734 | 96.3 | <0.001 |
| 31 | By Gross National Income    |                            |    |      |      |        |
| 32 | Below SSA Average           | 72.7 (63.4-81.0)           | 8  | 1169 | 97.5 | <0.001 |
| 33 | Above SSA average           | 78.3 (66.1-88.4)           | 10 | 2300 | 90.2 | <0.001 |
| 34 | SSA=sub-Saharan Africa      | <b>I<sup>2</sup>=0.623</b> |    |      |      |        |

Subgroup analysis revealed differences in uncontrolled hypertension prevalence by comorbidity (Figure 3). Adults with atrial fibrillation reported the highest uncontrolled hypertension estimate (100.0% [95% CI, 98.1%- 100.0%]), followed by adults with chronic kidney disease (75.9% [95% CI, 69.4%-81.4%]). The lowest pooled uncontrolled hypertension prevalence estimate was found in adults with HIV (66.2% [95% CI, 38.3%-89.3%]). Pooled UHTN prevalence differed by geographic regions; studies conducted in the Southern and Central region reported higher prevalence's (79.8% [95% CI,

68.2%-89.3%]) and (79.6% [95% CI, 70.6%-86.4%]) respectively than studies conducted in Eastern and Western regions (68.4% [95% CI, 49.7%-84.4%]) and (69.8% [95% CI, 57.0%-81.2%]) respectively. Prevalence varied by sample size; large studies reported a higher prevalence (79.5% [95% CI, 69.1%-88.2%]) compared to small studies (70.4% [95% CI, 60.1%-79.8%]) (table 2). Studies that used the recommended hypertension control value for each comorbidity reported lower pooled prevalence of uncontrolled hypertension (70.1 [95% CI, 57.4-81.5]) compared to those that did not use the recommended comorbidity specific blood pressure control value (78.2 [95% CI, 73.1-82.9]). Studies that had below the average SSA GNI reported a lower prevalence of UHTN (72.7 [95% CI, 63.4-81.0]) compared to studies above the average SSA GNI (78.3 [95% CI, 66.1-88.4]).

The univariable analysis of the UHTN prevalence association with comorbidities explained 14.4% of the heterogeneity (Table S4). The use of the recommended comorbidity specific blood pressure control explained 26.6% of the heterogeneity but this was only marginally significant at 10%. The multivariable meta-regression analysis, comorbidities and the recommended hypertension control value for each comorbidity explained 32.4% of the 96.1% residual heterogeneity. However, the differences noted in the final multivariable meta-regression were not statistically significant.

Sensitivity analysis done by excluding studies with high risk of bias from the analysis did not show any influence on the robustness of the findings in the pooled analysis.

### **Prevalence of uncontrolled hypertension among patients with diabetes**

The prevalence of uncontrolled hypertension prevalence estimate among patients with diabetes was reported in 11 studies (29-31, 33, 34, 38-42, 45), with a total of 2399 participants. Uncontrolled hypertension prevalence in this group ranged from 54% (95% CI, 50%- 58%) to 85% (95% CI, 78%-90%), with a pooled estimate of 74.5% (95% CI, 67.1%-81.3%) (Table 2). Substantial heterogeneity ( $I^2 = 93.1\%$ ;  $P < .001$ ) was observed in the included studies (Figure 2). Publication bias was not evident from the visual inspection of the funnel plot (Figure 4).



Subgroup analysis revealed differences in uncontrolled hypertension prevalence among people with diabetes. Table 3). There were differences noted by sample size; large studies reported a higher prevalence (75.5% [95% CI, 67.1%-81.3%]) compared to small studies (73.3% [95% CI, 68.2%-79.3%]) (table 2). Pooled UHTN prevalence differed by geographic regions; studies conducted in the Eastern reported the highest pooled prevalence (82.5% [95% CI, 80.4%-87.1%]) while studies in conducted in the Southern region reported the lowest pooled prevalence (72.5% [95% CI, 62.0%-81.8%]). Gender differences were also noted; studies with more male participants had higher pooled prevalence (72.5% [95% CI, 64.4%-79.9%]) compared to studies with more female participants. Studies conducted after 2015 had higher pooled prevalence of UHTN among people with diabetes compared to studies conducted before 2015. Studies that used the recommended diabetes hypertension cutoff (BP<130/85 mmHg) to define blood pressure control reported lower UHTN prevalences compared to those that did not use the recommended hypertension control value. Studies that had below the average SSA GNI reported a higher prevalence of UHTN (77.3 [95% CI, 69.7-84.2]) compared to studies with above the average SSA GNI (72.3 [95% CI, 61.0-82.3]).

In the univariable analysis, the use of the recommended hypertension control value for diabetes explained the most of the heterogeneity (56.7%) observed while sampling explained 100% of the heterogeneity (Table S5). In the final multivariable model, the sampling method used was associated with uncontrolled hypertension and explained most of the heterogeneity.

Table 3: Meta-analysis results for the prevalence of uncontrolled hypertension in people with diabetes in sub-Saharan Africa

|                 | Prevalence<br>(95%CI) | No of<br>studies | Number of<br>Participants | I <sup>2</sup><br>(95%CI) | p <sub>heterogeneity</sub> |
|-----------------|-----------------------|------------------|---------------------------|---------------------------|----------------------------|
| Overall         | 74.5 (67.1-81.3)      | 11               | 2399                      | 93.1                      | <0.001                     |
| By region       |                       |                  |                           |                           |                            |
| Eastern         | 82.5 (78.8-85.9)      | 2                | 449                       | -                         | -                          |
| Western         | 75.0 (67.1-82.1)      | 2                | 131                       | -                         | -                          |
| Central         | 79.6 (70.6-86.4)      | 1                | 98                        | -                         | -                          |
| Southern        | 72.5 (62.0-81.8)      | 6                | 1721                      | 94.9                      | <0.001                     |
| By risk of bias |                       |                  |                           |                           |                            |
| Low             | 74.2 (65.8-81.9)      | 9                | 2268                      | 94.4                      | <0.001                     |

|                             |                   |                                     |      |      |        |
|-----------------------------|-------------------|-------------------------------------|------|------|--------|
| Moderate                    | 70.9 (60.1-78.8)  | 1                                   | 79   | -    | -      |
| High                        | 80.8 (68.1-89.2)  | 1                                   | 52   | -    | -      |
| By study size               |                   |                                     |      |      |        |
| Small studies               | 73.25 (66.8-79.3) | 5                                   | 344  | 40.6 | 0.15   |
| Large studies               | 75.5 (64.82-84.8) | 6                                   | 2055 | 96.4 | <0.001 |
| By period of publication    |                   |                                     |      |      |        |
| Before 2015                 | 72.9 (62.4-82.3)  | 4                                   | 1245 | 92.4 | <0.001 |
| After 2015                  | 78.0 (71.9-83.6)  | 7                                   | 1154 | 79.6 | <0.001 |
| By gender proportion        |                   |                                     |      |      |        |
| More females                | 72.5 (64.4-79.9)  | 9                                   | 1919 | 92.2 | <0.001 |
| More males                  | 83.9 (80.4-87.1)  | 2                                   | 480  | -    | -      |
| By sampling                 |                   |                                     |      |      |        |
| Consecutive                 | 76.7 (72.3-80.9)  | 9                                   | 1780 | 75.2 | <0.001 |
| Random                      | 54.1 (50.0-58.2)  | 1                                   | 567  | -    | -      |
| By setting                  |                   |                                     |      |      |        |
| Hospital                    | 75.7 (66.0-84.3)  | 8                                   | 1825 | 94.9 | <0.001 |
| Health center               | 71.6 (61.5-80.8)  | 3                                   | 574  | -    | -      |
| By comorbidity HTN target   |                   |                                     |      |      |        |
| Comorbidity target used     | 70.1 (57.4-81.5)  | 5                                   | 863  | 90.1 | <0.001 |
| Comorbidity target not used | 78.2 (73.1-82.9)  | 6                                   | 1536 | 79.3 | <0.001 |
| By Gross National Income    |                   |                                     |      |      |        |
| Below SSA Average           | 77.3 (69.7-84.2)  | 5                                   | 852  | 81.1 | <0.001 |
| Above SSA average           | 72.3 (61.0-82.3)  | 6                                   | 1547 | 94.9 | <0.001 |
| SSA=sub-Saharan Africa      |                   | <b>P<sub>egger</sub> &lt; 0.001</b> |      |      |        |

## Discussion

To our knowledge, this is the first systematic review and meta-analysis on the pooled prevalence of UHTN among patients with comorbidities in SSA. Our findings indicate more than three-quarters of the hypertensive people with comorbidities have uncontrolled hypertension. These findings support the literature describing the challenges in controlling blood pressure among those on treatment and living with comorbidities while highlighting the fact that recognition of patient comorbidities' should be a core aspect of the care and support offered to patients with hypertension.

The prevalence of uncontrolled hypertension varied with the type of comorbidity. The highest pooled UHTN prevalence estimate (75.9%) was observed in people with chronic kidney disease (75.9%) and diabetes (74.5%). Reduced risk associated with diabetes were observed in people who achieved

1  
2  
3 optimal blood pressure in a UK study (12). Another study conducted in Kenya found that 80% of  
4  
5 diabetic patients from rural and semi-urban areas had hypertension (46). Since hypertension is  
6  
7 common among people with diabetes, there is need to focus on integrated care for diabetes and  
8  
9 hypertension. These findings support literature describing the challenge in blood pressure control  
10  
11 among those on treatment and with comorbidities.  
12  
13

14  
15 The high prevalence of UHTN in people with comorbidities is concerning and requires further  
16  
17 understanding. There are several factors affecting UHTN among patients on treatment. Non-  
18  
19 adherence to antihypertensive is an important cause of uncontrolled hypertension. A systematic  
20  
21 review conducted by Abegaz et al found 45% of patients on antihypertensive were non-adherent to  
22  
23 medications with a higher proportion (84%) being among those with uncontrolled blood pressures  
24  
25 (47). Barriers to adherence are mainly related to medication side effects, low perception of the risks  
26  
27 involved with having uncontrolled blood pressure, out-of-pocket costs and pill burden due to  
28  
29 comorbidities. Provider related factors also affect the UHTN rates. A study conducted by Rose et al.  
30  
31 concluded that inadequate treatment regimens are to blame for a majority of uncontrolled  
32  
33 hypertension (7). Provider lack of adherence to hypertension guidelines in regards to dose escalation  
34  
35 and use of multiple drug regimens are a barrier to hypertension control. Chow et al revealed the use  
36  
37 of multiple drug regimens to treat hypertension was lower in low-income countries compared the  
38  
39 higher-, upper middle- or the lower middle-income countries (9).  
40  
41  
42  
43  
44

45 The prevalence of uncontrolled hypertension has declined significantly in studies published after 2015  
46  
47 compared to those published before 2015 probably because of adherence to the changing guidelines  
48  
49 promoting tighter blood pressure control for people with comorbidities. However, despite the  
50  
51 observed decline, the prevalence of uncontrolled hypertension among people with comorbidities is  
52  
53 very high and needs further research to understand the interventions that can reduce the  
54  
55 uncontrolled hypertension rate so it can be adapted in other countries.  
56  
57  
58  
59  
60

1  
2  
3 Our findings have the potential to inform public health strategies to reduce the burden of uncontrolled  
4 hypertension in SSA. Addressing the barriers identified is essential in achieving optimal blood pressure  
5 levels. The World Health Organization's global target on hypertension control action plan  
6 recommends integrated care programmes for the management of hypertension and comorbidities, a  
7 recommendation supported by the results of the current study (1).  
8  
9  
10  
11  
12  
13

### 14 **Strengths and Limitations**

15  
16  
17  
18 Strengths of our systematic review and meta-analysis include the use of a published comprehensive  
19 protocol (22) to identify all available evidence without language restriction, reporting in accordance  
20 with PRISMA guidelines, search using multiple electronic databases, searching grey literature,  
21 contacting experts in the field for additional data sources to reduce study selection bias, and  
22 heterogeneity test by subgroup analyses and sensitivity analyses. The use of two independent  
23 reviewers in data extraction and the assessment of the risk of bias further reduced assessor bias.  
24  
25  
26  
27  
28  
29  
30

31  
32 This study should however, be interpreted in the context of the following limitations. First, it is  
33 important to note that control of hypertension among those on treatment was not the main outcome  
34 of most of the included studies. Secondly, the prevalence of UHTN in some comorbidities such as atrial  
35 fibrillation and chronic kidney disease were reported in single studies probably because these  
36 conditions are understudied in SSA thus limiting the generalizeability of such findings. Fourth, most of  
37 the studies included in the meta-analysis were hospital based studies that used non-random sampling  
38 procedures. Therefore, the prevalence of UHTN in these populations needs to be confirmed by further  
39 studies. Lastly, we found substantial heterogeneity between the studies and conducted meta-  
40 regression analysis, which did not explain most of the heterogeneity. The lack of uniformity and  
41 variance in the blood pressure cut-off points for the different comorbidities may have resulted in this  
42 heterogeneity.  
43  
44  
45  
46  
47  
48  
49  
50  
51  
52  
53  
54  
55  
56  
57  
58  
59  
60

## Conclusion

In conclusion, the prevalence of uncontrolled hypertension is high in people with comorbid conditions in sub-Saharan Africa, particularly among people with diabetes. These findings strengthen the case for action to implement integrated care in the control of hypertension more effectively in African populations and other low-and-middle-income countries. Such efforts include improved access to blood pressure testing among people with comorbidities, strategies to improve adherence, reviewing treatment guidelines and training of healthcare workers in managing people with hypertension comorbidities, and monitoring blood pressure control among all patients on treatment.

## Sources of funding

Shukri F. Mohamed, Olalekan Uthman, and Paramjit Gill are supported by the National Institute for Health Research using Official Development Assistance (ODA) funding (NIHR Award ID: 16/136/87).

The views expressed in this publication are those of the author(s) and not necessarily those of the NHS, the National Institute for Health Research or the Department of Health and Social Care.

## Disclosures

None.

## Acknowledgments

The authors would like to thank Rishi Calleyachetty, (Assistant Professor, University of Warwick) and Ivy Chumo (Research Officer, African Population and Health Research Center) for their initial support in the conceptualization of this systematic review and meta-analysis. We also thank Samantha Johnson (Academic Support Librarian for Medicine, Life Sciences and Psychology, University of Warwick) for her guidance with the design of the initial literature search strategy.

## Contributors

SFM conceived the study. SFM, OAU, MKM, GA, ASM, and PG designed the search strategy. SFM and ASM conducted the searches, retrieved articles, screened abstract and title, and the full text of

1  
2  
3 potentially relevant articles. SFM wrote the first draft of the manuscript. All authors critically revised  
4  
5 the manuscript and contributed to subsequent iterations.  
6  
7  
8  
9  
10  
11  
12  
13  
14  
15  
16  
17  
18  
19  
20  
21  
22  
23  
24  
25  
26  
27  
28  
29  
30  
31  
32  
33  
34  
35  
36  
37  
38  
39  
40  
41  
42  
43  
44  
45  
46  
47  
48  
49  
50  
51  
52  
53  
54  
55  
56  
57  
58  
59  
60

For peer review only

## List of figures

Figure 1: Study selection flow diagram

Figure 2: Funnel plot of the prevalence of uncontrolled hypertension in people with comorbidities in sub-Saharan Africa.

Figure 3: Pooled prevalence of uncontrolled hypertension in people with comorbidities in sub-Saharan Africa, by comorbidities.

Figure 4: Funnel plot of the prevalence of uncontrolled hypertension in people with diabetes in sub-Saharan Africa

For peer review only

## References

1. World Health Organization. Global NCD target: Reduce high blood pressure. September 2016 ed: World Health Organization; 2016.
2. Egan BM, Kjeldsen SE, Grassi G, Esler M, Mancia G. The global burden of hypertension exceeds 1.4 billion people: should a systolic blood pressure target below 130 become the universal standard? *Journal of hypertension*. 2019;37(6):1148-53.
3. Mills KT, Bundy JD, Kelly TN, Reed JE, Kearney PM, Reynolds K, et al. Global Disparities of Hypertension Prevalence and Control: A Systematic Analysis of Population-Based Studies From 90 Countries. *Circulation*. 2016;134(6):441-50.
4. Zhou B, Bentham J, Di Cesare M, Bixby H, Danaei G, Cowan MJ, et al. Worldwide trends in blood pressure from 1975 to 2015: a pooled analysis of 1479 population-based measurement studies with 19·1 million participants. *The Lancet*. 2017;389(10064):37-55.
5. Ataklte F, Erqou S, Kaptoge S, Taye B, Echouffo-Tcheugui JB, Kengne AP. Burden of Undiagnosed Hypertension in Sub-Saharan Africa: A Systematic Review and Meta-Analysis. *Hypertension*. 2015;65(2):291-8.
6. World Health Organization. Counterfeit medicines: an update on estimates 15 November 2006. 2013.
7. Rose AJ, Berlowitz DR, Orner MB, Kressin NR. Understanding uncontrolled hypertension: is it the patient or the provider? *The Journal of Clinical Hypertension*. 2007;9(12):937-43.
8. Cushman W, Ford C, Cutler J, Margolis K, Davis B, Grimm R, et al. ALLHAT Collaborative Research Group: success and predictors of blood pressure control in diverse North American settings: the Antihypertensive and Lipid-Lowering Treatment to Prevent Heart Attack Trial (ALLHAT). *J Clin Hypertens*. 2002;4(6):393-404.
9. Chow CK, Teo KK, Rangarajan S, Islam S, Gupta R, Avezum A, et al. Prevalence, awareness, treatment, and control of hypertension in rural and urban communities in high-, middle-, and low-income countries. *Jama*. 2013;310(9):959-68.
10. Degli Esposti E, Di Martino M, Sturani A, Russo P, Dradi C, Falcinelli S, et al. Risk factors for uncontrolled hypertension in Italy. *Journal of human hypertension*. 2004;18:207.
11. Liu X, Song P. Is the Association of Diabetes With Uncontrolled Blood Pressure Stronger in Mexican Americans and Blacks Than in Whites Among Diagnosed Hypertensive Patients? *American Journal of Hypertension*. 2013;26(11):1328-34.
12. Group UKPDS. Tight blood pressure control and risk of macrovascular and microvascular complications in type 2 diabetes: UKPDS 38. UK Prospective Diabetes Study Group. *BMJ (Clinical research ed)*. 1998;317(7160):703-13.
13. Cappuccio FP, Kerry SM, Micah FB, Plange-Rhule J, Eastwood JB. A community programme to reduce salt intake and blood pressure in Ghana [ISRCTN88789643]. *BMC public health*. 2006;6:13.
14. Oti SO, van de Vijver S, Gomez GB, Agyemang C, Egondi T, Kyobutungi C, et al. Outcomes and costs of implementing a community-based intervention for hypertension in an urban slum in Kenya. *Bulletin of the World Health Organization*. 2016;94(7):501-9.
15. van de Vijver S, Oti SO, Gomez GB, Agyemang C, Egondi T, Moll van Charante E, et al. Impact evaluation of a community-based intervention for prevention of cardiovascular diseases in the slums of Nairobi: the SCALE-UP study. *Glob Health Action*. 2016;9:30922.
16. Ozoemena EL, Iweama CN, Agbaje OS, Umoke PCI, Ene OC, Ofili PC, et al. Effects of a health education intervention on hypertension-related knowledge, prevention and self-care practices in Nigerian retirees: a quasi-experimental study. *Archives of Public Health*. 2019;77(1):23.
17. Mohamed SF, Mutua MK, Wamai R, Wekesah F, Haregu T, Juma P, et al. Prevalence, awareness, treatment and control of hypertension and their determinants: results from a national survey in Kenya. *BMC public health*. 2018;18(Suppl 3):1219.



18. Monakali S, Ter Goon D, Seekoe E, Owolabi EO. Prevalence, awareness, control and determinants of hypertension among primary health care professional nurses in Eastern Cape, South Africa. 2018. 2018;10(1).
19. Guwatudde D, Mutungi G, Wesonga R, Kajjura R, Kasule H, Muwonge J, et al. The epidemiology of hypertension in Uganda: findings from the national non-communicable diseases risk factor survey. *PloS one*. 2015;10(9):e0138991.
20. Mayige M, Kagaruki G. Tanzania Steps Survey Report. 2013.
21. Msyamboza KP, Kathyola D, Dzowela T, Bowie C. The burden of hypertension and its risk factors in Malawi: nationwide population-based STEPS survey. *International health*. 2012;4(4):246-52.
22. Mohamed SF, Uthman OA, Caleyachetty R, Chumo I, Mutua MK, Asiki G, et al. Uncontrolled hypertension among patients with comorbidities in sub-Saharan Africa: protocol for a systematic review and meta-analysis. *Systematic Reviews*. 2020;9(1):16.
23. Moher D, Liberati A, Tetzlaff J, Altman DG. Preferred reporting items for systematic reviews and meta-analyses: the PRISMA statement. 2009;339:b2535.
24. Hoy D, Brooks P, Woolf A, Blyth F, March L, Bain C, et al. Assessing risk of bias in prevalence studies: modification of an existing tool and evidence of interrater agreement. *Journal of clinical epidemiology*. 2012;65(9):934-9.
25. Higgins JP, Thompson SG. Quantifying heterogeneity in a meta-analysis. *Statistics in medicine*. 2002;21(11):1539-58.
26. Higgins JPT, Thompson SG, Deeks JJ, Altman DG. Measuring inconsistency in meta-analyses. *BMJ (Clinical research ed)*. 2003;327(7414):557-60.
27. Egger M, Smith GD, Schneider M, Minder C. Bias in meta-analysis detected by a simple, graphical test. *Bmj*. 1997;315(7109):629-34.
28. Abboud H, Labreuche J, Arauz A, Bryer A, Lavados PG, Massaro A, et al. Demographics, socio-economic characteristics, and risk factor prevalence in patients with non-cardioembolic ischaemic stroke in low- and middle-income countries: the OPTIC registry. *Int J Stroke*. 2013;8 Suppl A100:4-13.
29. Abera H, Woldemichael M. PATTERN OF ANTIHYPERTENSIVE THERAPY AMONG DIABETIC HYPERTENSIVE PATIENTS IN ZEWDITU MEMORIAL HOSPITAL, ADDIS ABABA. *Ethiop Med J*. 2016;54(2):77-82.
30. Adeniyi OV, Yogeswaran P, Longo-Mbenza B, Ter Goon D. Uncontrolled Hypertension and Its Determinants in Patients with Concomitant Type 2 Diabetes Mellitus (T2DM) in Rural South Africa. *PLoS One*. 2016;11(3):e0150033.
31. Agaba EI, Puepet FH, Ugoya SO, Agaba PA, Adabe R, Duguru M, et al. Chronic kidney disease screening and renoprotection in type 2 diabetes. *Ann Afr Med*. 2009;8(1):52-4.
32. Babua C, Kalyesubula R, Okello E, Kakande B, Sebatta E, Mungoma M, et al. Cardiovascular risk factors among patients with chronic kidney disease attending a tertiary hospital in Uganda. *Cardiovasc J Afr*. 2015;26(4):177-80.
33. Choukem SP, Kengne AP, Dehayem YM, Simo NL, Mbanja JC. Hypertension in people with diabetes in sub-Saharan Africa: revealing the hidden face of the iceberg. *Diabetes Res Clin Pract*. 2007;77(2):293-9.
34. Cohen DB, Allain TJ, Glover S, Chimbayo D, Dzamalala H, Hofland HW, et al. A survey of the management, control, and complications of diabetes mellitus in patients attending a diabetes clinic in Blantyre, Malawi, an area of high HIV prevalence. *Am J Trop Med Hyg*. 2010;83(3):575-81.
35. Hyle EP, Bekker LG, Martey EB, Huang M, Xu A, Parker RA, et al. Cardiovascular risk factors among ART-experienced people with HIV in South Africa. *J Int AIDS Soc*. 2019;22(4):e25274.
36. Jardine RM, Fine J, Obel IW. A survey on the treatment of atrial fibrillation in South Africa. *S Afr Med J*. 2014;104(9):623-7.
37. Muddu M, Tusubira AK, Sharma SK, Akiteng AR, Ssinabulya I, Schwartz JI. Integrated Hypertension and HIV Care Cascades in an HIV Treatment Program in Eastern Uganda: A Retrospective Cohort Study. *J Acquir Immune Defic Syndr*. 2019;81(5):552-61.

- 1  
2  
3 38. Mwita JC, Mugusi F, Lwakatare J, Chiwanga F. Hypertension control and other cardiovascular  
4 risk factors among diabetic patients at Muhimbili National Hospital, Tanzania. *East Afr J Public*  
5 *Health*. 2012;9(2):70-3.  
6 39. Pinchevsky Y, Butkow N, Chirwa T, Raal F. Treatment Gaps Found in the Management of  
7 Type 2 Diabetes at a Community Health Centre in Johannesburg, South Africa. *J Diabetes Res*.  
8 2017;2017:9536025.  
9 40. Pinchevsky Y, Butkow N, Raal FJ, Chirwa T. The implementation of guidelines in a South  
10 African population with type 2 diabetes. *Journal of Endocrinology, Metabolism and Diabetes of*  
11 *South Africa*. 2013;18(3):154-8.  
12 41. Rotchford AP, Rotchford KM. Diabetes in rural South Africa--an assessment of care and  
13 complications. *S Afr Med J*. 2002;92(7):536-41.  
14 42. Soetedjo NNM, McAllister SM, Ugarte-Gil C, Firanesco AG, Ronacher K, Alisjahbana B, et al.  
15 Disease characteristics and treatment of patients with diabetes mellitus attending government  
16 health services in Indonesia, Peru, Romania and South Africa. *Trop Med Int Health*.  
17 2018;23(10):1118-28.  
18 43. Steffen H, Phiri S, Heller T, Chaweza T, Demir M, Tweya H, et al. [PP.01.21] HYPERTENSION  
19 PREVALENCE, AWARENESS, TREATMENT AND CONTROL IN AMBULATORY TREATMENT-NAÏVE HIV  
20 INFECTED PATIENTS IN LILONGWE, MALAWI. *Journal of hypertension*. 2017;35.  
21 44. Wahab KW, Kolo PM, Salawu FK, Sanya EO. Blood Pressure Control among Hypertensive  
22 Stroke Survivors in Nigeria. *J Stroke Cerebrovasc Dis*. 2017;26(6):1222-7.  
23 45. Yaméogo NV, Mbaye A, Ndour M, Kagambega LJ, Diomande H, Hakim R, et al. Control of  
24 cardiovascular risk in black Africans with type 2 diabetes in Senegal. *Cardiovascular Journal of Africa*.  
25 2012;23(5):270-2.  
26 46. Githinji GG, Hussein AA, Kimani T, Mutuku B, Githuku J, Gura Z, et al. Prevalence of diabetes  
27 and co-morbidities in five rural and semi-urban Kenyan counties, 2010–2015. *International Journal*  
28 *of Diabetes in Developing Countries*. 2018;38(2):243-8.  
29 47. Abegaz TM, Shehab A, Gebreyohannes EA, Bhagavathula AS, Elnour AA. Nonadherence to  
30 antihypertensive drugs: A systematic review and meta-analysis. *Medicine*. 2017;96(4):e5641.  
31  
32  
33  
34  
35  
36  
37  
38  
39  
40  
41  
42  
43  
44  
45  
46  
47  
48  
49  
50  
51  
52  
53  
54  
55  
56  
57  
58  
59  
60

**Figure 1: Study selection flow diagram**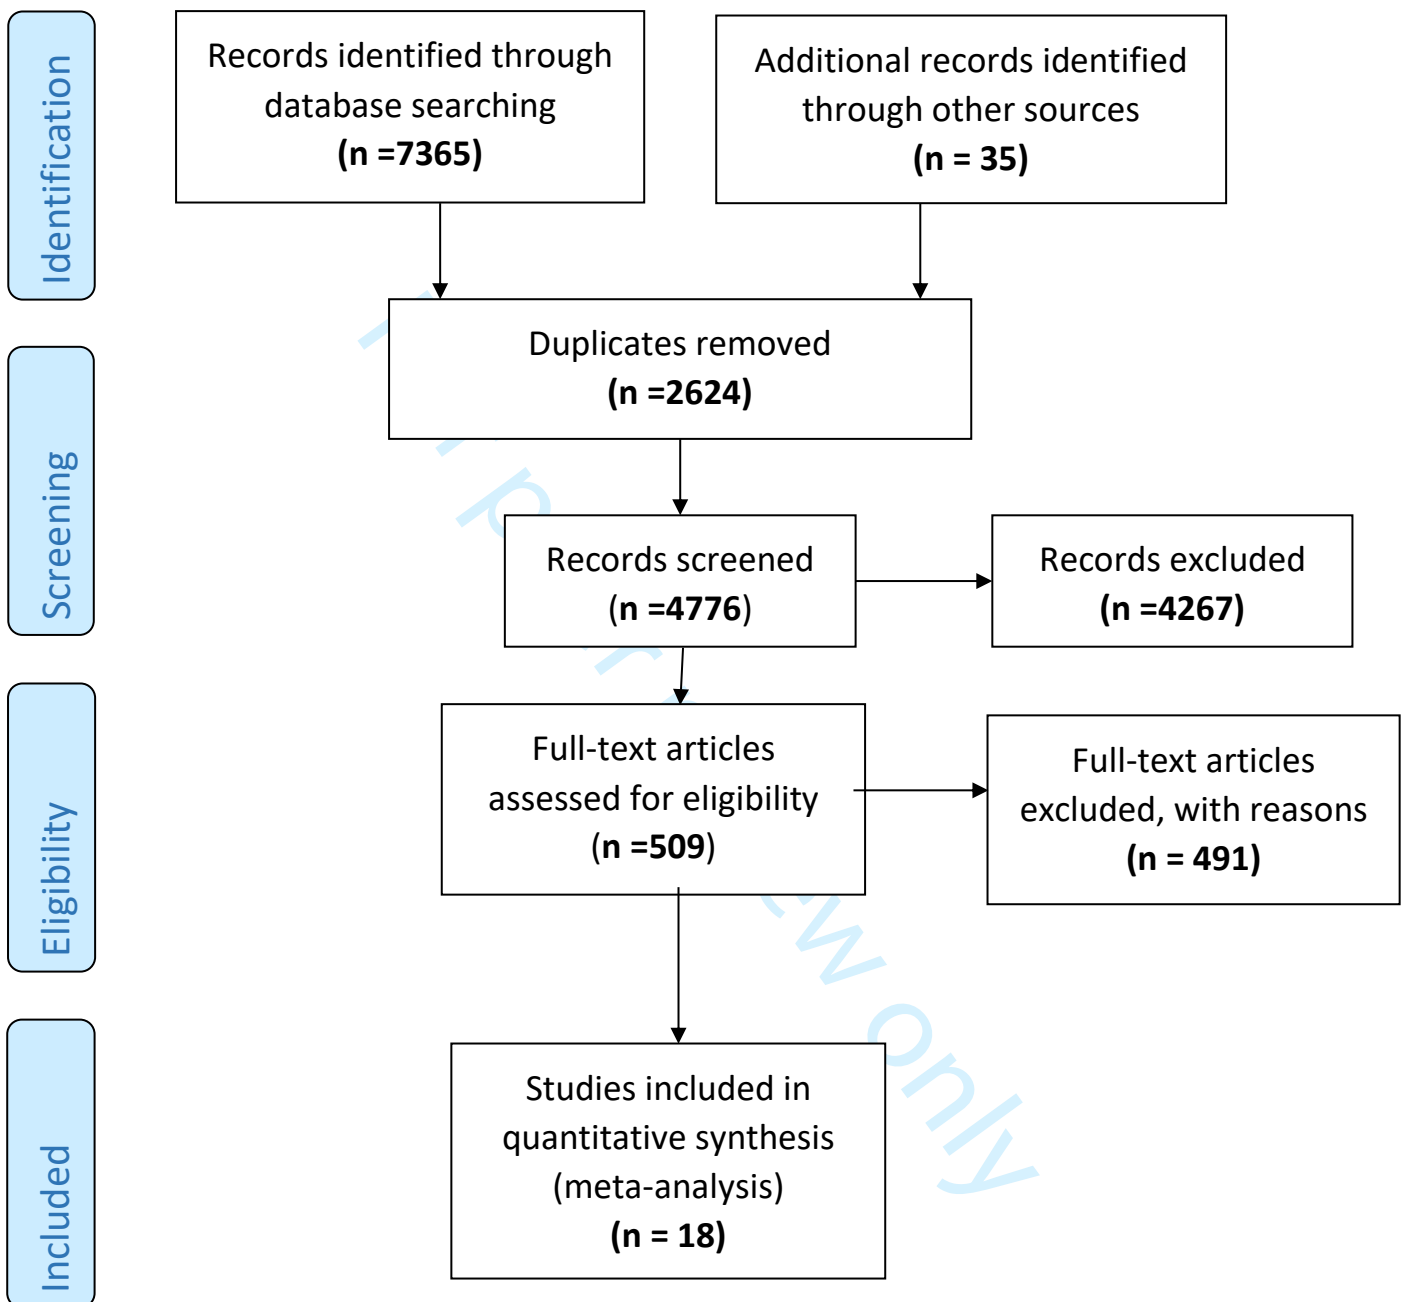

Figure 2: Funnel plot of the prevalence of uncontrolled hypertension in people with comorbidities in sub-Saharan Africa

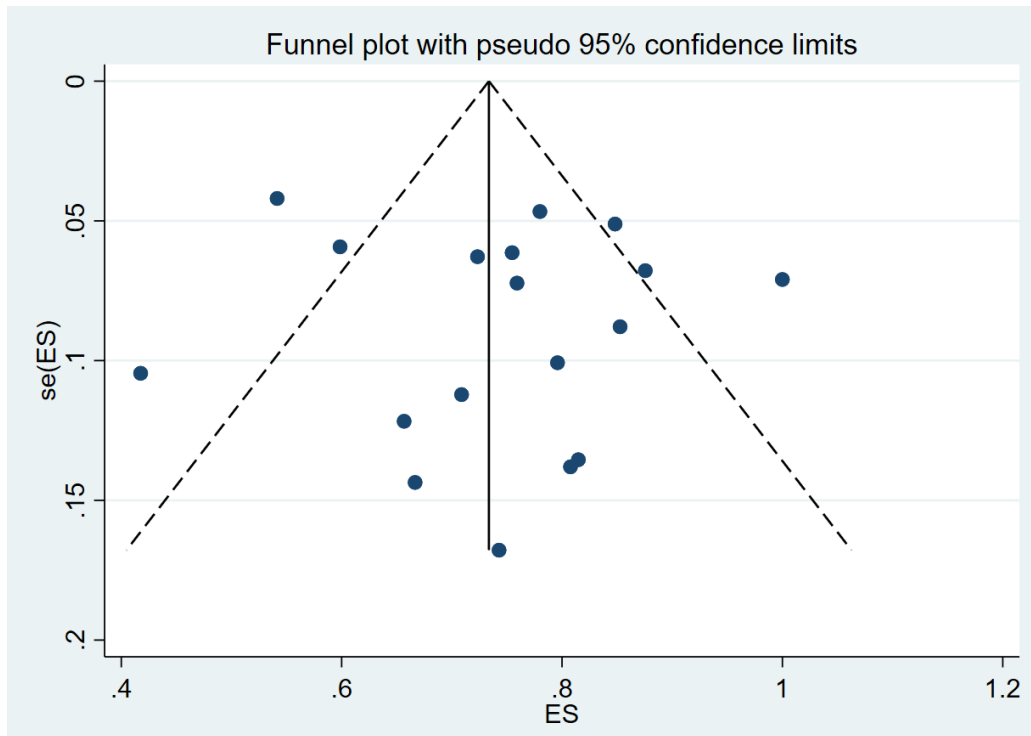

Review only

Figure 3: Pooled prevalence of uncontrolled hypertension in people with comorbidities in sub-Saharan Africa, by comorbidities

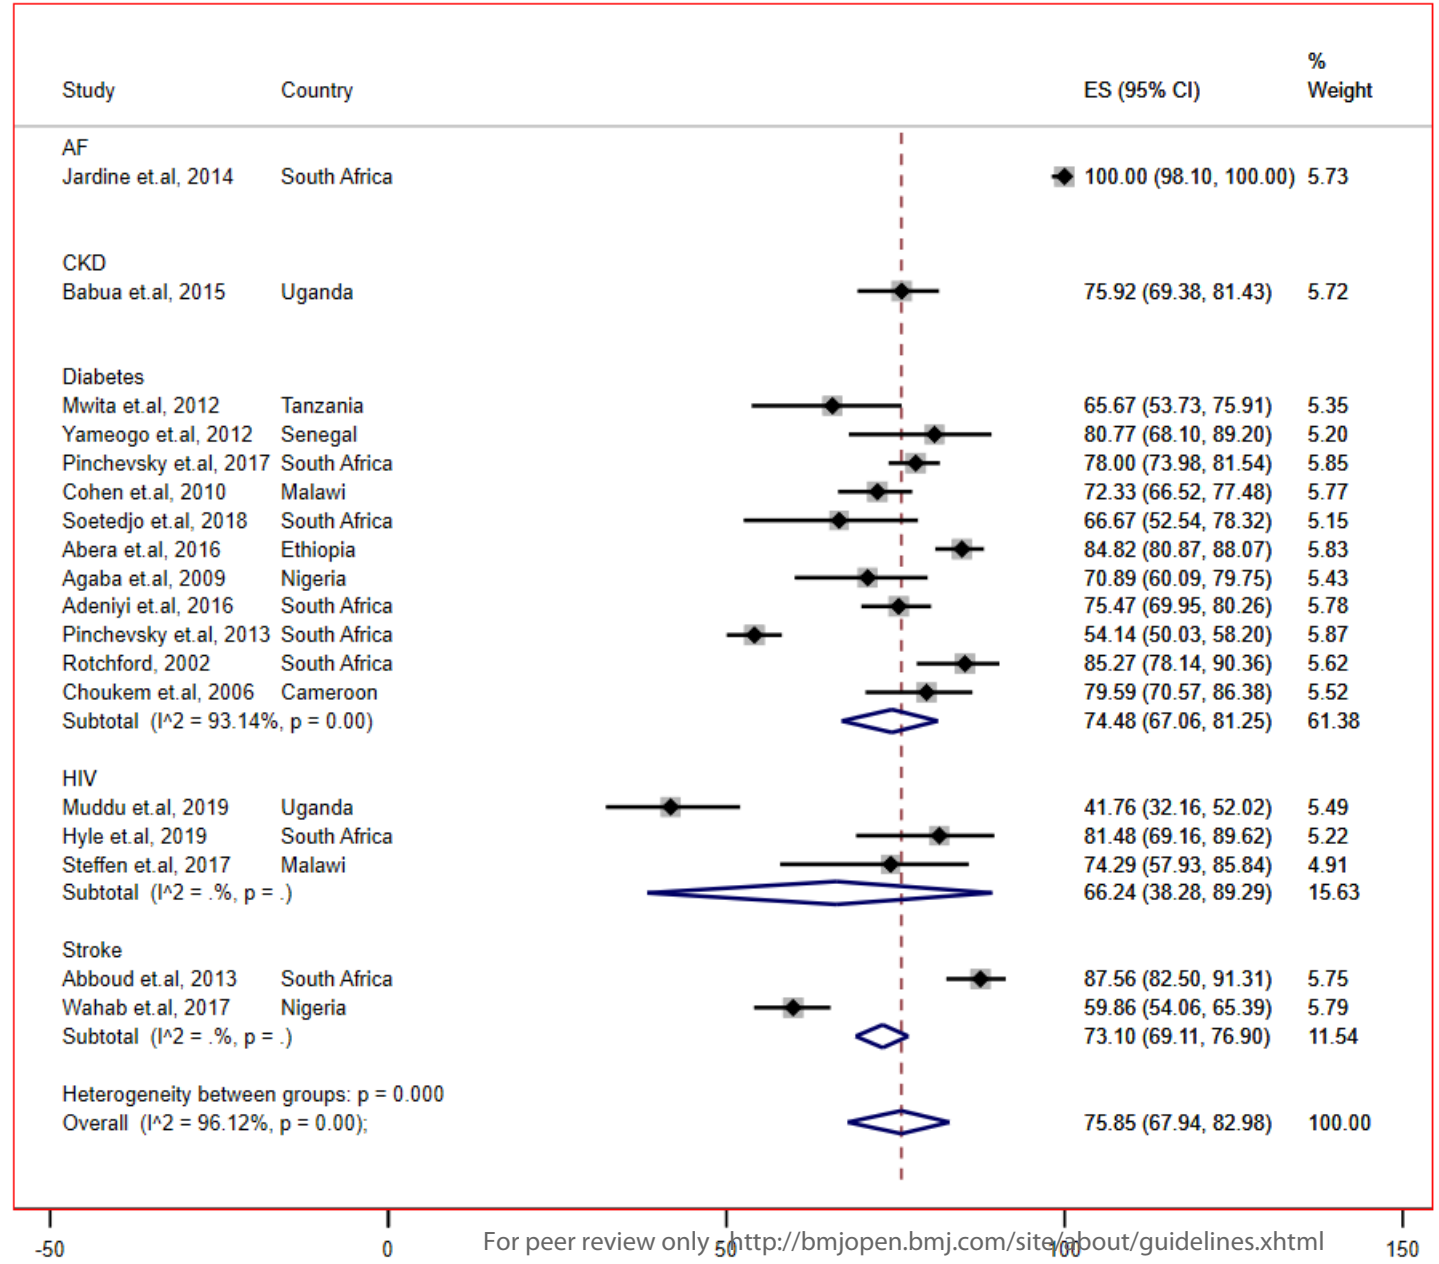

1  
2  
3  
4  
5  
6  
7  
8  
9  
10  
11  
12  
13  
14  
15  
16  
17  
18  
19  
20  
21  
22  
23  
24  
25  
26  
27  
28  
29  
30  
31  
32  
33  
34  
35  
36  
37  
38  
39  
40  
41  
42  
43  
44  
45  
46

Figure 4: Funnel plot of the prevalence of uncontrolled hypertension in people with diabetes in sub-Saharan Africa

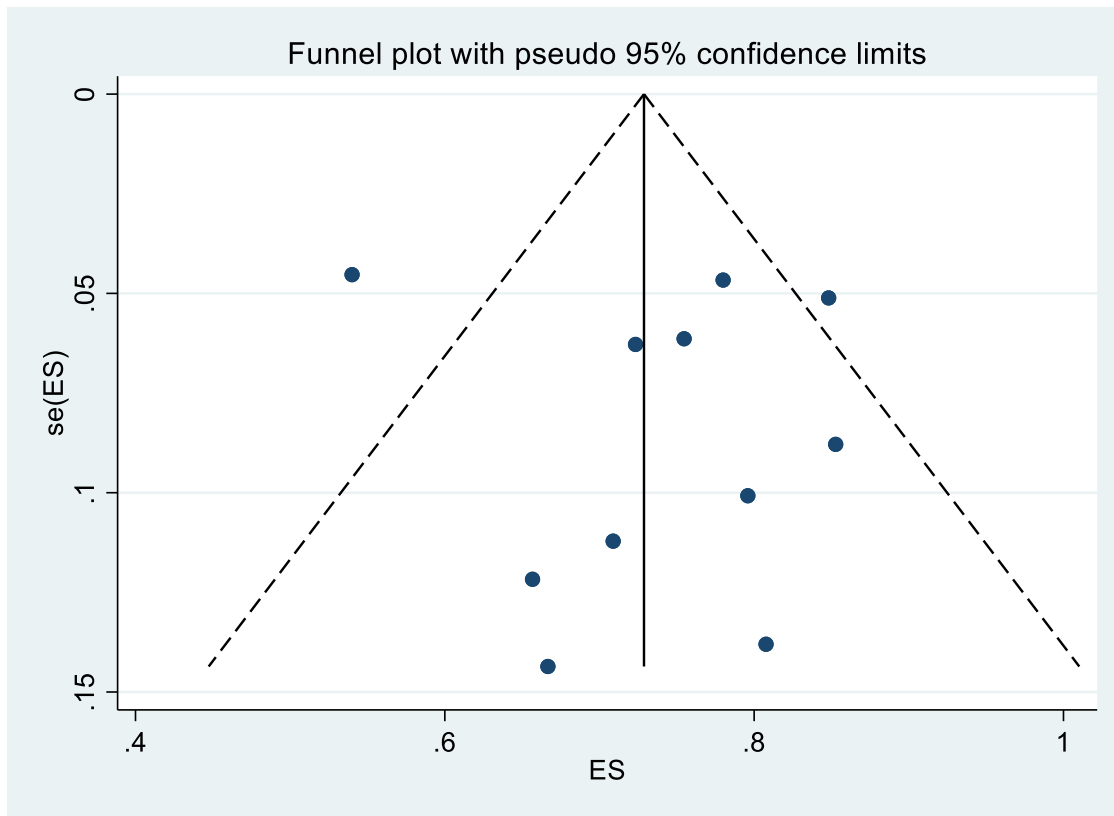

Review only

**Supplementary file S1 – Search strategy****Medline - search**

1. exp Hypertension/ or hypertension.mp.
2. exp Hypertension/ or uncontrolled hypertension.mp.
3. exp Hypertension/ or uncontrolled blood pressure.mp.
4. high blood pressure.mp. or exp Hypertension/
5. 1 or 2 or 3 or 4
6. type 2 diabetes mellitus.mp. or exp Diabetes Mellitus, Type 2/
7. type 2 diabetes.mp. or exp Diabetes Mellitus, Type 2/
8. exp Diabetes Mellitus, Type 2/ or type II diabetes.mp.
9. dyslipidemia.mp. or exp Dyslipidemias/
10. exp Dyslipidemias/ or dyslipidimia.mp.
11. exp Dyslipidemias/ or dyslipidaemia.mp.
12. Hypercholesterolemia.mp. or exp Hypercholesterolemia/
13. Hypercholesterolaemia.mp. or exp Hypercholesterolemia/
14. Hypercholesterolimia.mp. [mp=title, abstract, original title, name of substance word, subject heading word, floating sub-heading word, keyword heading word, organism supplementary concept word, protocol supplementary concept word, rare disease supplementary concept word, unique identifier, synonyms]
15. hypertriglyceridemia.mp. or exp Hypertriglyceridemia/
16. exp Hypertriglyceridemia/ or hypertriglyceridaemia.mp.
17. hypertriglyceridimia.mp.
18. hyperlipidemia.mp. or exp Hyperlipidemias/
19. exp Hyperlipidemias/ or hyperlipidaemia.mp.
20. hyperlipidimia.mp.
21. obesity.mp. or exp Obesity/
22. chronic kidney disease.mp. or exp Renal Insufficiency, Chronic/
23. stroke.mp. or exp Stroke/
24. transient ischemic attack.mp. or exp Ischemic Attack, Transient/
25. Stroke/ or exp Ischemic Attack, Transient/ or transient ischaemic attack.mp.
26. coronary heart disease.mp. or exp Coronary Disease/
27. Heart failure.mp. or exp Heart Failure/
28. peripheral vascular disease.mp. or exp Peripheral Vascular Diseases/
29. atrial fibrillation.mp. or exp Atrial Fibrillation/
30. depression.mp. or exp Depression/
31. HIV/ or HIV.mp.
32. human immunodeficiency virus.mp. or exp HIV/
33. 6 or 7 or 8 or 9 or 10 or 11 or 12 or 13 or 14 or 15 or 16 or 17 or 18 or 19 or 20 or 21 or 22 or 23 or 24 or 25 or 26 or 27 or 28 or 29 or 30 or 31 or 32
34. (Angola or Benin or Botswana or "Burkina Faso" or "Upper Volta" or Burundi or Urundi or Cameroon or Cameroons or "Cape Verde" or "Central African Republic" or Chad or Comoros or "Comoro Islands" or Comores or Mayotte or Congo or Zaire or "Cote d'Ivoire" or "Ivory Coast" or ("Democratic Republic of the Congo" or Djibouti or "French Somaliland" or Eritrea or Ethiopia or Gabon or "Gabonese Republic" or Gambia or Ghana or "Gold Coast" or Guinea or Kenya or Lesotho or Basutoland or Liberia) or (Madagascar or "Malagasy Republic" or Malawi or Nyasaland or Mali or Mauritania or Mauritius or Mozambique or Namibia or Niger or Nigeria) or (Rwanda or "Sao Tome" or Seychelles or Senegal or "Sierra Leone" or Somalia or "South Africa" or Sudan or Swaziland or Tanzania or Togo or "Togolese Republic" or Uganda or Zambia or Zimbabwe or Rhodesia)).mp. [mp=title, abstract, original title, name of substance word, subject heading word, floating sub-heading word, keyword heading word, organism supplementary concept word, protocol supplementary concept word, rare disease supplementary concept word, unique identifier, synonyms]
35. sub-Saharan africa.mp. or exp "Africa South of the Sahara"/
36. subsaharan africa.mp. or exp "Africa South of the Sahara"/
37. 34 or 35 or 36
38. 5 and 33 and 37
39. limit 38 to (humans and yr="2000 - 2019")

**Embase - search**

1. hypertension.mp. or exp hypertension/
2. exp hypertension/ or uncontrolled hypertension.mp. or exp antihypertensive agent/
3. exp antihypertensive agent/ or exp hypertension/ or uncontrolled blood pressure.mp.
4. high blood pressure.mp. or exp hypertension/
5. 1 or 2 or 3 or 4
6. type 2 diabetes mellitus.mp. or exp non insulin dependent diabetes mellitus/
7. type 2 diabetes.mp. or exp non insulin dependent diabetes mellitus/
8. type II diabetes.mp. or exp non insulin dependent diabetes mellitus/
9. dyslipidemia.mp. or exp dyslipidemia/
10. dyslipidimia.mp.
11. dyslipidaemia.mp. or exp dyslipidemia/
12. exp hypercholesterolemia/ or Hypercholesterolemia.mp.
13. Hypercholesterolaemia.mp. or exp hypercholesterolemia/
14. Hypercholesterolimia.mp.
15. hypertriglyceridemia.mp. or exp hypertriglyceridemia/
16. hypertriglyceridaemia.mp. or exp hypertriglyceridemia/
17. hypertriglyceridimia.mp. or exp hypertriglyceridemia/
18. hyperlipidemia.mp. [mp=title, abstract, original title, name of substance word, subject heading word, floating sub-heading word, keyword heading word, organism supplementary concept word, protocol supplementary concept word, rare disease supplementary concept word, unique identifier, synonyms]
19. hyperlipidaemia.mp. [mp=title, abstract, original title, name of substance word, subject heading word, floating sub-heading word, keyword heading word, organism supplementary concept word, protocol supplementary concept word, rare disease supplementary concept word, unique identifier, synonyms]
20. hyperlipidimia.mp. [mp=title, abstract, original title, name of substance word, subject heading word, floating sub-heading word, keyword heading word, organism supplementary concept word, protocol supplementary concept word, rare disease supplementary concept word, unique identifier, synonyms]
21. obesity.mp. or exp obesity/
22. chronic kidney disease.mp. or exp chronic kidney failure/
23. stroke.mp. or exp cerebrovascular accident/
24. transient ischemic attack.mp. or exp transient ischemic attack/
25. transient ischaemic attack.mp. or exp transient ischemic attack/
26. coronary heart disease.mp. or exp ischemic heart disease/
27. Heart failure.mp. or exp heart failure/
28. peripheral vascular disease.mp. or exp peripheral vascular disease/
29. atrial fibrillation.mp. or exp atrial fibrillation/
30. exp depression/ or depression.mp.
31. HIV.mp. or exp Human immunodeficiency virus/
32. 6 or 7 or 8 or 9 or 10 or 11 or 12 or 13 or 14 or 15 or 16 or 17 or 21 or 22 or 23 or 24 or 25 or 26 or 27 or 28 or 29 or 30 or 31
33. (Angola or Benin or Botswana or "Burkina Faso" or "Upper Volta" or Burundi or Urundi or Cameroon or Cameroons or "Cape Verde" or "Central African Republic" or Chad or Comoros or "Comoro Islands" or Comores or Mayotte or Congo or Zaire or "Cote d'Ivoire" or "Ivory Coast" or ("Democratic Republic of the Congo" or Djibouti or "French Somaliland" or Eritrea or Ethiopia or Gabon or "Gabonese Republic" or Gambia or Ghana or "Gold Coast" or Guinea or Kenya or Lesotho or Basutoland or Liberia) or (Madagascar or "Malagasy Republic" or Malawi or Nyasaland or Mali or Mauritania or Mauritius or Mozambique or Namibia or Niger or Nigeria) or (Rwanda or "Sao Tome" or Seychelles or Senegal or "Sierra Leone" or Somalia or "South Africa" or Sudan or Swaziland or Tanzania or Togo or "Togolese Republic" or Uganda or Zambia or Zimbabwe or Rhodesia)).mp. [mp=title, abstract, original title, name of substance word, subject heading word, floating sub-heading word, keyword heading word, organism supplementary concept word, protocol supplementary concept word, rare disease supplementary concept word, unique identifier, synonyms]
34. sub-Saharan africa.mp. or exp "Africa south of the Sahara"/
35. subsaharan africa.mp. or exp "Africa south of the Sahara"/



36. 33 or 34 or 35

37. 5 and 32 and 36

38. limit 37 to (human and yr="2000 - 2019")

### Web of Science - search

|      |                  |                                                                                                                                                                                                                                                                                                                                                                                                                                                                                                                                                                                                                                                                                                                                                                                                                                                                                                                                                                            |                                                        |
|------|------------------|----------------------------------------------------------------------------------------------------------------------------------------------------------------------------------------------------------------------------------------------------------------------------------------------------------------------------------------------------------------------------------------------------------------------------------------------------------------------------------------------------------------------------------------------------------------------------------------------------------------------------------------------------------------------------------------------------------------------------------------------------------------------------------------------------------------------------------------------------------------------------------------------------------------------------------------------------------------------------|--------------------------------------------------------|
| # 38 | <b>2,114</b>     | #37 AND #33 AND #5<br><i>Indexes=SCI-EXPANDED, SSCI, A&amp;HCI, CPCI-S, CPCI-SSH, ESCI</i><br><i>Timespan=2000-2019</i>                                                                                                                                                                                                                                                                                                                                                                                                                                                                                                                                                                                                                                                                                                                                                                                                                                                    | Edit <input type="checkbox"/> <input type="checkbox"/> |
| # 37 | <b>421,085</b>   | #36 OR #35 OR #34<br><i>Indexes=SCI-EXPANDED, SSCI, A&amp;HCI, CPCI-S, CPCI-SSH, ESCI</i><br><i>Timespan=2000-2019</i>                                                                                                                                                                                                                                                                                                                                                                                                                                                                                                                                                                                                                                                                                                                                                                                                                                                     | Edit <input type="checkbox"/> <input type="checkbox"/> |
| # 36 | <b>301</b>       | TS=(sub-Saharan Africa)<br><i>Indexes=SCI-EXPANDED, SSCI, A&amp;HCI, CPCI-S, CPCI-SSH, ESCI</i><br><i>Timespan=2000-2019</i>                                                                                                                                                                                                                                                                                                                                                                                                                                                                                                                                                                                                                                                                                                                                                                                                                                               | Edit <input type="checkbox"/> <input type="checkbox"/> |
| # 35 | <b>33,673</b>    | TS=(sub-Saharan Africa)<br><i>Indexes=SCI-EXPANDED, SSCI, A&amp;HCI, CPCI-S, CPCI-SSH, ESCI</i><br><i>Timespan=2000-2019</i>                                                                                                                                                                                                                                                                                                                                                                                                                                                                                                                                                                                                                                                                                                                                                                                                                                               | Edit <input type="checkbox"/> <input type="checkbox"/> |
| # 34 | <b>407,520</b>   | TS=(Angola OR Benin OR Botswana OR "Burkina Faso" OR "Upper Volta" OR Burundi OR Urundi OR Cameroon OR Cameroons OR "Cape Verde" OR "Central African Republic" OR Chad OR Comoros OR "Comoro Islands" OR Comores OR Mayotte OR Congo OR Zaire OR "Cote d'Ivoire" OR "Ivory Coast" OR "Democratic Republic of the Congo" OR Djibouti OR "French Somaliland" OR Eritrea OR Ethiopia OR Gabon OR "Gabonese Republic" OR Gambia OR Ghana OR "Gold Coast" OR Guinea OR Kenya OR Lesotho OR Basutoland OR Liberia OR Madagascar OR "Malagasy Republic" OR Malawi OR Nyasaland OR Mali OR Mauritania OR Mauritius OR Mozambique OR Namibia OR Niger OR Nigeria OR Rwanda OR "Sao Tome" OR Seychelles OR Senegal OR "Sierra Leone" OR Somalia OR "South Africa" OR Sudan OR Swaziland OR Tanzania OR Togo OR "Togolese Republic" OR Uganda OR Zambia OR Zimbabwe OR Rhodesia)<br><i>Indexes=SCI-EXPANDED, SSCI, A&amp;HCI, CPCI-S, CPCI-SSH, ESCI</i><br><i>Timespan=2000-2019</i> | Edit <input type="checkbox"/> <input type="checkbox"/> |
| # 33 | <b>1,764,519</b> | #32 OR #31 OR #30 OR #29 OR #28 OR #27 OR #26 OR #25 OR #24 OR #23 OR #22 OR #21 OR #20 OR #19 OR #18 OR #17 OR #16 OR #15 OR #14 OR #13 OR #12 OR #11 OR #10 OR #9 OR #8 OR #7 OR #6<br><i>Indexes=SCI-EXPANDED, SSCI, A&amp;HCI, CPCI-S, CPCI-SSH, ESCI</i><br><i>Timespan=2000-2019</i>                                                                                                                                                                                                                                                                                                                                                                                                                                                                                                                                                                                                                                                                                 | Edit <input type="checkbox"/> <input type="checkbox"/> |
| # 32 | <b>85,771</b>    | TS=(Human immunodeficiency virus)<br><i>Indexes=SCI-EXPANDED, SSCI, A&amp;HCI, CPCI-S, CPCI-SSH, ESCI</i><br><i>Timespan=2000-2019</i>                                                                                                                                                                                                                                                                                                                                                                                                                                                                                                                                                                                                                                                                                                                                                                                                                                     | Edit <input type="checkbox"/> <input type="checkbox"/> |
| # 31 | <b>272,497</b>   | TS=(HIV)<br><i>Indexes=SCI-EXPANDED, SSCI, A&amp;HCI, CPCI-S, CPCI-SSH, ESCI</i><br><i>Timespan=2000-2019</i>                                                                                                                                                                                                                                                                                                                                                                                                                                                                                                                                                                                                                                                                                                                                                                                                                                                              | Edit <input type="checkbox"/> <input type="checkbox"/> |
| # 30 | <b>369,094</b>   | TS=(depression)<br><i>Indexes=SCI-EXPANDED, SSCI, A&amp;HCI, CPCI-S, CPCI-SSH, ESCI</i><br><i>Timespan=2000-2019</i>                                                                                                                                                                                                                                                                                                                                                                                                                                                                                                                                                                                                                                                                                                                                                                                                                                                       | Edit <input type="checkbox"/> <input type="checkbox"/> |

|    |      |                |                                                                                                                                       |                                                        |
|----|------|----------------|---------------------------------------------------------------------------------------------------------------------------------------|--------------------------------------------------------|
| 1  | # 29 | <b>80,988</b>  | TS=(atrial fibrillation)<br><i>Indexes=SCI-EXPANDED, SSCI, A&amp;HCI, CPCI-S, CPCI-SSH, ESCI</i><br><i>Timespan=2000-2019</i>         | Edit <input type="checkbox"/> <input type="checkbox"/> |
| 2  |      |                |                                                                                                                                       |                                                        |
| 3  |      |                |                                                                                                                                       |                                                        |
| 4  |      |                |                                                                                                                                       |                                                        |
| 5  | # 28 | <b>20,886</b>  | TS=(peripheral vascular disease)<br><i>Indexes=SCI-EXPANDED, SSCI, A&amp;HCI, CPCI-S, CPCI-SSH, ESCI</i><br><i>Timespan=2000-2019</i> | Edit <input type="checkbox"/> <input type="checkbox"/> |
| 6  |      |                |                                                                                                                                       |                                                        |
| 7  |      |                |                                                                                                                                       |                                                        |
| 8  |      |                |                                                                                                                                       |                                                        |
| 9  | # 27 | <b>226,090</b> | TS=(heart failure)<br><i>Indexes=SCI-EXPANDED, SSCI, A&amp;HCI, CPCI-S, CPCI-SSH, ESCI</i><br><i>Timespan=2000-2019</i>               | Edit <input type="checkbox"/> <input type="checkbox"/> |
| 10 |      |                |                                                                                                                                       |                                                        |
| 11 |      |                |                                                                                                                                       |                                                        |
| 12 |      |                |                                                                                                                                       |                                                        |
| 13 | # 26 | <b>144,037</b> | TS=(coronary heart disease)<br><i>Indexes=SCI-EXPANDED, SSCI, A&amp;HCI, CPCI-S, CPCI-SSH, ESCI</i><br><i>Timespan=2000-2019</i>      | Edit <input type="checkbox"/> <input type="checkbox"/> |
| 14 |      |                |                                                                                                                                       |                                                        |
| 15 |      |                |                                                                                                                                       |                                                        |
| 16 |      |                |                                                                                                                                       |                                                        |
| 17 | # 25 | <b>1,959</b>   | TS=(transient ischaemic attack)<br><i>Indexes=SCI-EXPANDED, SSCI, A&amp;HCI, CPCI-S, CPCI-SSH, ESCI</i><br><i>Timespan=2000-2019</i>  | Edit <input type="checkbox"/> <input type="checkbox"/> |
| 18 |      |                |                                                                                                                                       |                                                        |
| 19 |      |                |                                                                                                                                       |                                                        |
| 20 |      |                |                                                                                                                                       |                                                        |
| 21 |      |                |                                                                                                                                       |                                                        |
| 22 | # 24 | <b>11,095</b>  | TS=(transient ischemic attack)<br><i>Indexes=SCI-EXPANDED, SSCI, A&amp;HCI, CPCI-S, CPCI-SSH, ESCI</i><br><i>Timespan=2000-2019</i>   | Edit <input type="checkbox"/> <input type="checkbox"/> |
| 23 |      |                |                                                                                                                                       |                                                        |
| 24 |      |                |                                                                                                                                       |                                                        |
| 25 |      |                |                                                                                                                                       |                                                        |
| 26 | # 23 | <b>278,508</b> | TS=(stroke)<br><i>Indexes=SCI-EXPANDED, SSCI, A&amp;HCI, CPCI-S, CPCI-SSH, ESCI</i><br><i>Timespan=2000-2019</i>                      | Edit <input type="checkbox"/> <input type="checkbox"/> |
| 27 |      |                |                                                                                                                                       |                                                        |
| 28 |      |                |                                                                                                                                       |                                                        |
| 29 |      |                |                                                                                                                                       |                                                        |
| 30 | # 22 | <b>75,433</b>  | TS=(chronic kidney disease)<br><i>Indexes=SCI-EXPANDED, SSCI, A&amp;HCI, CPCI-S, CPCI-SSH, ESCI</i><br><i>Timespan=2000-2019</i>      | Edit <input type="checkbox"/> <input type="checkbox"/> |
| 31 |      |                |                                                                                                                                       |                                                        |
| 32 |      |                |                                                                                                                                       |                                                        |
| 33 |      |                |                                                                                                                                       |                                                        |
| 34 | # 21 | <b>280,562</b> | TS=(obesity)<br><i>Indexes=SCI-EXPANDED, SSCI, A&amp;HCI, CPCI-S, CPCI-SSH, ESCI</i><br><i>Timespan=2000-2019</i>                     | Edit <input type="checkbox"/> <input type="checkbox"/> |
| 35 |      |                |                                                                                                                                       |                                                        |
| 36 |      |                |                                                                                                                                       |                                                        |
| 37 |      |                |                                                                                                                                       |                                                        |
| 38 | # 20 | <b>5</b>       | TS=(hyperlipidimia)<br><i>Indexes=SCI-EXPANDED, SSCI, A&amp;HCI, CPCI-S, CPCI-SSH, ESCI</i><br><i>Timespan=2000-2019</i>              | Edit <input type="checkbox"/> <input type="checkbox"/> |
| 39 |      |                |                                                                                                                                       |                                                        |
| 40 |      |                |                                                                                                                                       |                                                        |
| 41 |      |                |                                                                                                                                       |                                                        |
| 42 | # 19 | <b>2,534</b>   | TS=(hyperlipidaemia)<br><i>Indexes=SCI-EXPANDED, SSCI, A&amp;HCI, CPCI-S, CPCI-SSH, ESCI</i><br><i>Timespan=2000-2019</i>             | Edit <input type="checkbox"/> <input type="checkbox"/> |
| 43 |      |                |                                                                                                                                       |                                                        |
| 44 |      |                |                                                                                                                                       |                                                        |
| 45 |      |                |                                                                                                                                       |                                                        |
| 46 | # 18 | <b>21,065</b>  | TS=(hyperlipidemia)<br><i>Indexes=SCI-EXPANDED, SSCI, A&amp;HCI, CPCI-S, CPCI-SSH, ESCI</i><br><i>Timespan=2000-2019</i>              | Edit <input type="checkbox"/> <input type="checkbox"/> |
| 47 |      |                |                                                                                                                                       |                                                        |
| 48 |      |                |                                                                                                                                       |                                                        |
| 49 |      |                |                                                                                                                                       |                                                        |
| 50 |      |                |                                                                                                                                       |                                                        |
| 51 | # 17 | <b>2</b>       | TS=(hypertriglyceridimia)<br><i>Indexes=SCI-EXPANDED, SSCI, A&amp;HCI, CPCI-S, CPCI-SSH, ESCI</i><br><i>Timespan=2000-2019</i>        | Edit <input type="checkbox"/> <input type="checkbox"/> |
| 52 |      |                |                                                                                                                                       |                                                        |
| 53 |      |                |                                                                                                                                       |                                                        |
| 54 |      |                |                                                                                                                                       |                                                        |
| 55 | # 16 | <b>1,000</b>   | TS=(hypertriglyceridaemia)<br><i>Indexes=SCI-EXPANDED, SSCI, A&amp;HCI, CPCI-S, CPCI-SSH, ESCI</i><br><i>Timespan=2000-2019</i>       | Edit <input type="checkbox"/> <input type="checkbox"/> |
| 56 |      |                |                                                                                                                                       |                                                        |
| 57 |      |                |                                                                                                                                       |                                                        |
| 58 |      |                |                                                                                                                                       |                                                        |
| 59 | # 15 | <b>8,591</b>   | TS=(hypertriglyceridemia)                                                                                                             | Edit <input type="checkbox"/> <input type="checkbox"/> |
| 60 |      |                |                                                                                                                                       |                                                        |

1  
2  
3  
4  
5  
6  
7  
8  
9  
10  
11  
12  
13  
14  
15  
16  
17  
18  
19  
20  
21  
22  
23  
24  
25  
26  
27  
28  
29  
30  
31  
32  
33  
34  
35  
36  
37  
38  
39  
40  
41  
42  
43  
44  
45  
46  
47  
48  
49  
50  
51  
52  
53  
54  
55  
56  
57  
58  
59  
60

|      |         |                                                                                                                                       |                                                        |
|------|---------|---------------------------------------------------------------------------------------------------------------------------------------|--------------------------------------------------------|
|      |         | <i>Indexes=SCI-EXPANDED, SSCI, A&amp;HCI, CPCI-S, CPCI-SSH, ESCI</i><br><i>Timespan=2000-2019</i>                                     |                                                        |
| # 14 | 0       | TS=(hypercholesterolemia)<br><i>Indexes=SCI-EXPANDED, SSCI, A&amp;HCI, CPCI-S, CPCI-SSH, ESCI</i><br><i>Timespan=2000-2019</i>        | Edit <input type="checkbox"/> <input type="checkbox"/> |
| # 13 | 3,188   | TS=(hypercholesterolaemia)<br><i>Indexes=SCI-EXPANDED, SSCI, A&amp;HCI, CPCI-S, CPCI-SSH, ESCI</i><br><i>Timespan=2000-2019</i>       | Edit <input type="checkbox"/> <input type="checkbox"/> |
| # 12 | 27,232  | TS=(hypercholesterolemia)<br><i>Indexes=SCI-EXPANDED, SSCI, A&amp;HCI, CPCI-S, CPCI-SSH, ESCI</i><br><i>Timespan=2000-2019</i>        | Edit <input type="checkbox"/> <input type="checkbox"/> |
| # 11 | 4,539   | TS=(dyslipidaemia)<br><i>Indexes=SCI-EXPANDED, SSCI, A&amp;HCI, CPCI-S, CPCI-SSH, ESCI</i><br><i>Timespan=2000-2019</i>               | Edit <input type="checkbox"/> <input type="checkbox"/> |
| # 10 | 6       | TS=(dyslipidimia)<br><i>Indexes=SCI-EXPANDED, SSCI, A&amp;HCI, CPCI-S, CPCI-SSH, ESCI</i><br><i>Timespan=2000-2019</i>                | Edit <input type="checkbox"/> <input type="checkbox"/> |
| # 9  | 25,588  | TS=(dyslipidemia)<br><i>Indexes=SCI-EXPANDED, SSCI, A&amp;HCI, CPCI-S, CPCI-SSH, ESCI</i><br><i>Timespan=2000-2019</i>                | Edit <input type="checkbox"/> <input type="checkbox"/> |
| # 8  | 16,630  | TS=(type II diabetes)<br><i>Indexes=SCI-EXPANDED, SSCI, A&amp;HCI, CPCI-S, CPCI-SSH, ESCI</i><br><i>Timespan=2000-2019</i>            | Edit <input type="checkbox"/> <input type="checkbox"/> |
| # 7  | 173,805 | TS=(type 2 diabetes)<br><i>Indexes=SCI-EXPANDED, SSCI, A&amp;HCI, CPCI-S, CPCI-SSH, ESCI</i><br><i>Timespan=2000-2019</i>             | Edit <input type="checkbox"/> <input type="checkbox"/> |
| # 6  | 94,317  | TS=(Type 2 diabetes mellitus)<br><i>Indexes=SCI-EXPANDED, SSCI, A&amp;HCI, CPCI-S, CPCI-SSH, ESCI</i><br><i>Timespan=2000-2019</i>    | Edit <input type="checkbox"/> <input type="checkbox"/> |
| # 5  | 375,418 | #4 OR #3 OR #2 OR #1<br><i>Indexes=SCI-EXPANDED, SSCI, A&amp;HCI, CPCI-S, CPCI-SSH, ESCI</i><br><i>Timespan=2000-2019</i>             | Edit <input type="checkbox"/> <input type="checkbox"/> |
| # 4  | 113,713 | TS=(high blood pressure)<br><i>Indexes=SCI-EXPANDED, SSCI, A&amp;HCI, CPCI-S, CPCI-SSH, ESCI</i><br><i>Timespan=2000-2019</i>         | Edit <input type="checkbox"/> <input type="checkbox"/> |
| # 3  | 3,503   | TS=(uncontrolled blood pressure)<br><i>Indexes=SCI-EXPANDED, SSCI, A&amp;HCI, CPCI-S, CPCI-SSH, ESCI</i><br><i>Timespan=2000-2019</i> | Edit <input type="checkbox"/> <input type="checkbox"/> |
| # 2  | 4,063   | TS=(uncontrolled hypertension)<br><i>Indexes=SCI-EXPANDED, SSCI, A&amp;HCI, CPCI-S, CPCI-SSH, ESCI</i><br><i>Timespan=2000-2019</i>   | Edit <input type="checkbox"/> <input type="checkbox"/> |
| # 1  | 307,652 | <b>TOPIC:</b> (hypertension)<br><i>Indexes=SCI-EXPANDED, SSCI, A&amp;HCI, CPCI-S, CPCI-SSH, ESCI</i><br><i>Timespan=2000-2019</i>     |                                                        |

Table S1: List of 11 conditions included as comorbidity

|    | <b>Conditions</b>                                                     |
|----|-----------------------------------------------------------------------|
| 1  | Diabetes                                                              |
| 2  | Hypercholesterolemia/dyslipidemia/hyperlipidemia/hypertriglyceridemia |
| 3  | Obesity                                                               |
| 4  | Chronic kidney disease                                                |
| 5  | Stroke and or transient Ischemic attack                               |
| 6  | Coronary heart disease                                                |
| 7  | Heart failure                                                         |
| 8  | Peripheral vascular disease                                           |
| 9  | Atrial fibrillation                                                   |
| 10 | Depression                                                            |
| 11 | HIV                                                                   |

Table S2: Assessment of Risk of Bias (RoB)

|    | External validity                                                                             | Yes/No |   | Internal validity                                                                                        | Yes/No |
|----|-----------------------------------------------------------------------------------------------|--------|---|----------------------------------------------------------------------------------------------------------|--------|
| 1  | Was the target population representative of the population in relation to relevant variables? |        | 5 | Were data collected directly from the subjects (as opposed to a proxy)?                                  |        |
| 2  | Was the sampling frame a true or close representation of the target population?               |        | 6 | Was an acceptable case definition used in the study?                                                     |        |
| 3  | Was some form of random selection used to select the sample, OR was a census undertaken?      |        | 7 | Was the study instrument that measured the parameter of interest shown to have validity and reliability? |        |
| 4  | Was the likelihood of nonresponse bias minimal in the study?                                  |        | 8 | Was the same mode of data collection used for all subjects?                                              |        |
|    |                                                                                               |        | 9 | Were the numerator(s) and denominator(s) for the parameter of interest appropriate?                      |        |
| 10 | Summary item on the overall risk of study bias                                                |        |   |                                                                                                          |        |

*Adapted from Hoy D, Brooks P, Woolf A, Blyth F, March L, Bain C, et al. Assessing risk of bias in prevalence studies: modification of an existing tool and evidence of interrater agreement. Journal of clinical epidemiology. 2012;65(9):934-9.*

Table S3: Characteristics of studies in the prevalence of Uncontrolled hypertension in sub-Saharan Africa

|                              |                  |
|------------------------------|------------------|
| Year of publication (n = 18) | 2002-2019        |
| Period of inclusion (n = 18) | 2000-2019        |
| Mean age, years (n = 18)     | 56.7(±0.11)      |
| % of males (n = 18)          | 46.9(±0.18)      |
|                              |                  |
| <b>Comorbidities</b>         | <b>N studies</b> |

|    |                                            |    |
|----|--------------------------------------------|----|
|    | Diabetes                                   | 11 |
| 1  | HIV                                        | 3  |
| 2  | Stroke                                     | 2  |
| 3  | Atrial fibrillation                        | 1  |
| 4  | Chronic Kidney Disease (CKD)               | 1  |
| 5  | <b>sub-Saharan African regions</b>         |    |
| 6  | Eastern Africa                             | 4  |
| 7  | Western Africa                             | 3  |
| 8  | Central Africa                             | 1  |
| 9  | Central Africa                             | 10 |
| 10 | <b>Study design</b>                        |    |
| 11 | Cross sectional                            | 17 |
| 12 | Not reported                               | 1  |
| 13 | <b>Sampling</b>                            |    |
| 14 | Consecutive                                | 14 |
| 15 | Random                                     | 2  |
| 16 | Not reported                               | 2  |
| 17 | <b>Timing of data collection</b>           |    |
| 18 | Retrospectively                            | 5  |
| 19 | Prospectively                              | 12 |
| 20 | Not reported                               | 1  |
| 21 | <b>Data sources</b>                        |    |
| 22 | Medical records                            | 5  |
| 23 | Participants                               | 9  |
| 24 | from both medical records and participants | 3  |
| 25 | Not reported                               | 1  |
| 26 | <b>Study site</b>                          |    |
| 27 | Hospital                                   | 11 |
| 28 | Health Center                              | 7  |

Table S4: Meta-regression analysis for the variation of the prevalence of uncontrolled hypertension in people with comorbidity in SSA

| Variables (reference)                                           | Univariate analysis |              |                            |                    | Multivariate analysis |                               |  |  |
|-----------------------------------------------------------------|---------------------|--------------|----------------------------|--------------------|-----------------------|-------------------------------|--|--|
|                                                                 | N studies           | P value      | Coefficient (95% CI)       | R <sup>2</sup> , % | P-value               | Adjusted coefficient (95% CI) |  |  |
| <b>Year of publication (after 2015)</b>                         | 18                  | 0.402        | -0.0600 (-0.2080; 0.0879)  | -5.40              |                       |                               |  |  |
| <b>More females</b>                                             | 18                  | 0.114        | 0.1106 (-0.0297; 0.2508)   | 14.45              |                       |                               |  |  |
| <b>Risk of bias (low)</b>                                       | 18                  |              |                            | 19.80              |                       |                               |  |  |
| Moderate                                                        |                     | 0.990        | -0.0016 (-0.2682; 0.2649)  |                    |                       |                               |  |  |
| High                                                            |                     | 0.067        | 0.2106 (-0.0167; 0.4378)   |                    |                       |                               |  |  |
| <b>Sample size (small studies)</b>                              | 18                  |              |                            | -0.31              |                       |                               |  |  |
| Large studies                                                   |                     | 0.328        | 0.0736 (-0.0810; 0.2282)   |                    |                       |                               |  |  |
| <b>SSA regions (Eastern)</b>                                    | 18                  |              |                            | -15.88             |                       |                               |  |  |
| Western                                                         |                     | 0.929        | -0.0107 (-0.2650; 0.2435)  |                    |                       |                               |  |  |
| Central                                                         |                     | 0.572        | 0.1017 (-0.1102; 0.2706)   |                    |                       |                               |  |  |
| Southern                                                        |                     | 0.381        | 0.0802 (-0.1101; 0.2706)   |                    |                       |                               |  |  |
| <b>Comorbidities (atrial fibrillation)</b>                      | 18                  |              |                            | 14.44              |                       |                               |  |  |
| Chronic kidney disease                                          |                     | 0.205        | -0.2408 (-0.6310; 0.1493)  |                    | 0.483                 | -0.1333 (-0.5346; 0.2681)     |  |  |
| Diabetes                                                        |                     | 0.073        | -0.2610 (-0.5499; 0.0278)  |                    | 0.110                 | -0.2199 (-0.4972; 0.0574)     |  |  |
| HIV                                                             |                     | <b>0.036</b> | -0.3746 (-0.7215; -0.0277) |                    | 0.136                 | -0.2703 (-0.6389; 0.0983)     |  |  |
| Stroke                                                          |                     | 0.106        | -0.2678 (-0.6013; 0.0656)  |                    | 0.340                 | -0.1612 (-0.5146; 0.1922)     |  |  |
| <b>Setting (Health center)</b>                                  | 18                  |              |                            | -8.45              |                       |                               |  |  |
| Hospital                                                        |                     | 0.974        | 0.0025 (-0.1550; 0.1600)   |                    |                       |                               |  |  |
| <b>Sampling (Consecutive)</b>                                   | 16                  |              |                            |                    |                       |                               |  |  |
| Random                                                          |                     | 0.614        | -0.0534 (-0.2755; 0.1687)  | -5.95              |                       |                               |  |  |
| <b>BP target used (recommended comorbidity target not used)</b> | 18                  |              |                            | 26.48              |                       |                               |  |  |
| Recommended BP control used                                     |                     | <b>0.064</b> | -0.1228 (-0.2538; 0.0082)  |                    | 0.190                 | -0.1076 (-0.2764; 0.0612)     |  |  |
| <b>GNI (Below SSA average)</b>                                  | 18                  |              |                            |                    |                       |                               |  |  |

1  
2  
3  
4  
5  
6  
7  
8  
9  
10  
11  
12  
13  
14  
15  
16  
17  
18  
19  
20  
21  
22  
23  
24  
25  
26  
27  
28  
29  
30  
31  
32  
33  
34  
35  
36  
37  
38  
39  
40  
41  
42  
43  
44  
45  
46

|                   |    |       |                           |       |  |  |
|-------------------|----|-------|---------------------------|-------|--|--|
| Above SSA average |    | 0.675 | 0.0303 (-0.1204; 0.1810)  | -8.67 |  |  |
| <b>Mean age</b>   | 18 | 0.299 | -0.0097 (-0.0296; 0.0101) | 19.04 |  |  |

BP=Blood pressure

For peer review only

Table S5: Meta-regression analysis for the variation of the prevalence of uncontrolled hypertension in people with comorbidity in SSA

| Variables (reference)                                           | Univariate analysis |              |                            |                    | Multivariate analysis |                               |  |  |
|-----------------------------------------------------------------|---------------------|--------------|----------------------------|--------------------|-----------------------|-------------------------------|--|--|
|                                                                 | N studies           | P value      | Coefficient (95% CI)       | R <sup>2</sup> , % | P-value               | Adjusted coefficient (95% CI) |  |  |
| <b>Year of publication (after 2015)</b>                         | 18                  | 0.402        | -0.0600 (-0.2080; 0.0879)  | -5.40              |                       |                               |  |  |
| <b>More females</b>                                             | 18                  | 0.114        | 0.1106 (-0.0297; 0.2508)   | 14.45              |                       |                               |  |  |
| <b>Risk of bias (low)</b>                                       | 16                  |              |                            | -6.67              |                       |                               |  |  |
| Moderate                                                        |                     | 0.990        | -0.0016 (-0.2706; 0.2674)  |                    |                       |                               |  |  |
| <b>Sample size (small studies)</b>                              | 18                  |              |                            | -0.31              |                       |                               |  |  |
| Large studies                                                   |                     | 0.328        | 0.0736 (-0.0810; 0.2282)   |                    |                       |                               |  |  |
| <b>SSA regions (Eastern)</b>                                    | 18                  |              |                            | -15.88             |                       |                               |  |  |
| Western                                                         |                     | 0.929        | -0.0107 (-0.2650; 0.2435)  |                    |                       |                               |  |  |
| Central                                                         |                     | 0.572        | 0.1017 (-0.1102; 0.2706)   |                    |                       |                               |  |  |
| Southern                                                        |                     | 0.381        | 0.0802 (-0.1101; 0.2706)   |                    |                       |                               |  |  |
| <b>Comorbidities (atrial fibrillation)</b>                      | 18                  |              |                            | 14.44              |                       |                               |  |  |
| Chronic kidney disease                                          |                     | 0.205        | -0.2408 (-0.6310; 0.1493)  |                    | 0.483                 | -0.1333 (-0.5346; 0.2681)     |  |  |
| Diabetes                                                        |                     | 0.073        | -0.2610 (-0.5499; 0.0278)  |                    | 0.110                 | -0.2199 (-0.4972; 0.0574)     |  |  |
| HIV                                                             |                     | <b>0.036</b> | -0.3746 (-0.7215; -0.0277) |                    | 0.136                 | -0.2703 (-0.6389; 0.0983)     |  |  |
| Stroke                                                          |                     | 0.106        | -0.2678 (-0.6013; 0.0656)  |                    | 0.340                 | -0.1612 (-0.5146; 0.1922)     |  |  |
| <b>Setting (Health center)</b>                                  | 18                  |              |                            | -8.45              |                       |                               |  |  |
| Hospital                                                        |                     | 0.974        | 0.0025 (-0.1550; 0.1600)   |                    |                       |                               |  |  |
| <b>Sampling (Consecutive)</b>                                   | 16                  |              |                            |                    |                       |                               |  |  |
| Random                                                          |                     | 0.614        | -0.0534 (-0.2755; 0.1687)  | -5.95              |                       |                               |  |  |
| <b>BP target used (recommended comorbidity target not used)</b> | 18                  |              |                            | 26.48              |                       |                               |  |  |
| Recommended BP control used                                     |                     | <b>0.064</b> | -0.1228 (-0.2538; 0.0082)  |                    | 0.190                 | -0.1076 (-0.2764; 0.0612)     |  |  |
| <b>GNI (Below SSA average)</b>                                  | 18                  |              |                            |                    |                       |                               |  |  |
| Above SSA average                                               |                     | 0.675        | 0.0303 (-0.1204; 0.1810)   | -8.67              |                       |                               |  |  |
| <b>Mean age</b>                                                 | 18                  | 0.299        | -0.0097 (-0.0296; 0.0101)  | 19.04              |                       |                               |  |  |



1  
2  
3  
4  
5  
6  
7  
8  
9  
10  
11  
12  
13  
14  
15  
16  
17  
18  
19  
20  
21  
22  
23  
24  
25  
26  
27  
28  
29  
30  
31  
32  
33  
34  
35  
36  
37  
38  
39  
40  
41  
42  
43  
44  
45  
46

BP=Blood pressure

For peer review only

Table S6: Meta-regression analysis for the variation of the prevalence of uncontrolled hypertension in people with diabetes in SSA

| Variables (reference)                                           | Univariate analysis |              |                           |                    | Multivariate analysis |                               |
|-----------------------------------------------------------------|---------------------|--------------|---------------------------|--------------------|-----------------------|-------------------------------|
|                                                                 | N studies           | P value      | Coefficient (95% CI)      | R <sup>2</sup> , % | P value               | Adjusted coefficient (95% CI) |
| <b>Year of publication (after 2015)</b>                         | 11                  | 0.274        | 0.0793 (-0.0748; 0.2334)  | 18.20              |                       |                               |
| <b>More females</b>                                             | 11                  | 0.205        | 0.1157 (-0.0758; 0.3072)  | 16.26              |                       |                               |
| <b>Risk of bias (low)</b>                                       | 11                  |              |                           | -15.57             |                       |                               |
| Moderate                                                        |                     | 0.858        | -0.0278 (-0.3753; 0.3198) |                    |                       |                               |
| High                                                            |                     | 0.688        | 0.0711 (-0.3228; 0.4650)  |                    |                       |                               |
| <b>Sample size (small studies)</b>                              | 11                  |              |                           | -11.04             |                       |                               |
| Large studies                                                   |                     | 0.89         | .0115 (-0.1714; 0.1943)   |                    |                       |                               |
| <b>SSA regions (Eastern)</b>                                    | 11                  |              |                           | -18.36             |                       |                               |
| Western                                                         |                     | 0.815        | -.0341 (-0.3664; 0.2982)  |                    |                       |                               |
| Central                                                         |                     | 0.952        | .0101 (-0.3755; 0.3956)   |                    |                       |                               |
| Southern                                                        |                     | 0.500        | -0.0709 (-0.3067; 0.1649) |                    |                       |                               |
| <b>Setting (Health center)</b>                                  | 11                  |              |                           | -15.43             |                       |                               |
| Hospital                                                        |                     | 0.860        | .0160 (-0.1825; 0.2144)   |                    |                       |                               |
| <b>Sampling (Consecutive)</b>                                   | 10                  |              |                           |                    |                       |                               |
| Random                                                          |                     | <b>0.001</b> | -0.2366 (-0.3477 -0.1255) | 100.00             | <b>0.043</b>          | -0.1880 (-0.3686; -0.0074 )   |
| <b>BP target used (recommended diabetes BP target not used)</b> | 11                  |              |                           | 56.66              | 0.439                 | -0.0563 (-0.2188; 0.1062)     |
| Recommended diabetes BP control target used                     |                     | <b>0.054</b> | -0.1320 (-0.2671; 0.0030) |                    |                       |                               |
| <b>GNI (Below SSA average)</b>                                  | 11                  |              |                           |                    |                       |                               |
| Above SSA average                                               |                     | 0.401        | -0.0633 (-0.2256; 0.0991) | 3.10               |                       |                               |
| <b>Mean age</b>                                                 | 11                  | 0.296        | 0.0047 (-0.0046; 0.0139)  | -0.16              |                       |                               |

BP=Blood pressure

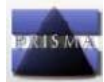

# PRISMA 2009 Checklist

| Section/topic                      | #  | Checklist item                                                                                                                                                                                                                                                                                              | Reported on page # |
|------------------------------------|----|-------------------------------------------------------------------------------------------------------------------------------------------------------------------------------------------------------------------------------------------------------------------------------------------------------------|--------------------|
| <b>TITLE</b>                       |    |                                                                                                                                                                                                                                                                                                             |                    |
| Title                              | 1  | Identify the report as a systematic review, meta-analysis, or both.                                                                                                                                                                                                                                         | 1                  |
| <b>ABSTRACT</b>                    |    |                                                                                                                                                                                                                                                                                                             |                    |
| Structured summary                 | 2  | Provide a structured summary including, as applicable: background; objectives; data sources; study eligibility criteria, participants, and interventions; study appraisal and synthesis methods; results; limitations; conclusions and implications of key findings; systematic review registration number. | 2                  |
| <b>INTRODUCTION</b>                |    |                                                                                                                                                                                                                                                                                                             |                    |
| Rationale                          | 3  | Describe the rationale for the review in the context of what is already known.                                                                                                                                                                                                                              | 3                  |
| Objectives                         | 4  | Provide an explicit statement of questions being addressed with reference to participants, interventions, comparisons, outcomes, and study design (PICOS).                                                                                                                                                  | 4                  |
| <b>METHODS</b>                     |    |                                                                                                                                                                                                                                                                                                             |                    |
| Protocol and registration          | 5  | Indicate if a review protocol exists, if and where it can be accessed (e.g., Web address), and, if available, provide registration information including registration number.                                                                                                                               | 4                  |
| Eligibility criteria               | 6  | Specify study characteristics (e.g., PICOS, length of follow-up) and report characteristics (e.g., years considered, language, publication status) used as criteria for eligibility, giving rationale.                                                                                                      | 4-5                |
| Information sources                | 7  | Describe all information sources (e.g., databases with dates of coverage, contact with study authors to identify additional studies) in the search and date last searched.                                                                                                                                  | 4-5                |
| Search                             | 8  | Present full electronic search strategy for at least one database, including any limits used, such that it could be repeated.                                                                                                                                                                               | Supplement file 1  |
| Study selection                    | 9  | State the process for selecting studies (i.e., screening, eligibility, included in systematic review, and, if applicable, included in the meta-analysis).                                                                                                                                                   | 5                  |
| Data collection process            | 10 | Describe method of data extraction from reports (e.g., piloted forms, independently, in duplicate) and any processes for obtaining and confirming data from investigators.                                                                                                                                  | 5                  |
| Data items                         | 11 | List and define all variables for which data were sought (e.g., PICOS, funding sources) and any assumptions and simplifications made.                                                                                                                                                                       | 5                  |
| Risk of bias in individual studies | 12 | Describe methods used for assessing risk of bias of individual studies (including specification of whether this was done at the study or outcome level), and how this information is to be used in any data synthesis.                                                                                      | 5-6                |
| Summary measures                   | 13 | State the principal summary measures (e.g., risk ratio, difference in means).                                                                                                                                                                                                                               | 6                  |
| Synthesis of results               | 14 | Describe the methods of handling data and combining results of studies, if done, including measures of consistency (e.g., $I^2$ ) for each meta-analysis.                                                                                                                                                   | 6                  |

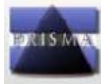

# PRISMA 2009 Checklist

Page 1 of 2

| Section/topic                 | #  | Checklist item                                                                                                                                                                                           | Reported on page # |
|-------------------------------|----|----------------------------------------------------------------------------------------------------------------------------------------------------------------------------------------------------------|--------------------|
| Risk of bias across studies   | 15 | Specify any assessment of risk of bias that may affect the cumulative evidence (e.g., publication bias, selective reporting within studies).                                                             | 7                  |
| Additional analyses           | 16 | Describe methods of additional analyses (e.g., sensitivity or subgroup analyses, meta-regression), if done, indicating which were pre-specified.                                                         | 6                  |
| <b>RESULTS</b>                |    |                                                                                                                                                                                                          |                    |
| Study selection               | 17 | Give numbers of studies screened, assessed for eligibility, and included in the review, with reasons for exclusions at each stage, ideally with a flow diagram.                                          | 7 and figure 1     |
| Study characteristics         | 18 | For each study, present characteristics for which data were extracted (e.g., study size, PICOS, follow-up period) and provide the citations.                                                             | 7-8                |
| Risk of bias within studies   | 19 | Present data on risk of bias of each study and, if available, any outcome level assessment (see item 12).                                                                                                | 10                 |
| Results of individual studies | 20 | For all outcomes considered (benefits or harms), present, for each study: (a) simple summary data for each intervention group (b) effect estimates and confidence intervals, ideally with a forest plot. | 9-12 and figure 3  |
| Synthesis of results          | 21 | Present results of each meta-analysis done, including confidence intervals and measures of consistency.                                                                                                  | 10-14              |
| Risk of bias across studies   | 22 | Present results of any assessment of risk of bias across studies (see Item 15).                                                                                                                          | 10                 |
| Additional analysis           | 23 | Give results of additional analyses, if done (e.g., sensitivity or subgroup analyses, meta-regression [see Item 16]).                                                                                    | 11-13              |
| <b>DISCUSSION</b>             |    |                                                                                                                                                                                                          |                    |
| Summary of evidence           | 24 | Summarize the main findings including the strength of evidence for each main outcome; consider their relevance to key groups (e.g., healthcare providers, users, and policy makers).                     | 14-16              |
| Limitations                   | 25 | Discuss limitations at study and outcome level (e.g., risk of bias), and at review-level (e.g., incomplete retrieval of identified research, reporting bias).                                            | 17                 |
| Conclusions                   | 26 | Provide a general interpretation of the results in the context of other evidence, and implications for future research.                                                                                  | 17                 |
| <b>FUNDING</b>                |    |                                                                                                                                                                                                          |                    |
| Funding                       | 27 | Describe sources of funding for the systematic review and other support (e.g., supply of data); role of funders for the systematic review.                                                               | 17                 |

From: Moher D, Liberati A, Tetzlaff J, Altman DG, The PRISMA Group (2009). Preferred Reporting Items for Systematic Reviews and Meta-Analyses: The PRISMA Statement. PLoS Med 6(7): e1000097. doi:10.1371/journal.pmed1000097

For more information, visit: [www.prisma-statement.org](http://www.prisma-statement.org).

# BMJ Open

## Prevalence of uncontrolled hypertension in people with comorbidities in sub-Saharan Africa: a systematic review and meta-analysis

|                                 |                                                                                                                                                                                                                                                                                                                                                                                                                                                                                                                                                                                                                                                                                                                     |
|---------------------------------|---------------------------------------------------------------------------------------------------------------------------------------------------------------------------------------------------------------------------------------------------------------------------------------------------------------------------------------------------------------------------------------------------------------------------------------------------------------------------------------------------------------------------------------------------------------------------------------------------------------------------------------------------------------------------------------------------------------------|
| Journal:                        | <i>BMJ Open</i>                                                                                                                                                                                                                                                                                                                                                                                                                                                                                                                                                                                                                                                                                                     |
| Manuscript ID                   | bmjopen-2020-045880.R1                                                                                                                                                                                                                                                                                                                                                                                                                                                                                                                                                                                                                                                                                              |
| Article Type:                   | Original research                                                                                                                                                                                                                                                                                                                                                                                                                                                                                                                                                                                                                                                                                                   |
| Date Submitted by the Author:   | 14-Jul-2021                                                                                                                                                                                                                                                                                                                                                                                                                                                                                                                                                                                                                                                                                                         |
| Complete List of Authors:       | Mohamed, Shukri; African Population and Health Research Center, Health and Systems for Health; University of Warwick, Academic Unit of Primary Care (AUPC) and the NIHR Global Health Research Unit on Improving Health in Slums, University of Warwick, Coventry, UK<br>Uthman, Olalekan; University of Warwick, Division of Health Sciences<br>Mutua, Martin; African Population and Health Research Center, Research Asiki, G; African Population and Health Research Center<br>Abba, Mustapha; University of Warwick, Academic Unit of Primary Care (AUPC) and the NIHR Global Health Research Unit on Improving Health in Slums, University of Warwick, Coventry, UK<br>Gill, Paramjit ; University of Warwick |
| <b>Primary Subject Heading</b>: | Epidemiology                                                                                                                                                                                                                                                                                                                                                                                                                                                                                                                                                                                                                                                                                                        |
| Secondary Subject Heading:      | Epidemiology, Global health, Public health                                                                                                                                                                                                                                                                                                                                                                                                                                                                                                                                                                                                                                                                          |
| Keywords:                       | PUBLIC HEALTH, EPIDEMIOLOGY, Hypertension < CARDIOLOGY                                                                                                                                                                                                                                                                                                                                                                                                                                                                                                                                                                                                                                                              |
|                                 |                                                                                                                                                                                                                                                                                                                                                                                                                                                                                                                                                                                                                                                                                                                     |

SCHOLARONE™  
Manuscripts



I, the Submitting Author has the right to grant and does grant on behalf of all authors of the Work (as defined in the below author licence), an exclusive licence and/or a non-exclusive licence for contributions from authors who are: i) UK Crown employees; ii) where BMJ has agreed a CC-BY licence shall apply, and/or iii) in accordance with the terms applicable for US Federal Government officers or employees acting as part of their official duties; on a worldwide, perpetual, irrevocable, royalty-free basis to BMJ Publishing Group Ltd ("BMJ") its licensees and where the relevant Journal is co-owned by BMJ to the co-owners of the Journal, to publish the Work in this journal and any other BMJ products and to exploit all rights, as set out in our [licence](#).

The Submitting Author accepts and understands that any supply made under these terms is made by BMJ to the Submitting Author unless you are acting as an employee on behalf of your employer or a postgraduate student of an affiliated institution which is paying any applicable article publishing charge ("APC") for Open Access articles. Where the Submitting Author wishes to make the Work available on an Open Access basis (and intends to pay the relevant APC), the terms of reuse of such Open Access shall be governed by a Creative Commons licence – details of these licences and which [Creative Commons](#) licence will apply to this Work are set out in our licence referred to above.

Other than as permitted in any relevant BMJ Author's Self Archiving Policies, I confirm this Work has not been accepted for publication elsewhere, is not being considered for publication elsewhere and does not duplicate material already published. I confirm all authors consent to publication of this Work and authorise the granting of this licence.

1  
2  
3 **Prevalence of uncontrolled hypertension in people with comorbidities in sub-Saharan**  
4  
5 **Africa: a systematic review and meta-analysis**  
6  
7

8 **Authors:** Shukri F. Mohamed, MPH<sup>1\*,2,3</sup> – Shukri.Mohamed@warwick.ac.uk  
9

10  
11 Olalekan A. Uthman, PhD<sup>4</sup> – olalekan.uthman@warwick.ac.uk  
12

13  
14 Martin K. Mutua, PhD<sup>2</sup> – mkavao@aphrc.org  
15

16  
17 Gershim Asiki, PhD<sup>2</sup> – [gasiki@aphrc.org](mailto:gasiki@aphrc.org)  
18

19  
20 Mustapha S. Abba, MPH<sup>1</sup> – Mustapha.Abba@warwick.ac.uk  
21

22  
23 Paramjit Gill, PhD<sup>1</sup> – P.Gill.1@warwick.ac.uk  
24

25  
26 \*Corresponding author: Shukri F. Mohamed – Shukri.Mohamed@warwick.ac.uk  
27

28  
29 Address: Academic Unit of Primary Care (AUPC) and the NIHR Global Health Research Unit on  
30  
31 Improving Health in Slums, University of Warwick, Coventry, UK  
32

33  
34 Email: [Shukri.Mohamed@warwick.ac.uk](mailto:Shukri.Mohamed@warwick.ac.uk); smohamed@aphrc.org  
35

36  
37 Phone number: +254 713 089457  
38

39  
40 **Author Affiliations**  
41

42  
43 1 Academic Unit of Primary Care (AUPC) and the NIHR Global Health Research Unit on Improving  
44  
45 Health in Slums, University of Warwick, Coventry, UK  
46

47  
48 2 Health and Systems for Health Unit, African Population and Health Research Center (APHRC),  
49  
50 Nairobi, Kenya  
51

52  
53 3 Lown Scholars Program, Department of Global Health and Population, Harvard T.H. Chan School of  
54  
55 Public Health, Boston, MA, USA.  
56

57  
58 4 Warwick-Centre for Applied Health Research and Delivery (WCAHRD), Warwick Medical School,  
59  
60 University of Warwick, Coventry, UK

**Word Count: 3231**

## Abstract

**Background:** The burden of uncontrolled hypertension in sub-Saharan Africa (SSA) is high and hypertension is known to co-exist with other chronic diseases such as kidney disease, diabetes among others. This is the first systematic review and meta-analysis to determine the burden of uncontrolled hypertension among patients with comorbidities in SSA.

**Methods:** A comprehensive search was conducted on MEDLINE, Excerpta Medica Database (Embase), and Web of Science to identify all relevant articles published between January 1<sup>st</sup>, 2000 and June 17<sup>th</sup>, 2021. We included studies that reported on the prevalence of uncontrolled hypertension among people in SSA who report taking antihypertensive treatment and have another chronic condition A random-effects meta-analysis was performed to obtain the pooled estimate of the prevalence of uncontrolled hypertension among patients with comorbid conditions while on treatment across studies in SSA.

**Results:** In all 20 articles were included for meta-analyses. Eleven articles were among diabetic patients, five articles were among HIV patients, two were among stroke patients while chronic kidney disease and atrial fibrillation had one article each. The pooled prevalence of uncontrolled hypertension among patients with comorbidities was 78.6% (95% CI, 71.1%-85.3%);  $I^2$  95.9%), varying from 73.1% in patients with stroke to 100.0% in patients with atrial fibrillation. Subgroup analysis showed differences in uncontrolled hypertension prevalence by various study-level characteristics

**Conclusion:** This study suggests a high burden of uncontrolled hypertension in people with comorbidities in SSA. Strategies to improve the control of hypertension among people with comorbidities are needed. PROSPERO registration number CRD42019108218.

Word count – 241

Key word – Uncontrolled hypertension, comorbidities, sub-Saharan Africa



## Strengths and limitations of this study

- A published comprehensive protocol was used to identify all available evidence without language restriction, reporting in accordance with PRISMA guidelines, search using multiple electronic databases, searching grey literature, contacting experts in the field for additional data sources to reduce study selection bias, and heterogeneity test by subgroup analyses and sensitivity analyses.
- The prevalence of uncontrolled hypertension (UHTN) in some comorbidities such as atrial fibrillation and chronic kidney disease were reported in single studies.
- Most of the studies included in the meta-analysis were hospital based studies that used non-random sampling procedures.
- There was substantial heterogeneity between the studies.

## Introduction

Hypertension is an important risk factor for cardiovascular diseases (CVDs) and a leading contributor to death globally [1]. An estimated 1.4 billion people have hypertension globally with three quarter (75%) of this population living in low-and –middle-income countries [2, 3]. Worldwide trends analysis based on a large dataset from multiple studies conducted between 1975 and 2015 in 200 countries showed no change in global mean blood pressure, but a a substantial downward trend in high income countries and a rise in low and middle income countries [4]. Levels of hypertension awareness, treatment and control improved by 2.9% in high income countries while in low-middle-income countries negligible improvement in awareness, treatment, and control were observed [3, 4]. The African region has the highest (30%) prevalence of hypertension compared to 18% in the Americas region [5]. In a systematic review and meta-analysis on hypertension in SSA, Ataklte et al [6], reported a (93%) high prevalence of uncontrolled hypertension (UHTN).

Hypertension often co-exists with comorbidities such as chronic kidney disease, diabetes, and hypercholesterolemia among others [7-10]. These comorbidities could explain part of the inadequacy in blood pressure control. Some studies conducted in Europe and the US found that patients with diabetes mellitus had a significantly increased risk of uncontrolled blood pressure [11, 12]. Another study conducted in the UK has shown that achieving optimal blood pressure control in patients with hypertension and type 2 diabetes produces an important decrease in the risks associated with diabetes [13].

In recent years, public health efforts to promote prevention, awareness and treatment of hypertension in SSA have intensified [14-17] but hypertension control remains low [18-22]. Despite several studies conducted on UHTN in people with comorbidities, pooled estimations of the burden are not available for comorbidities such as diabetes, dyslipidaemia, stroke, HIV, obesity, atrial fibrillation. From a clinical perspective, it is important to understand why patients on treatment are not attaining optimal blood control and whether their pre-existing comorbidities contribute to the

1  
2  
3 lack of control of blood pressure. Therefore, to inform policy, practice and the development of  
4  
5 guidelines for hypertension for integrated care among patients with comorbid conditions, it is critical  
6  
7 to understand the burden of UHTN in people with comorbidities. The purpose of this review is to  
8  
9 summarize the evidence on and estimate the prevalence of UHTN in patients with comorbidities in  
10  
11 SSA and to explore factors associated with UHTN in people with comorbidities .  
12  
13  
14

## 15 16 Methods

### 17 18 Protocol and registration

19  
20 The protocol for this systemic review and meta-analysis was registered on the International  
21  
22 Prospective Register of Systematic Reviews (PROSPERO CRD42019108218) and published [23]. The  
23  
24 reporting was done according to the Preferred Reporting Items for Systematic reviews and Meta-  
25  
26 Analyses (PRISMA-P) guidelines [24].  
27  
28  
29

### 30 31 Search Strategy

32  
33 We systematically searched MEDLINE via Ovid, Excerpta Medica Database (Embase), and Web of  
34  
35 Science from January 1<sup>st</sup>, 2000 to June 17<sup>th</sup>, 2021. The search strategy included the following relevant  
36  
37 terms: *uncontrolled hypertension, hypertension, uncontrolled blood pressure, high blood pressure , a*  
38  
39 *list of comorbidities, and sub-Saharan Africa (Detailed search strategy list is attached as supplement*  
40  
41 *(Supplement file S1). Additionally, the reference lists of the included studies were reviewed to identify*  
42  
43 *other relevant studies.*  
44  
45  
46

### 47 48 Eligibility criteria

49  
50 Studies were included if (1) they provided primary data on the prevalence of hypertension in  
51  
52 accordance with the seventh report of the Joint National Committee (JNC7) among those who reported  
53  
54 taking antihypertensive treatment and had a comorbid condition, (2) participants had been diagnosed  
55  
56 with one of the comorbidities of interest – diabetes, dyslipidemia, obesity, chronic kidney disease,  
57  
58 stroke or transient ischemic attack, coronary heart disease, heart failure, peripheral vascular disease,  
59  
60

1  
2  
3 atrial fibrillation, depression and HIV (Table S2), (3) participants were 15 and above years, (4) the study  
4 was published in any language, and (5) the study was conducted in a sub-Saharan Africa. The following  
5 types of study designs were excluded: (1) case-control studies, commentaries, editorials, letters,  
6 qualitative studies, and systematic reviews; (2) studies that included hypertension prevalence but did  
7 not report on the prevalence of hypertension among those on antihypertensive medication; and (3)  
8 studies of pregnancy-related hypertension.  
9  
10  
11  
12  
13  
14  
15

### 16 17 **Study selection**

18  
19  
20 Two researchers independently screened the titles and abstracts (SFM & ASM). Two researchers (SFM  
21 & ASM) also assessed full-text reviews of the articles independently for final inclusion. The reference  
22 lists of potentially relevant publications were manually searched for additional publications.  
23 Disagreements were resolved by consensus. For multi-national studies, data were separated to show  
24 the estimate at the country level.  
25  
26  
27  
28  
29  
30  
31

### 32 **Data items and collection process**

33  
34  
35 SFM and ASM independently screened the full texts of included studies. SFM extracted data from the  
36 selected studies, and ASM checked the data for accuracy. A standardized data extraction table was  
37 created (Table 1) and included the following data from all eligible articles: first author name, year of  
38 publication, language, country of the study, study design, sample size, study period, study setting,  
39 sampling method, the timing of data collection, data source, use of comorbidity specific hypertension  
40 control cutoff, male proportion, age of participants (mean or median), type of comorbidity (diabetes,  
41 stroke, HIV, chronic kidney disease, atrial fibrillation), and main outcome of interest uncontrolled  
42 hypertension proportion or the data to compute it.  
43  
44  
45  
46  
47  
48  
49  
50  
51  
52

### 53 **Risk of bias in individual studies**

54  
55  
56 A tool developed by Hoy et.al [25] for prevalence studies was adapted and used to assess the  
57 methodological quality of included studies by evaluating the extent to which they addressed bias in 9  
58  
59  
60

1  
2  
3 areas of internal and external validity (Table S3). Each of the nine areas was scored one if yes (high  
4 quality) and zero if no (poor quality), and a total quality score was calculated by summing the  
5 individual scores. Total scores ranged from 0 to 9, with higher scores indicating higher quality. Studies  
6 were then classified as having a low (>8), moderate (6–8), or high ( $\leq 5$ ) risk of bias. Two researchers  
7 (SFM and MKM) independently assessed each of the included publications and disagreements was  
8 resolved through discussion.  
9

### 17 **Patient and Public Involvement**

20 This research was done without patient involvement. There was no involvement of patients or  
21 members of the public in the design, or conduct, or reporting, or dissemination plans of this  
22 research.  
23  
24  
25

### 27 **Synthesis of results**

30 The statistical approach used in this meta-analysis followed the study protocol [23]. Crude numerators  
31 and denominators from the individual studies were used to recalculate the study-specific unadjusted  
32 prevalence estimates. Variances of the study-specific estimates were stabilized using the double  
33 arcsine transformation to minimise the effect of studies with very small or very large prevalence  
34 estimates on the overall estimate (16) and then a random-effects meta-analysis was performed (17)  
35 to determine the pooled estimate of the prevalence of UHTN among patients with comorbidities  
36 overall and also among people with diabetes, HIV and stroke separately while on antihypertensive  
37 treatment across the included studies in SSA. Prevalence estimates were also summarised by  
38 comorbidities, publication year, sample size, study setting, sampling, risk of bias, gender  
39 proportion, mean age and geographic regions.  
40  
41  
42  
43  
44  
45  
46  
47  
48  
49  
50  
51

52  
53 Heterogeneity was explored using Cochrane's Q and quantified by  $I^2$  statistics [26, 27]. Subgroup  
54 analyses were performed based on the following; gender proportion of participants, patient  
55 comorbidities, study design, study setting, sample size, use of recommended comorbidity specific  
56  
57  
58  
59  
60

1  
2  
3 blood pressure control cut-offs, countries, regions (Eastern, Western, Central, and Southern Africa),  
4 and by Gross National Income (GNI) were performed to identify the possible sources of  
5 heterogeneity. Sensitivity analyses were performed to assess the robustness of the findings by  
6 excluding studies with a high risk of bias.  
7  
8  
9

10  
11  
12 Funnel plots and Egger asymmetry test were used to assess publication bias, with  $P < .10$  considered  
13 to be statistically significant for publication bias [28]. Inter-rater agreements between the researchers  
14 involved in study inclusion and those involved in the identification of risk of bias were assessed using  
15  $\kappa$  Cohen's coefficient (20).  
16  
17  
18  
19  
20  
21

22 All analyses were performed using 'metaprop' routine using StataSE version 16 (StataCorp LLC).  
23  
24  
25

## 26 Results

### 27 Study selection

28 From the electronic database search, 8492 records were identified. An additional 35 articles were  
29 identified through reference tracing and from other sources. After duplicate removal, 5610 remained  
30 for the title and abstract screening. After screening, we found 5085 records to be irrelevant and  
31 excluded them. The full texts of 525 articles and reports were retrieved and assessed for eligibility,  
32 resulting in the inclusion of 20 studies for the meta-analysis (figure 1). The inter-rater agreement for  
33 study selection was 0.77.  
34  
35  
36  
37  
38  
39  
40  
41  
42  
43

### 44 Study characteristics

45 Table 1 and Table S4 provide detailed information on the included studies. In total, 3,510 participants  
46 were included across 20 studies. Most of the studies were cross-sectional (19, 95%), in English (19,  
47 95%), hospital-based (12, 60%), used consecutive sampling (16, 80%), and prospectively collected data  
48 (14, 70%). The mean (SD) participant age from the 20 studies [29-48] providing this information was  
49 56.8 (0.12) years. Study sample sizes ranged from 10 to 567 participants. The proportion of male  
50 participants in the included studies was reported in all studies and it ranged from 21.4% to 60.9% [29-  
51 48]. Of the included studies, 11 [30-32, 34, 35, 39-43, 46] reported on diabetes, five [36, 38, 44, 47,  
52 48].  
53  
54  
55  
56  
57  
58  
59  
60

1  
2  
3 48] reported on HIV, two [29, 45] reported on stroke, and one each reported on chronic kidney disease  
4  
5 [33] and atrial fibrillation [37]. None of the included studies reported on obesity, dyslipidaemia,  
6  
7 coronary heart disease, heart failure, peripheral heart disease, and depression.  
8  
9  
10  
11  
12  
13  
14  
15  
16  
17  
18  
19  
20  
21  
22  
23  
24  
25  
26  
27  
28  
29  
30  
31  
32  
33  
34  
35  
36  
37  
38  
39  
40  
41  
42  
43  
44  
45  
46  
47  
48  
49  
50  
51  
52  
53  
54  
55  
56  
57  
58  
59  
60

For peer review only

Table 1: Characteristics of the Included Studies

| Study                         | Country      | Age<br>(Mean/Median) | Study period        | Study site    | Sampling    | Male % | Sample<br>size | UHTN% | Risk of<br>bias |
|-------------------------------|--------------|----------------------|---------------------|---------------|-------------|--------|----------------|-------|-----------------|
| <b>Atrial Fibrillation</b>    |              |                      |                     |               |             |        |                |       |                 |
| Jardine et.al,2014            | South Africa | 67±13                | Feb 2010 - Mar 2011 | Health center | Consecutive | 59.9   | 198            | 100.0 | High            |
| <b>Chronic Kidney Disease</b> |              |                      |                     |               |             |        |                |       |                 |
| Babua et.al 2015              | Uganda       | 42.8                 | Jun - Feb 2013      | Hospital      | Consecutive | 51.2   | 191            | 76.0  | Low             |
| <b>Diabetes</b>               |              |                      |                     |               |             |        |                |       |                 |
| Abera et.al, 2016             | Ethiopia     | 56.3±10              | Aug - Jan 2015      | Hospital      | Consecutive | 59.9   | 382            | 85.0  | Low             |
| Adeniyi et.al, 2016           | South Africa | 61.3±11.8            | Jul to Nov 2013     | Hospital      | Consecutive | 28.3   | 265            | 75.5  | Low             |
| Agaba et.al, 2009             | Nigeria      | 51±12                | Jun - Sept 2004     | Hospital      | Consecutive | 40.2   | 79             | 70.9  | Moderate        |
| Choukem et.al 2006            | Cameroon     | 56.6±13.3            | 6 months            | Hospital      | Consecutive | 50.5   | 98             | 79.6  | Low             |
| Cohen et.al, 2010             | Malawi       | 53.2±14.0            | Mar - Jun 2007      | Hospital      | Consecutive | 39.8   | 253            | 72.7  | Low             |
| Mwita et.al, 2012             | Tanzania     | 51.6±11.2            | Feb - Sep 2010      | Health center | Consecutive | 38.0   | 67             | 66.0  | Low             |
| Pinchevsky et.al, 2017        | South Africa | 53.9±11.5            | May - Aug 2015      | Health center | Consecutive | 46.1   | 459            | 78.0  | Low             |
| Pinchevsky et.al, 2013        | South Africa | 63 ± 11.9            | July 2008-2009      | Hospital      | Random      | 44.6   | 567            | 54.2  | Low             |
| Rotchford,2002                | South Africa | 56.5±10.4            | 2 months in 1999    | Hospital      | Consecutive | 26.9   | 129            | 86.0  | Low             |
| Soetedjo et.al 2018           | South Africa | 53±9.9               | Dec 2013 - Jun 2016 | Health center | Consecutive | 35.9   | 48             | 66.7  | Low             |
| Yameogo et.al,2012            | Senegal      | 58.2±9.2             | Mar 2007 - Jul 2008 | Hospital      | NR          | 25.5   | 52             | 80.8  | High            |
| <b>HIV</b>                    |              |                      |                     |               |             |        |                |       |                 |
| Fiseha et.al, 2019            | Ethiopia     | 37±10.3              | Jan - May 2018      | Hospital      | Consecutive | 33.1   | 31             | 100.0 | Low             |
| Hyle et.al, 2019              | South Africa | 38.4±8.3             | 2015                | Health center | Consecutive | 33.0   | 54             | 83.0  | Low             |
| Manavalan et.al, 2020         | Tanzania     | NR                   | Oct 2016 - Dec 2018 | Health center | Consecutive | 21.4   | 10             | 100.0 | Low             |
| Muddu et.al, 2019             | Uganda       | 43.6±11.5            | Jan 2014 - Jan 2017 | Health center | Consecutive | 39.4   | 91             | 41.8  | Low             |
| Steffen et.al, 2017           | Malawi       | 36±9.3               | Not indicated       | Health center | NR          | 42.8   | 35             | 77.1  | Moderate        |
| <b>Stroke</b>                 |              |                      |                     |               |             |        |                |       |                 |
| Abboud et.al, 2013            | South Africa | 63.5±11.3            | Jan 2007 - Dec 2008 | Hospital      | Random      | 58.5   | 217            | 88.0  | Low             |
| Wahab et.al, 2017             | Nigeria      | 59±13.1              | Feb 2009 - Apr 2011 | Hospital      | Consecutive | 60.9   | 284            | 60.2  | Low             |

NR=Not reported



### Risk of Bias Assessment

The risk of bias was assessed in all included studies of the 20 included studies. Most studies were categorized as having some concern for bias with two (10%) [37, 46] studies being deemed to have high risk of bias. Two studies [32, 44] (11.1%) had a moderate risk of bias while 16 studies [29-31, 33-36, 38-43, 45, 47, 48] (80%) had a low risk of bias. The inter-rater agreement for the risk of bias assessment was 0.65. Additional details on the domains assessed are included in the risk of bias summary table in the supplement (Table S3).

### Prevalence of uncontrolled hypertension among patients with comorbidities

Twenty publications reported on uncontrolled hypertension among patients with comorbidities (Table 1). The majority of the studies were from South Africa (8, 40%) [29, 31, 36, 37, 40-43]. Uganda [33, 38], Nigeria [32, 45], Malawi [35, 44] Ethiopia [30, 47], and Tanzania [39, 48], had two (10%) studies each while Senegal [46] and Cameroon [34] had one study (5%) each. The reported prevalence of UHTN among people with comorbidities ranged from 41.8% (95% CI, 32.2%-52.0%) in Uganda to 100.0% (95% CI, 98.1%-100.0%) in South Africa. The pooled uncontrolled hypertension prevalence estimate in patients with comorbidities from the random-effects meta-analysis was 78.6% (95% CI, 71.1%-85.3%). Substantial heterogeneity ( $I^2 = 95.9\%$ ;  $P < .0001$ ) existed in the included studies (Table 2). Absence of publication bias is suggested by the symmetrical visual inspection of the funnel plot, confirmed by the Egger's test ( $P < .001$ ) (Figure 2).

Table 2: Meta-analysis results for the prevalence of uncontrolled hypertension in people with comorbidities in sub-Saharan Africa

|                        | Prevalence<br>(95%CI) | No of<br>studies | Number<br>of<br>Participants | $I^2$<br>(95%CI) | $p$ <sup>heterogeneity</sup> |
|------------------------|-----------------------|------------------|------------------------------|------------------|------------------------------|
| Overall                | 78.6 (67.9-83.0)      | 20               | 3510                         | 96.1             | <0.0001                      |
| By comorbidity         |                       |                  |                              |                  |                              |
| Atrial fibrillation    | 100.0 (98.1-100.0)    | 1                | 198                          | -                | -                            |
| Chronic kidney disease | 75.9 (69.4-81.4)      | 1                | 191                          | -                | -                            |
| Diabetes               | 74.5 (67.1-81.3)      | 11               | 2399                         | 93.1             | <0.001                       |

|    |                             |                                  |    |      |      |        |
|----|-----------------------------|----------------------------------|----|------|------|--------|
| 1  |                             |                                  |    |      |      |        |
| 2  |                             |                                  |    |      |      |        |
| 3  | HIV                         | 83.7 (56.0-99.5)                 | 5  | 221  | 94.4 | <0.001 |
| 4  | Stroke                      | 73.1 (69.1-76.9)                 | 2  | 501  | -    | -      |
| 5  |                             |                                  |    |      |      |        |
| 6  | By region                   |                                  |    |      |      |        |
| 7  | Eastern                     | 80.8 (64.6-93.1)                 | 6  | 772  | 94.7 | <0.001 |
| 8  | Western                     | 69.8 (57.0-81.2)                 | 3  | 415  | -    | -      |
| 9  | Central                     | 79.6 (70.6-86.4)                 | 1  | 98   | -    | -      |
| 10 | Southern                    | 79.8 (68.1-89.4)                 | 10 | 2225 | 97.3 | <0.001 |
| 11 |                             |                                  |    |      |      |        |
| 12 | By risk of bias             |                                  |    |      |      |        |
| 13 | Low                         | 76.4 (69.3-82.8)                 | 16 | 3146 | 94.4 | <0.001 |
| 14 | Moderate                    | 72.0 (63.3-80.0)                 | 2  | 114  | -    | -      |
| 15 | High                        | 99.0 (97.1-100.0)                | 2  | 250  | -    | -      |
| 16 |                             |                                  |    |      |      |        |
| 17 | By study size               |                                  |    |      |      |        |
| 18 | Small studies               | 77.6 (66.0-87.4)                 | 10 | 565  | 88.6 | <0.001 |
| 19 | Large studies               | 79.5 (69.0-83.0)                 | 10 | 2945 | 97.7 | <0.001 |
| 20 |                             |                                  |    |      |      |        |
| 21 | By period of publication    |                                  |    |      |      |        |
| 22 | Before 2015                 | 79.4 (66.5-89.9)                 | 10 | 1851 | 97.3 | <0.001 |
| 23 | After 2015                  | 77.3 (68.0-85.4)                 | 10 | 1659 | 93.1 | <0.001 |
| 24 |                             |                                  |    |      |      |        |
| 25 | By gender proportion        |                                  |    |      |      |        |
| 26 | More females                | 75.4 (67.6-82.5)                 | 14 | 2140 | 92.5 | <0.001 |
| 27 | More males                  | 84.1 (69.5-94.7)                 | 6  | 1370 | 97.6 | <0.001 |
| 28 |                             |                                  |    |      |      |        |
| 29 | By sampling                 |                                  |    |      |      |        |
| 30 | Consecutive                 | 76.1 (67.6-83.7)                 | 18 | 2639 | 95.6 | <0.001 |
| 31 | Random                      | 64.5 (61.1-67.9)                 | 2  | 784  | -    | -      |
| 32 |                             |                                  |    |      |      |        |
| 33 | By setting                  |                                  |    |      |      |        |
| 34 | Hospital                    | 78.4 (69.8-86.0)                 | 12 | 2548 | 95.3 | <0.001 |
| 35 | Health center               | 79.4(60.7-93.4)                  | 8  | 962  | 96.8 | <0.001 |
| 36 |                             |                                  |    |      |      |        |
| 37 | By comorbidity HTN target   |                                  |    |      |      |        |
| 38 | Comorbidity target used     | 70.7 (61.3-79.2)                 | 13 | 1776 | 93.3 | <0.001 |
| 39 | Comorbidity target not used | 83.0 (72.4-91.4)                 | 7  | 1734 | 96.3 | <0.001 |
| 40 |                             |                                  |    |      |      |        |
| 41 | By Gross National Income    |                                  |    |      |      |        |
| 42 | Below SSA Average           | 78.6 (68.2-87.4)                 | 9  | 1179 | 91.9 | <0.001 |
| 43 | Above SSA average           | 78.3 (66.1-88.4)                 | 11 | 2331 | 97.3 | <0.001 |
| 44 |                             |                                  |    |      |      |        |
| 45 | SSA=sub-Saharan Africa      | <b>P<sup>egger</sup> = 0.381</b> |    |      |      |        |

Subgroup analysis revealed differences in uncontrolled hypertension prevalence by comorbidity (Figure 3). Adults with atrial fibrillation reported the highest uncontrolled hypertension estimate (100.0% [95% CI, 98.1%- 100.0%]), followed by adults with HIV (83.7% [95% CI, 56.0%-99.5%]). The lowest pooled uncontrolled hypertension prevalence estimate was found in adults with stroke (73.1% [95% CI, 69.1%-76.9%]). Pooled UHTN prevalence differed by geographic regions; studies conducted in the Eastern, Southern and Central region reported higher prevalence's (80.8% [95% CI, 64.6%-

93.1%]), (79.8% [95% CI, 68.2%-89.3%]) and (79.6% [95% CI, 70.6%-86.4%]) respectively than studies conducted in the Western region (69.8% [95% CI, 57.0%-81.2%]). Prevalence varied by sample size; large studies reported a slightly higher prevalence (79.5% [95% CI, 69.1%-88.2%]) compared to small studies (77.6% [95% CI, 66.0%-87.4%]) (table 2). Studies that used the recommended hypertension control value for each comorbidity reported lower pooled prevalence of uncontrolled hypertension (75.8 [95% CI, 66.4-84.1]) compared to those that did not use the recommended comorbidity specific blood pressure control value (83.0 [95% CI, 72.4-91.4]).

In the univariable analysis, heterogeneity was explained by being female (11.3%), risk of bias (18.4%), by regions (15.8%), comorbidities (3.5%), and using target blood pressure (21.3%) (Table S5). However only comorbidities and risk of bias were significant at 10% and these were added to the multivariable meta-regression analysis. The results from the multivariable meta-regression were not statistically significant. Sensitivity analysis conducted by excluding studies that had high risk of bias from the analysis did not show any influence on the robustness of the findings in the pooled analyses.

Sensitivity analysis done by excluding studies with high risk of bias from the analysis did not show any influence on the robustness of the findings in the pooled analysis.

### **Prevalence of uncontrolled hypertension among patients with diabetes**

The prevalence of uncontrolled hypertension prevalence estimate among patients with diabetes was reported in 11 studies [30-32, 34, 35, 39-43, 46], with a total of 2399 participants. Uncontrolled hypertension prevalence in this group ranged from 54% (95% CI, 50%- 58%) to 85% (95% CI, 78%-90%), with a pooled estimate of 74.5% (95% CI, 67.1%-81.3%) (Table 2). Substantial heterogeneity ( $I^2 = 93.1\%$ ;  $P < .001$ ) was observed in the included studies (Figure 2). Publication bias was not evident from the visual inspection of the funnel plot (Figure 4).

Subgroup analysis revealed differences in uncontrolled hypertension prevalence among people with diabetes (Table 3). There were differences noted by sample size; large studies reported a higher

prevalence (75.5% [95% CI, 67.1%-81.3%]) compared to small studies (73.3% [95% CI, 68.2%-79.3%]) (table 2). Pooled UHTN prevalence differed by geographic regions; studies conducted in the Eastern reported the highest pooled prevalence (82.5% [95% CI, 80.4%-87.1%]) while studies in conducted in the Southern region reported the lowest pooled prevalence (72.5% [95% CI, 62.0%-81.8%]). Gender differences were also noted; studies with more male participants had higher pooled prevalence (72.5% [95% CI, 64.4%-79.9%]) compared to studies with more female participants. Studies conducted after 2015 had higher pooled prevalence of UHTN among people with diabetes compared to studies conducted before 2015. Studies that used the recommended diabetes hypertension cutoff (BP<130/85 mmHg) to define blood pressure control reported lower UHTN prevalences compared to those that did not use the recommended hypertension control value. Studies that had below the average SSA GNI reported a higher prevalence of UHTN (77.3 [95% CI, 69.7-84.2]) compared to studies with above the average SSA GNI (72.3 [95% CI, 61.0-82.3]).

In the univariable analysis, the use of the recommended hypertension control value for diabetes explained the most of the heterogeneity (56.7%) observed while sampling explained 100% of the heterogeneity (Table S6). In the final multivariable model, the sampling method used was associated with uncontrolled hypertension and explained most of the heterogeneity.

Table 3: Meta-analysis results for the prevalence of uncontrolled hypertension in people with diabetes in sub-Saharan Africa

|                 | Prevalence<br>(95%CI) | No of<br>studies | Number of<br>Participants | I <sup>2</sup><br>(95%CI) | p <sub>heterogeneity</sub> |
|-----------------|-----------------------|------------------|---------------------------|---------------------------|----------------------------|
| Overall         | 74.5 (67.1-81.3)      | 11               | 2399                      | 93.1                      | <0.001                     |
| By region       |                       |                  |                           |                           |                            |
| Eastern         | 82.5 (78.8-85.9)      | 2                | 449                       | -                         | -                          |
| Western         | 75.0 (67.1-82.1)      | 2                | 131                       | -                         | -                          |
| Central         | 79.6 (70.6-86.4)      | 1                | 98                        | -                         | -                          |
| Southern        | 72.5 (62.0-81.8)      | 6                | 1721                      | 94.9                      | <0.001                     |
| By risk of bias |                       |                  |                           |                           |                            |
| Low             | 74.2 (65.8-81.9)      | 9                | 2268                      | 94.4                      | <0.001                     |
| Moderate        | 70.9 (60.1-78.8)      | 1                | 79                        | -                         | -                          |
| High            | 80.8 (68.1-89.2)      | 1                | 52                        | -                         | -                          |
| By study size   |                       |                  |                           |                           |                            |
| Small studies   | 73.25 (66.8-79.3)     | 5                | 344                       | 40.6                      | 0.15                       |

|    |                           |                                     |   |      |      |        |
|----|---------------------------|-------------------------------------|---|------|------|--------|
| 1  |                           |                                     |   |      |      |        |
| 2  |                           |                                     |   |      |      |        |
| 3  | Large studies             | 75.5 (64.82-84.8)                   | 6 | 2055 | 96.4 | <0.001 |
| 4  | By period of publication  |                                     |   |      |      |        |
| 5  | Before 2015               | 72.9 (62.4-82.3)                    | 4 | 1245 | 92.4 | <0.001 |
| 6  | After 2015                | 78.0 (71.9-83.6)                    | 7 | 1154 | 79.6 | <0.001 |
| 7  | By gender proportion      |                                     |   |      |      |        |
| 8  | More females              | 72.5 (64.4-79.9)                    | 9 | 1919 | 92.2 | <0.001 |
| 9  | More males                | 83.9 (80.4-87.1)                    | 2 | 480  | -    | -      |
| 10 | By sampling               |                                     |   |      |      |        |
| 11 | Consecutive               | 76.7 (72.3-80.9)                    | 9 | 1780 | 75.2 | <0.001 |
| 12 | Random                    | 54.1 (50.0-58.2)                    | 1 | 567  | -    | -      |
| 13 | By setting                |                                     |   |      |      |        |
| 14 | Hospital                  | 75.7 (66.0-84.3)                    | 8 | 1825 | 94.9 | <0.001 |
| 15 | Health center             | 71.6 (61.5-80.8)                    | 3 | 574  | -    | -      |
| 16 | By comorbidity HTN target |                                     |   |      |      |        |
| 17 | Comorbidity target used   | 70.1 (57.4-81.5)                    | 5 | 863  | 90.1 | <0.001 |
| 18 | Comorbidity target not    |                                     |   |      |      |        |
| 19 | used                      | 78.2 (73.1-82.9)                    | 6 | 1536 | 79.3 | <0.001 |
| 20 | By Gross National Income  |                                     |   |      |      |        |
| 21 | Below SSA Average         | 77.3 (69.7-84.2)                    | 5 | 852  | 81.1 | <0.001 |
| 22 | Above SSA average         | 72.3 (61.0-82.3)                    | 6 | 1547 | 94.9 | <0.001 |
| 23 | SSA=sub-Saharan Africa    | <b>P<sub>egger</sub> &lt; 0.001</b> |   |      |      |        |
| 24 |                           |                                     |   |      |      |        |
| 25 |                           |                                     |   |      |      |        |
| 26 |                           |                                     |   |      |      |        |
| 27 |                           |                                     |   |      |      |        |
| 28 |                           |                                     |   |      |      |        |
| 29 |                           |                                     |   |      |      |        |
| 30 |                           |                                     |   |      |      |        |
| 31 |                           |                                     |   |      |      |        |
| 32 |                           |                                     |   |      |      |        |
| 33 |                           |                                     |   |      |      |        |
| 34 |                           |                                     |   |      |      |        |
| 35 |                           |                                     |   |      |      |        |
| 36 |                           |                                     |   |      |      |        |
| 37 |                           |                                     |   |      |      |        |
| 38 |                           |                                     |   |      |      |        |
| 39 |                           |                                     |   |      |      |        |
| 40 |                           |                                     |   |      |      |        |
| 41 |                           |                                     |   |      |      |        |
| 42 |                           |                                     |   |      |      |        |
| 43 |                           |                                     |   |      |      |        |
| 44 |                           |                                     |   |      |      |        |
| 45 |                           |                                     |   |      |      |        |
| 46 |                           |                                     |   |      |      |        |
| 47 |                           |                                     |   |      |      |        |
| 48 |                           |                                     |   |      |      |        |
| 49 |                           |                                     |   |      |      |        |
| 50 |                           |                                     |   |      |      |        |
| 51 |                           |                                     |   |      |      |        |
| 52 |                           |                                     |   |      |      |        |
| 53 |                           |                                     |   |      |      |        |
| 54 |                           |                                     |   |      |      |        |
| 55 |                           |                                     |   |      |      |        |
| 56 |                           |                                     |   |      |      |        |
| 57 |                           |                                     |   |      |      |        |
| 58 |                           |                                     |   |      |      |        |
| 59 |                           |                                     |   |      |      |        |
| 60 |                           |                                     |   |      |      |        |

## Discussion

To our knowledge, this is the first systematic review and meta-analysis on the pooled prevalence of UHTN among patients with comorbidities in SSA. Our findings indicate more than three-quarters of the hypertensive people with comorbidities have uncontrolled hypertension. These findings support the literature describing the challenges in controlling blood pressure among those on treatment and living with comorbidities while highlighting the fact that recognition of patient comorbidities' should be a core aspect of the care and support offered to patients with hypertension.

The prevalence of uncontrolled hypertension varied with the type of comorbidity. The highest pooled UHTN prevalence estimate (83.7%) was observed in people with HIV (83.7%), chronic kidney disease (75.9%) and diabetes (74.5%). A systematic review and meta-analysis on the prevalence of hypertension among people with HIV showed that about 25% of people with HIV had hypertension [49]. Also important to note is that the majority of people living with HIV are in SSA. Similarly, a UK

1  
2  
3 study found reduced risk associated with diabetes in people who achieved optimal blood pressure  
4  
5 [13]. Another study conducted in Kenya found that 80% of diabetic patients from rural and semi-urban  
6  
7 areas had hypertension [50]. Since hypertension is common among people with comorbidities, there  
8  
9 is need to focus on integrated care for comorbidities and hypertension. These findings support  
10  
11 literature describing the challenge in blood pressure control among those on treatment and with  
12  
13 comorbidities.  
14  
15

16  
17 The high prevalence of UHTN in people with comorbidities is concerning and requires further  
18  
19 understanding. There are several factors affecting UHTN among patients on treatment. Non-  
20  
21 adherence to antihypertensive is an important cause of uncontrolled hypertension. A systematic  
22  
23 review conducted by Abegaz et al found 45% of patients on antihypertensive were non-adherent to  
24  
25 medications with a higher proportion (84%) being among those with uncontrolled blood pressures  
26  
27 [51]. Barriers to adherence are mainly related to limited accessibility to medications, medication side  
28  
29 effects, low perception of the risks involved with having uncontrolled blood pressure, out-of-pocket  
30  
31 costs and pill burden due to comorbidities. Provider related factors also affect the UHTN rates. A study  
32  
33 conducted by Rose et al. concluded that inadequate treatment regimens are to blame for a majority  
34  
35 of uncontrolled hypertension [8]. Provider lack of adherence to hypertension guidelines in regards to  
36  
37 dose escalation and use of multiple drug regimens are a barrier to hypertension control. Chow et al  
38  
39 revealed the use of multiple drug regimens to treat hypertension was lower in low-income countries  
40  
41 compared the higher-, upper middle- or the lower middle-income countries [10].  
42  
43  
44  
45

46  
47 The prevalence of uncontrolled hypertension has declined significantly in studies published after 2015  
48  
49 compared to those published before 2015 probably because of adherence to the changing guidelines  
50  
51 promoting tighter blood pressure control for people with comorbidities. However, despite the  
52  
53 observed decline, the prevalence of uncontrolled hypertension among people with comorbidities is  
54  
55 very high and needs further research to understand the interventions that can reduce the  
56  
57 uncontrolled hypertension rate so it can be adapted in other countries.  
58  
59  
60

1  
2  
3 Our findings have the potential to inform public health strategies to reduce the burden of uncontrolled  
4 hypertension in SSA. Addressing the barriers identified is essential in achieving optimal blood pressure  
5 levels. The World Health Organization's global target on hypertension control action plan  
6 recommends integrated care programmes for the management of hypertension and comorbidities, a  
7 recommendation supported by the results of the current study [1].  
8  
9  
10  
11  
12  
13

### 14 **Strengths and Limitations**

15  
16  
17  
18 Strengths of our systematic review and meta-analysis include the use of a published comprehensive  
19 protocol [23] to identify all available evidence without language restriction, reporting in accordance  
20 with PRISMA guidelines, search using multiple electronic databases, searching grey literature,  
21 contacting experts in the field for additional data sources to reduce study selection bias, and  
22 heterogeneity test by subgroup analyses and sensitivity analyses.  
23  
24  
25  
26  
27  
28

29  
30 This study should however, be interpreted in the context of the following limitations. First, it is  
31 important to note that control of hypertension among those on treatment was not the main outcome  
32 of most of the included studies. Secondly, the prevalence of UHTN in some comorbidities such as atrial  
33 fibrillation and chronic kidney disease were reported in single studies probably because these  
34 conditions are understudied in SSA thus limiting the generalizeability of such findings. Fourth, most of  
35 the studies included in the meta-analysis were hospital based studies (60%) that used non-random  
36 sampling procedures (80%). Therefore, population based studies are warranted. Lastly, we found  
37 substantial heterogeneity between the studies and conducted meta-regression analysis, which did not  
38 explain the heterogeneity. The lack of uniformity and variance in the blood pressure cut-off points for  
39 the different comorbidities may have resulted in this heterogeneity.  
40  
41  
42  
43  
44  
45  
46  
47  
48  
49  
50  
51

### 52 **Conclusion**

53  
54  
55 In conclusion, the prevalence of uncontrolled hypertension is high in people with comorbid conditions  
56 in sub-Saharan Africa, particularly among people with diabetes. These findings strengthen the case for  
57 action to implement integrated care in the control of hypertension more effectively in African  
58  
59  
60

1  
2  
3 populations and other low-and-middle-income countries. Such efforts include improved access to  
4  
5 blood pressure testing among people with comorbidities, strategies to improve adherence, reviewing  
6  
7 treatment guidelines and training of healthcare workers in managing people with hypertension  
8  
9 comorbidities, and monitoring blood pressure control among all patients on treatment.  
10  
11  
12

## 13 Sources of funding

14  
15 Shukri F. Mohamed, Olalekan Uthman, and Paramjit Gill are supported by the National Institute for  
16  
17 Health Research using Official Development Assistance (ODA) funding (NIHR Award ID: 16/136/87).  
18  
19 The views expressed in this publication are those of the author(s) and not necessarily those of the  
20  
21 NHS, the National Institute for Health Research or the Department of Health and Social Care.  
22  
23  
24  
25

## 26 Disclosures

27  
28 None.  
29  
30  
31

## 32 Acknowledgments

33  
34 The authors would like to thank Rishi Calleyachetty, (Assistant Professor, University of Warwick) and  
35  
36 Ivy Chumo (Research Officer, African Population and Health Research Center) for their initial support  
37  
38 in the conceptualization of this systematic review and meta-analysis. We also thank Samantha Johnson  
39  
40 (Academic Support Librarian for Medicine, Life Sciences and Psychology, University of Warwick) for  
41  
42 her guidance with the design of the initial literature search strategy.  
43  
44  
45  
46

## 47 Data availability

48 All data relevant to the study are included in the article or uploaded as supplementary information.  
49  
50  
51 No additional data available.  
52  
53

## 54 Ethics Approval

55  
56 No ethics approval was sought for this study. This study only used published material.  
57  
58  
59  
60



## Contributors

SFM conceived the study. SFM, OAU, MKM, GA, ASM, and PG designed the search strategy. SFM and ASM conducted the searches, retrieved articles, screened abstract and title, and the full text of potentially relevant articles. SFM wrote the first draft of the manuscript. All authors critically revised the manuscript and contributed to subsequent iterations.

For peer review only

## List of figures

Figure 1: Study selection flow diagram

Figure 2: Funnel plot of the prevalence of uncontrolled hypertension in people with comorbidities in sub-Saharan Africa.

Figure 3: Pooled prevalence of uncontrolled hypertension in people with comorbidities in sub-Saharan Africa, by comorbidities.

Figure 4: Funnel plot of the prevalence of uncontrolled hypertension in people with diabetes in sub-Saharan Africa

For peer review only

## References

1. World Health Organization, *Global NCD target: Reduce high blood pressure*. 2016, World Health Organization.
2. Egan, B.M., et al., *The global burden of hypertension exceeds 1.4 billion people: should a systolic blood pressure target below 130 become the universal standard?* J Hypertens, 2019. **37**(6): p. 1148-1153.
3. Mills, K.T., et al., *Global Disparities of Hypertension Prevalence and Control: A Systematic Analysis of Population-Based Studies From 90 Countries*. Circulation, 2016. **134**(6): p. 441-50.
4. Zhou, B., et al., *Worldwide trends in blood pressure from 1975 to 2015: a pooled analysis of 1479 population-based measurement studies with 19.1 million participants*. The Lancet, 2017. **389**(10064): p. 37-55.
5. World Health Organization, *Global status report on noncommunicable diseases 2014*. 2014: World Health Organization.
6. Ataklte, F., et al., *Burden of Undiagnosed Hypertension in Sub-Saharan Africa: A Systematic Review and Meta-Analysis*. Hypertension, 2015. **65**(2): p. 291-8.
7. World Health Organization, *Counterfeit medicines: an update on estimates 15 November 2006*. 2013.
8. Rose, A.J., et al., *Understanding uncontrolled hypertension: is it the patient or the provider?* The Journal of Clinical Hypertension, 2007. **9**(12): p. 937-943.
9. Cushman, W., et al., *ALLHAT Collaborative Research Group: success and predictors of blood pressure control in diverse North American settings: the Antihypertensive and Lipid-Lowering Treatment to Prevent Heart Attack Trial (ALLHAT)*. Journal of Clinical Hypertension, 2002. **4**(6): p. 393-404.
10. Chow, C.K., et al., *Prevalence, awareness, treatment, and control of hypertension in rural and urban communities in high-, middle-, and low-income countries*. Jama, 2013. **310**(9): p. 959-968.
11. Degli Esposti, E., et al., *Risk factors for uncontrolled hypertension in Italy*. Journal Of Human Hypertension, 2004. **18**: p. 207.
12. Liu, X. and P. Song, *Is the Association of Diabetes With Uncontrolled Blood Pressure Stronger in Mexican Americans and Blacks Than in Whites Among Diagnosed Hypertensive Patients?* American Journal of Hypertension, 2013. **26**(11): p. 1328-1334.
13. U. K. Prospective Diabetes Study Group, *Tight blood pressure control and risk of macrovascular and microvascular complications in type 2 diabetes: UKPDS 38*. UK Prospective Diabetes Study Group. BMJ (Clinical research ed.), 1998. **317**(7160): p. 703-713.
14. Cappuccio, F.P., et al., *A community programme to reduce salt intake and blood pressure in Ghana [ISRCTN88789643]*. BMC Public Health, 2006. **6**: p. 13.
15. Oti, S.O., et al., *Outcomes and costs of implementing a community-based intervention for hypertension in an urban slum in Kenya*. Bull World Health Organ, 2016. **94**(7): p. 501-9.
16. van de Vijver, S., et al., *Impact evaluation of a community-based intervention for prevention of cardiovascular diseases in the slums of Nairobi: the SCALE-UP study*. Glob Health Action, 2016. **9**: p. 30922.
17. Ozoemena, E.L., et al., *Effects of a health education intervention on hypertension-related knowledge, prevention and self-care practices in Nigerian retirees: a quasi-experimental study*. Archives of Public Health, 2019. **77**(1): p. 23.
18. Mohamed, S.F., et al., *Prevalence, awareness, treatment and control of hypertension and their determinants: results from a national survey in Kenya*. BMC Public Health, 2018. **18**(Suppl 3): p. 1219.

19. Monakali, S., et al., *Prevalence, awareness, control and determinants of hypertension among primary health care professional nurses in Eastern Cape, South Africa*. 2018, 2018. **10**(1).
20. Guwatudde, D., et al., *The epidemiology of hypertension in Uganda: findings from the national non-communicable diseases risk factor survey*. PloS one, 2015. **10**(9): p. e0138991.
21. Mayige, M. and G. Kagaruki, *Tanzania Steps Survey Report*. 2013.
22. Msyamboza, K.P., et al., *The burden of hypertension and its risk factors in Malawi: nationwide population-based STEPS survey*. International health, 2012. **4**(4): p. 246-252.
23. Mohamed, S.F., et al., *Uncontrolled hypertension among patients with comorbidities in sub-Saharan Africa: protocol for a systematic review and meta-analysis*. Systematic Reviews, 2020. **9**(1): p. 16.
24. Moher, D., et al., *Preferred reporting items for systematic reviews and meta-analyses: the PRISMA statement*. 2009. **339**: p. b2535.
25. Hoy, D., et al., *Assessing risk of bias in prevalence studies: modification of an existing tool and evidence of interrater agreement*. Journal of clinical epidemiology, 2012. **65**(9): p. 934-939.
26. Higgins, J.P. and S.G. Thompson, *Quantifying heterogeneity in a meta-analysis*. Statistics in medicine, 2002. **21**(11): p. 1539-58.
27. Higgins, J.P.T., et al., *Measuring inconsistency in meta-analyses*. BMJ (Clinical research ed.), 2003. **327**(7414): p. 557-560.
28. Egger, M., et al., *Bias in meta-analysis detected by a simple, graphical test*. Bmj, 1997. **315**(7109): p. 629-634.
29. Abboud, H., et al., *Demographics, socio-economic characteristics, and risk factor prevalence in patients with non-cardioembolic ischaemic stroke in low- and middle-income countries: the OPTIC registry*. International journal of stroke, 2013. **8 Suppl A100**: p. 4-13.
30. Abera, H. and M. Woldemichael, *Pattern of antihypertensive therapy among diabetic hypertensive patients in Zewditu memorial hospital, Addis Ababa*. Ethiopian medical journal, 2016. **54**(2): p. 77-82.
31. Adeniyi, O.V., et al., *Uncontrolled Hypertension and Its Determinants in Patients with Concomitant Type 2 Diabetes Mellitus (T2DM) in Rural South Africa*. PLoS One, 2016. **11**(3): p. e0150033.
32. Agaba, E.I., et al., *Chronic kidney disease screening and renoprotection in type 2 diabetes*. Annals of African medicine, 2009. **8**(1): p. 52-4.
33. Babua, C., et al., *Cardiovascular risk factors among patients with chronic kidney disease attending a tertiary hospital in Uganda*. Cardiovascular journal of Africa, 2015. **26**(4): p. 177-80.
34. Choukem, S.P., et al., *Hypertension in people with diabetes in sub-Saharan Africa: revealing the hidden face of the iceberg*. Diabetes research and clinical practice, 2007. **77**(2): p. 293-9.
35. Cohen, D.B., et al., *A survey of the management, control, and complications of diabetes mellitus in patients attending a diabetes clinic in Blantyre, Malawi, an area of high HIV prevalence*. The American journal of tropical medicine and hygiene, 2010. **83**(3): p. 575-81.
36. Hyle, E.P., et al., *Cardiovascular risk factors among ART-experienced people with HIV in South Africa*. Journal of the International AIDS Society, 2019. **22**(4): p. e25274.
37. Jardine, R.M., J. Fine, and I.W. Obel, *A survey on the treatment of atrial fibrillation in South Africa*. South African medical journal 2014. **104**(9): p. 623-7.
38. Muddu, M., et al., *Integrated Hypertension and HIV Care Cascades in an HIV Treatment Program in Eastern Uganda: A Retrospective Cohort Study*. Journal of acquired immune deficiency syndromes 2019. **81**(5): p. 552-561.
39. Mwita, J.C., et al., *Hypertension control and other cardiovascular risk factors among diabetic patients at Muhimbili National Hospital, Tanzania*. East African journal of public health, 2012. **9**(2): p. 70-3.

- 1
  - 2
  - 3
  - 4
  - 5
  - 6
  - 7
  - 8
  - 9
  - 10
  - 11
  - 12
  - 13
  - 14
  - 15
  - 16
  - 17
  - 18
  - 19
  - 20
  - 21
  - 22
  - 23
  - 24
  - 25
  - 26
  - 27
  - 28
  - 29
  - 30
  - 31
  - 32
  - 33
  - 34
  - 35
  - 36
  - 37
  - 38
  - 39
  - 40
  - 41
  - 42
  - 43
  - 44
  - 45
  - 46
  - 47
  - 48
  - 49
  - 50
  - 51
  - 52
  - 53
  - 54
  - 55
  - 56
  - 57
  - 58
  - 59
  - 60
40. Pinchevsky, Y., et al., *Treatment Gaps Found in the Management of Type 2 Diabetes at a Community Health Centre in Johannesburg, South Africa*. Journal of diabetes research, 2017. **2017**: p. 9536025.
41. Pinchevsky, Y., et al., *The implementation of guidelines in a South African population with type 2 diabetes*. Journal of Endocrinology, Metabolism and Diabetes of South Africa, 2013. **18**(3): p. 154-158.
42. Rotchford, A.P. and K.M. Rotchford, *Diabetes in rural South Africa--an assessment of care and complications*. South African medical journal, 2002. **92**(7): p. 536-41.
43. Soetedjo, N.N.M., et al., *Disease characteristics and treatment of patients with diabetes mellitus attending government health services in Indonesia, Peru, Romania and South Africa*. Tropical medicine & international health, 2018. **23**(10): p. 1118-1128.
44. Steffen, H., et al., *Hypertension prevalence, awareness, treatment and control in ambulatory treatment-naïve HIV infected patients in Lilongwe, Malawi*. Journal of Hypertension, 2017. **35**.
45. Wahab, K.W., et al., *Blood Pressure Control among Hypertensive Stroke Survivors in Nigeria*. Journal of stroke and cerebrovascular diseases, 2017. **26**(6): p. 1222-1227.
46. Yaméogo, N.V., et al., *Control of cardiovascular risk in black Africans with type 2 diabetes in Senegal*. Cardiovascular Journal of Africa, 2012. **23**(5): p. 270-272.
47. Fiseha, T., et al., *Hypertension in HIV-Infected Patients Receiving Antiretroviral Therapy in Northeast Ethiopia*. International journal of hypertension, 2019. **2019**: p. 4103604-4103604.
48. Manavalan, P., et al., *Hypertension burden and challenges across the hypertension treatment cascade among adults enrolled in HIV care in northern Tanzania*. J Clin Hypertens (Greenwich), 2020. **22**(8): p. 1518-1522.
49. Xu, Y., X. Chen, and K. Wang, *Global prevalence of hypertension among people living with HIV: a systematic review and meta-analysis*. J Am Soc Hypertens, 2017. **11**(8): p. 530-540.
50. Githinji, G.G., et al., *Prevalence of diabetes and co-morbidities in five rural and semi-urban Kenyan counties, 2010–2015*. International Journal of Diabetes in Developing Countries, 2018. **38**(2): p. 243-248.
51. Abegaz, T.M., et al., *Nonadherence to antihypertensive drugs: A systematic review and meta-analysis*. Medicine (Baltimore), 2017. **96**(4): p. e5641.

Figure 1: Study selection flow diagram

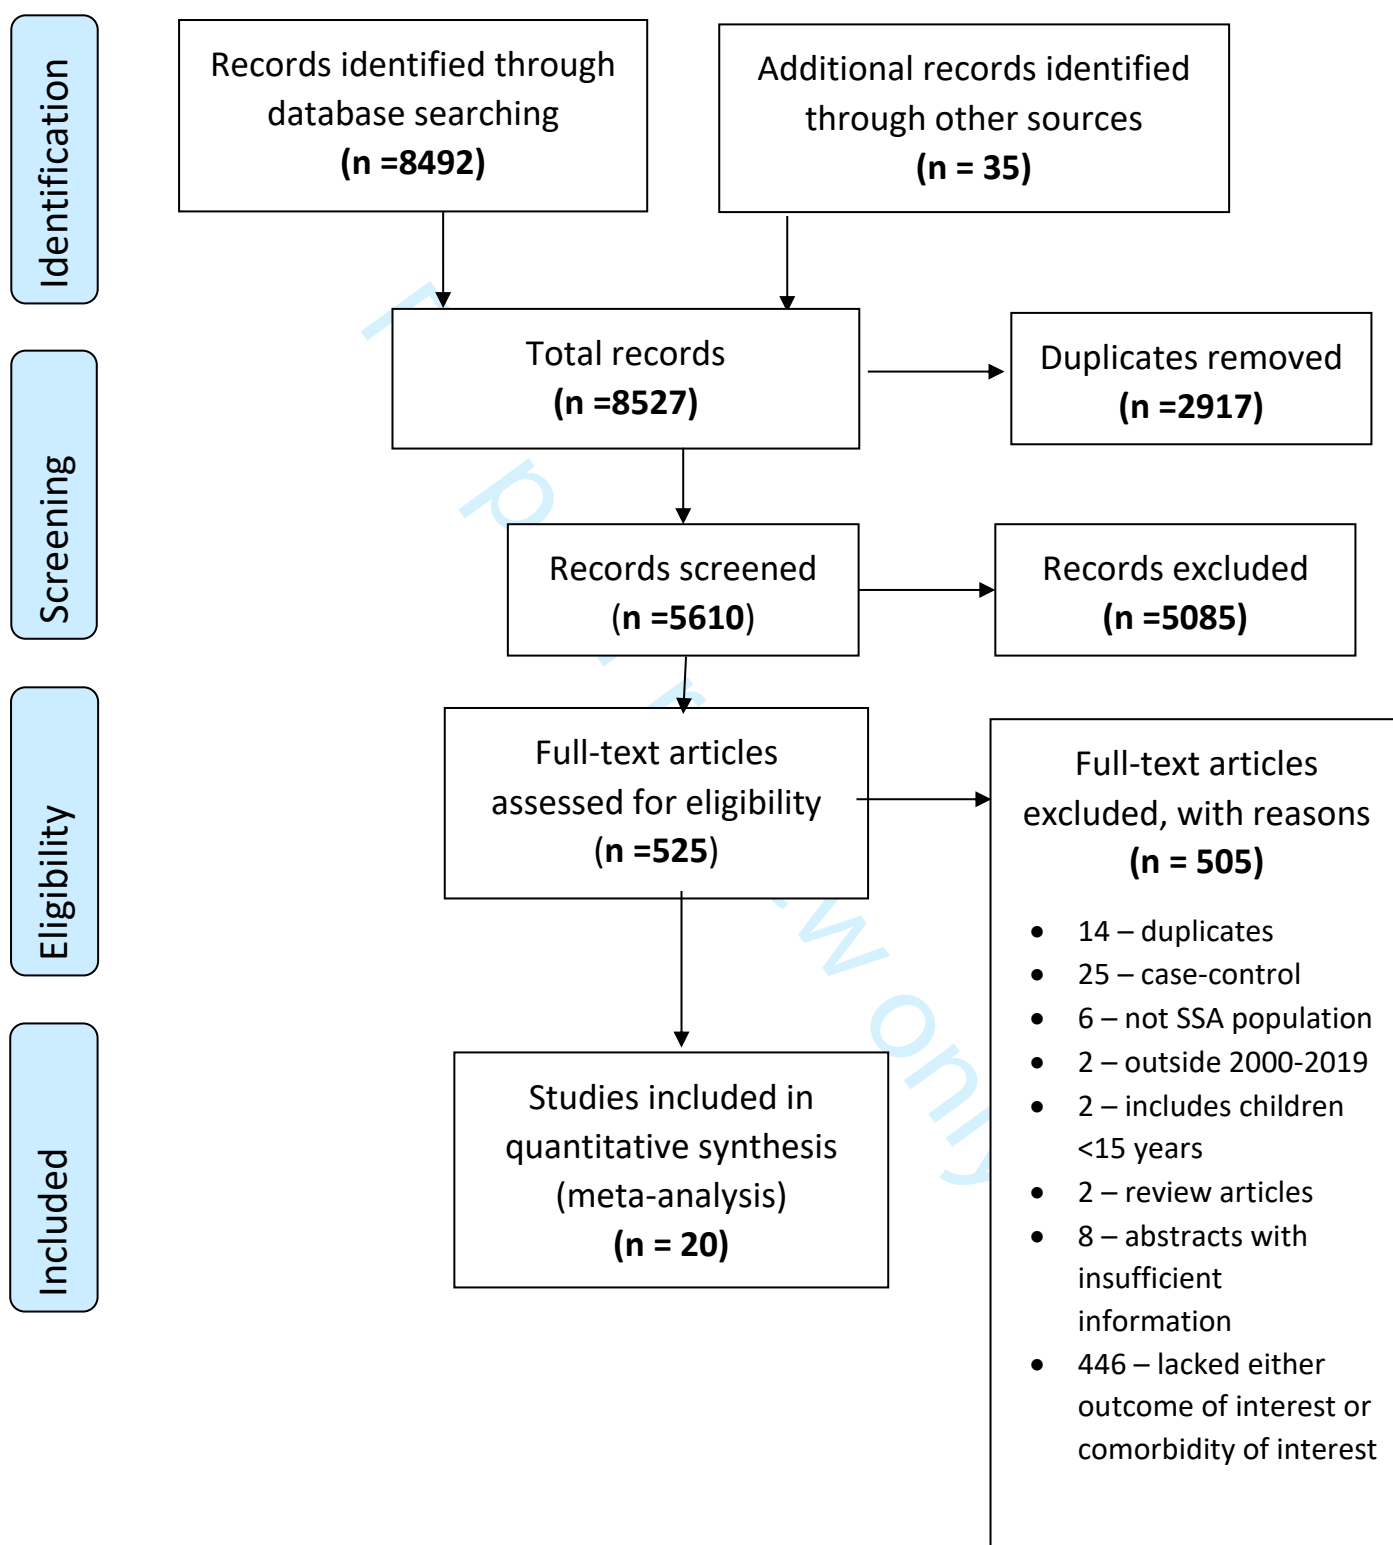

Figure 2: Funnel plot of the prevalence of uncontrolled hypertension in people with comorbidities in sub-Saharan Africa

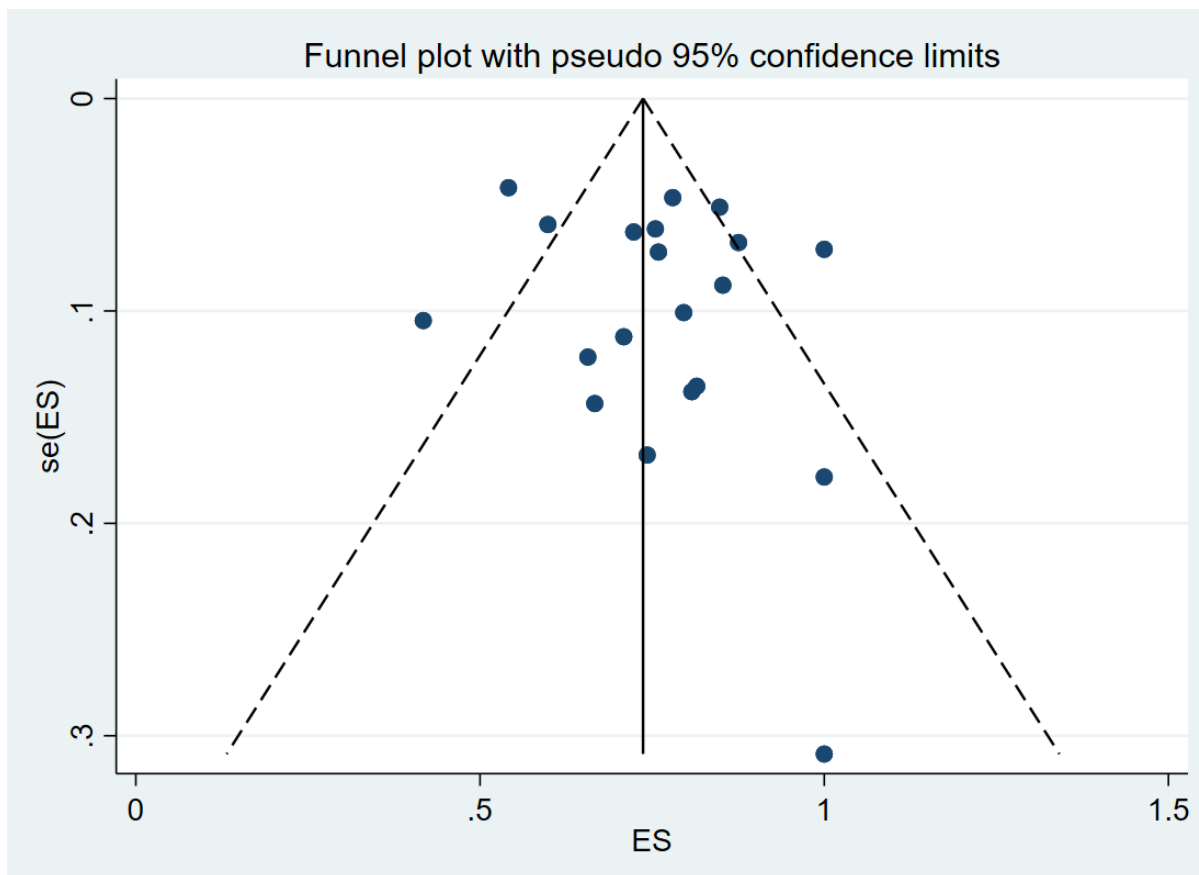

Figure 3: Pooled prevalence of uncontrolled hypertension in people with comorbidities in sub-Saharan Africa, by comorbidities

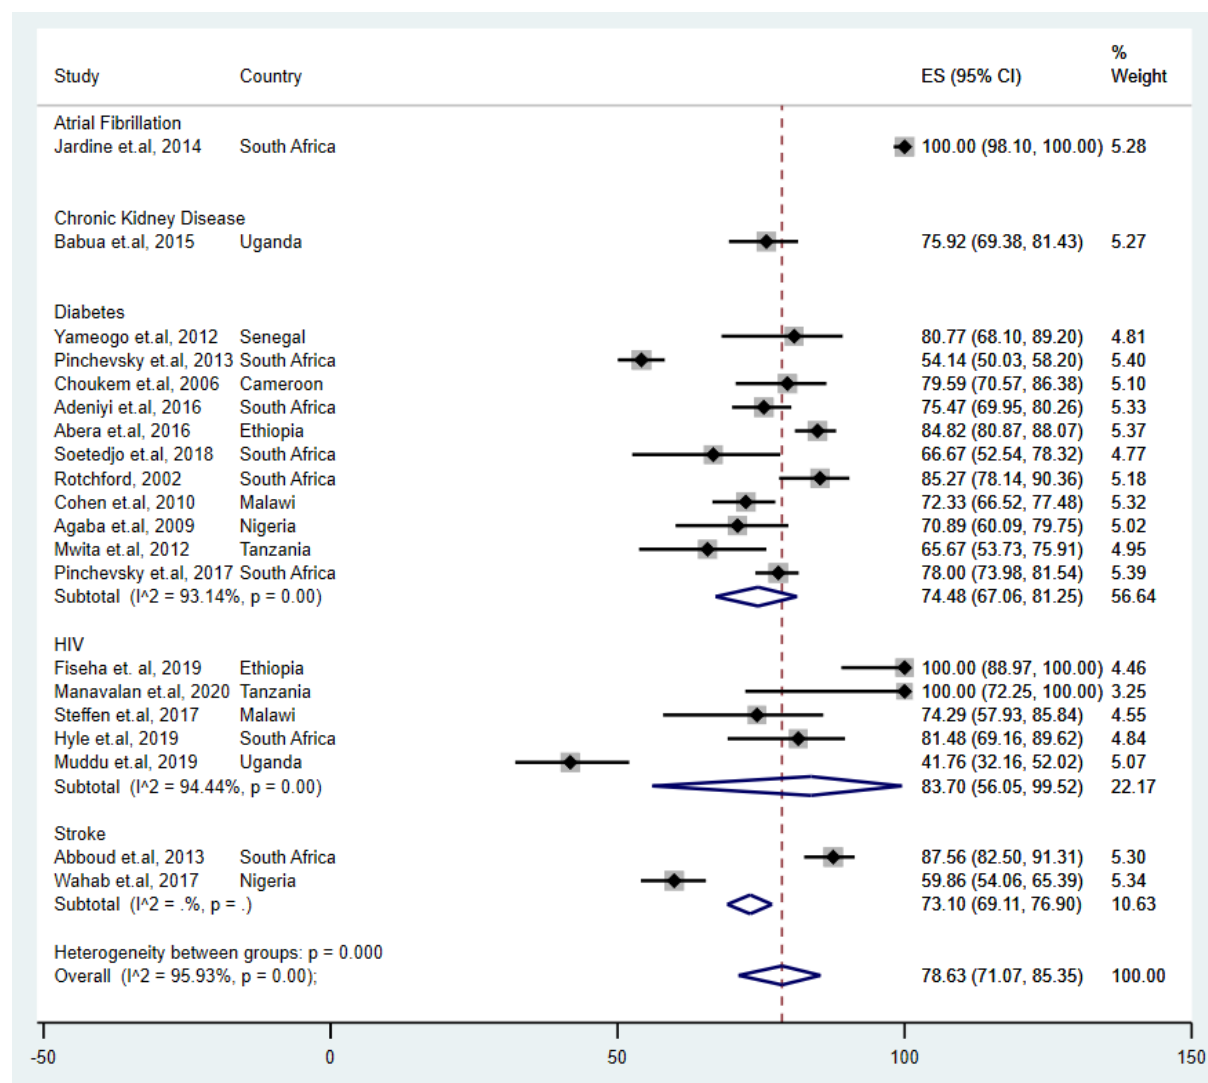



Figure 4: Funnel plot of the prevalence of uncontrolled hypertension in people with diabetes in sub-Saharan Africa

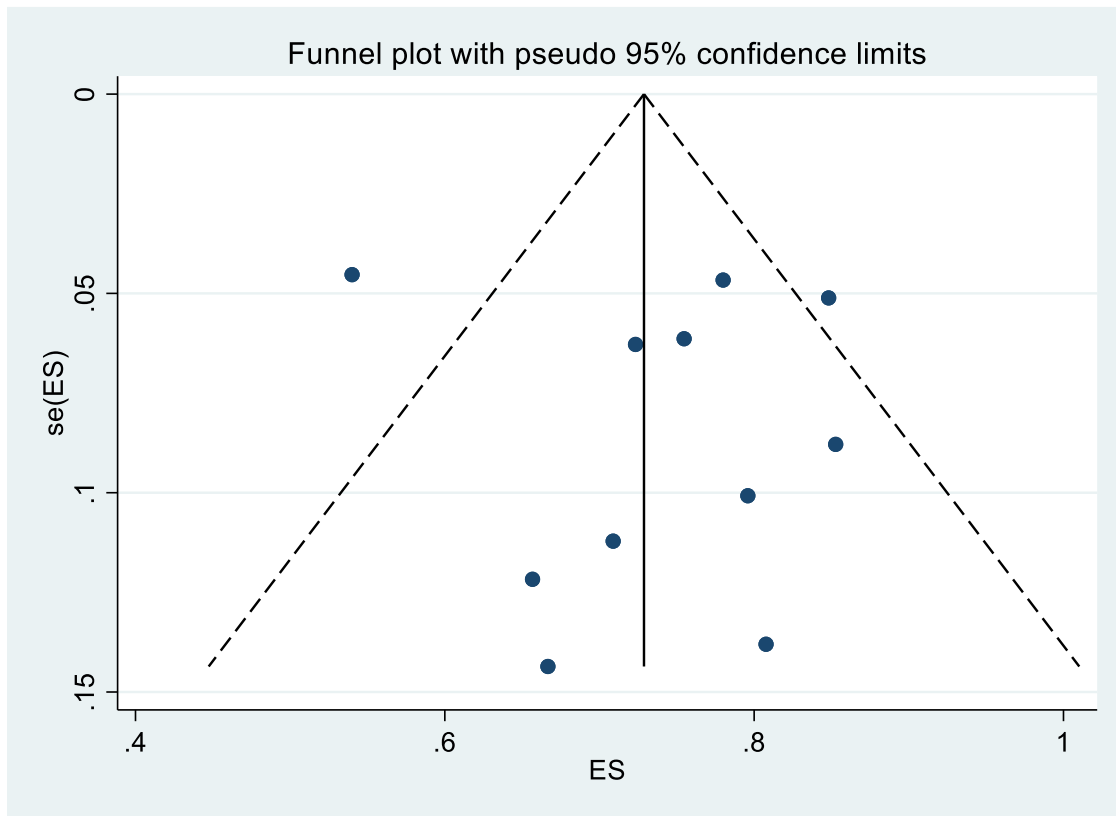

**Supplementary file S1 – Search strategy****Medline - search**

1. exp Hypertension/ or hypertension.mp.
2. exp Hypertension/ or uncontrolled hypertension.mp.
3. exp Hypertension/ or uncontrolled blood pressure.mp.
4. high blood pressure.mp. or exp Hypertension/
5. 1 or 2 or 3 or 4
6. type 2 diabetes mellitus.mp. or exp Diabetes Mellitus, Type 2/
7. type 2 diabetes.mp. or exp Diabetes Mellitus, Type 2/
8. exp Diabetes Mellitus, Type 2/ or type II diabetes.mp.
9. dyslipidemia.mp. or exp Dyslipidemias/
10. exp Dyslipidemias/ or dyslipidimia.mp.
11. exp Dyslipidemias/ or dyslipidaemia.mp.
12. Hypercholesterolemia.mp. or exp Hypercholesterolemia/
13. Hypercholesterolaemia.mp. or exp Hypercholesterolemia/
14. Hypercholesterolimia.mp. [mp=title, abstract, original title, name of substance word, subject heading word, floating sub-heading word, keyword heading word, organism supplementary concept word, protocol supplementary concept word, rare disease supplementary concept word, unique identifier, synonyms]
15. hypertriglyceridemia.mp. or exp Hypertriglyceridemia/
16. exp Hypertriglyceridemia/ or hypertriglyceridaemia.mp.
17. hypertriglyceridimia.mp.
18. hyperlipidemia.mp. or exp Hyperlipidemias/
19. exp Hyperlipidemias/ or hyperlipidaemia.mp.
20. hyperlipidimia.mp.
21. obesity.mp. or exp Obesity/
22. chronic kidney disease.mp. or exp Renal Insufficiency, Chronic/
23. stroke.mp. or exp Stroke/
24. transient ischemic attack.mp. or exp Ischemic Attack, Transient/
25. Stroke/ or exp Ischemic Attack, Transient/ or transient ischaemic attack.mp.
26. coronary heart disease.mp. or exp Coronary Disease/
27. Heart failure.mp. or exp Heart Failure/
28. peripheral vascular disease.mp. or exp Peripheral Vascular Diseases/
29. atrial fibrillation.mp. or exp Atrial Fibrillation/
30. depression.mp. or exp Depression/
31. HIV/ or HIV.mp.
32. human immunodeficiency virus.mp. or exp HIV/
33. 6 or 7 or 8 or 9 or 10 or 11 or 12 or 13 or 14 or 15 or 16 or 17 or 18 or 19 or 20 or 21 or 22 or 23 or 24 or 25 or 26 or 27 or 28 or 29 or 30 or 31 or 32
34. (Angola or Benin or Botswana or "Burkina Faso" or "Upper Volta" or Burundi or Urundi or Cameroon or Cameroons or "Cape Verde" or "Central African Republic" or Chad or Comoros or "Comoro Islands" or Comores or Mayotte or Congo or Zaire or "Cote d'Ivoire" or "Ivory Coast" or ("Democratic Republic of the Congo" or Djibouti or "French Somaliland" or Eritrea or Ethiopia or Gabon or "Gabonese Republic" or Gambia or Ghana or "Gold Coast" or Guinea or Kenya or Lesotho or Basutoland or Liberia) or (Madagascar or "Malagasy Republic" or Malawi or Nyasaland or Mali or Mauritania or Mauritius or Mozambique or Namibia or Niger or Nigeria) or (Rwanda or "Sao Tome" or Seychelles or Senegal or "Sierra Leone" or Somalia or "South Africa" or Sudan or Swaziland or Tanzania or Togo or "Togolese Republic" or Uganda or Zambia or Zimbabwe or Rhodesia)).mp. [mp=title, abstract, original title, name of substance word, subject heading word, floating sub-heading word, keyword heading word, organism supplementary concept word, protocol supplementary concept word, rare disease supplementary concept word, unique identifier, synonyms]
35. sub-Saharan africa.mp. or exp "Africa South of the Sahara"/
36. subsaharan africa.mp. or exp "Africa South of the Sahara"/
37. 34 or 35 or 36
38. 5 and 33 and 37
39. limit 38 to (humans and yr="2000 - 2021")

**Embase - search**

1. hypertension.mp. or exp hypertension/
2. exp hypertension/ or uncontrolled hypertension.mp. or exp antihypertensive agent/
3. exp antihypertensive agent/ or exp hypertension/ or uncontrolled blood pressure.mp.
4. high blood pressure.mp. or exp hypertension/
5. 1 or 2 or 3 or 4
6. type 2 diabetes mellitus.mp. or exp non insulin dependent diabetes mellitus/
7. type 2 diabetes.mp. or exp non insulin dependent diabetes mellitus/
8. type II diabetes.mp. or exp non insulin dependent diabetes mellitus/
9. dyslipidemia.mp. or exp dyslipidemia/
10. dyslipidimia.mp.
11. dyslipidaemia.mp. or exp dyslipidemia/
12. exp hypercholesterolemia/ or Hypercholesterolemia.mp.
13. Hypercholesterolaemia.mp. or exp hypercholesterolemia/
14. Hypercholesterolimia.mp.
15. hypertriglyceridemia.mp. or exp hypertriglyceridemia/
16. hypertriglyceridaemia.mp. or exp hypertriglyceridemia/
17. hypertriglyceridimia.mp. or exp hypertriglyceridemia/
18. hyperlipidemia.mp. [mp=title, abstract, original title, name of substance word, subject heading word, floating sub-heading word, keyword heading word, organism supplementary concept word, protocol supplementary concept word, rare disease supplementary concept word, unique identifier, synonyms]
19. hyperlipidaemia.mp. [mp=title, abstract, original title, name of substance word, subject heading word, floating sub-heading word, keyword heading word, organism supplementary concept word, protocol supplementary concept word, rare disease supplementary concept word, unique identifier, synonyms]
20. hyperlipidimia.mp. [mp=title, abstract, original title, name of substance word, subject heading word, floating sub-heading word, keyword heading word, organism supplementary concept word, protocol supplementary concept word, rare disease supplementary concept word, unique identifier, synonyms]
21. obesity.mp. or exp obesity/
22. chronic kidney disease.mp. or exp chronic kidney failure/
23. stroke.mp. or exp cerebrovascular accident/
24. transient ischemic attack.mp. or exp transient ischemic attack/
25. transient ischaemic attack.mp. or exp transient ischemic attack/
26. coronary heart disease.mp. or exp ischemic heart disease/
27. Heart failure.mp. or exp heart failure/
28. peripheral vascular disease.mp. or exp peripheral vascular disease/
29. atrial fibrillation.mp. or exp atrial fibrillation/
30. exp depression/ or depression.mp.
31. HIV.mp. or exp Human immunodeficiency virus/
32. 6 or 7 or 8 or 9 or 10 or 11 or 12 or 13 or 14 or 15 or 16 or 17 or 21 or 22 or 23 or 24 or 25 or 26 or 27 or 28 or 29 or 30 or 31
33. (Angola or Benin or Botswana or "Burkina Faso" or "Upper Volta" or Burundi or Urundi or Cameroon or Cameroons or "Cape Verde" or "Central African Republic" or Chad or Comoros or "Comoro Islands" or Comores or Mayotte or Congo or Zaire or "Cote d'Ivoire" or "Ivory Coast" or ("Democratic Republic of the Congo" or Djibouti or "French Somaliland" or Eritrea or Ethiopia or Gabon or "Gabonese Republic" or Gambia or Ghana or "Gold Coast" or Guinea or Kenya or Lesotho or Basutoland or Liberia) or (Madagascar or "Malagasy Republic" or Malawi or Nyasaland or Mali or Mauritania or Mauritius or Mozambique or Namibia or Niger or Nigeria) or (Rwanda or "Sao Tome" or Seychelles or Senegal or "Sierra Leone" or Somalia or "South Africa" or Sudan or Swaziland or Tanzania or Togo or "Togolese Republic" or Uganda or Zambia or Zimbabwe or Rhodesia)).mp. [mp=title, abstract, original title, name of substance word, subject heading word, floating sub-heading word, keyword heading word, organism supplementary concept word, protocol supplementary concept word, rare disease supplementary concept word, unique identifier, synonyms]
34. sub-Saharan africa.mp. or exp "Africa south of the Sahara"/
35. subsaharan africa.mp. or exp "Africa south of the Sahara"/

36. 33 or 34 or 35

37. 5 and 32 and 36

38. limit 37 to (human and yr="2000 - 2021")

### Web of Science - search

|      |                  |                                                                                                                                                                                                                                                                                                                                                                                                                                                                                                                                                                                                                                                                                                                                                                                                                                                                                                                                                                            |                                                        |
|------|------------------|----------------------------------------------------------------------------------------------------------------------------------------------------------------------------------------------------------------------------------------------------------------------------------------------------------------------------------------------------------------------------------------------------------------------------------------------------------------------------------------------------------------------------------------------------------------------------------------------------------------------------------------------------------------------------------------------------------------------------------------------------------------------------------------------------------------------------------------------------------------------------------------------------------------------------------------------------------------------------|--------------------------------------------------------|
| # 38 | <b>2,114</b>     | #37 AND #33 AND #5<br><i>Indexes=SCI-EXPANDED, SSCI, A&amp;HCI, CPCI-S, CPCI-SSH, ESCI</i><br><i>Timespan=2000-2019</i>                                                                                                                                                                                                                                                                                                                                                                                                                                                                                                                                                                                                                                                                                                                                                                                                                                                    | Edit <input type="checkbox"/> <input type="checkbox"/> |
| # 37 | <b>421,085</b>   | #36 OR #35 OR #34<br><i>Indexes=SCI-EXPANDED, SSCI, A&amp;HCI, CPCI-S, CPCI-SSH, ESCI</i><br><i>Timespan=2000-2019</i>                                                                                                                                                                                                                                                                                                                                                                                                                                                                                                                                                                                                                                                                                                                                                                                                                                                     | Edit <input type="checkbox"/> <input type="checkbox"/> |
| # 36 | <b>301</b>       | TS=(sub-Saharan Africa)<br><i>Indexes=SCI-EXPANDED, SSCI, A&amp;HCI, CPCI-S, CPCI-SSH, ESCI</i><br><i>Timespan=2000-2019</i>                                                                                                                                                                                                                                                                                                                                                                                                                                                                                                                                                                                                                                                                                                                                                                                                                                               | Edit <input type="checkbox"/> <input type="checkbox"/> |
| # 35 | <b>33,673</b>    | TS=(sub-Saharan Africa)<br><i>Indexes=SCI-EXPANDED, SSCI, A&amp;HCI, CPCI-S, CPCI-SSH, ESCI</i><br><i>Timespan=2000-2019</i>                                                                                                                                                                                                                                                                                                                                                                                                                                                                                                                                                                                                                                                                                                                                                                                                                                               | Edit <input type="checkbox"/> <input type="checkbox"/> |
| # 34 | <b>407,520</b>   | TS=(Angola OR Benin OR Botswana OR "Burkina Faso" OR "Upper Volta" OR Burundi OR Urundi OR Cameroon OR Cameroons OR "Cape Verde" OR "Central African Republic" OR Chad OR Comoros OR "Comoro Islands" OR Comores OR Mayotte OR Congo OR Zaire OR "Cote d'Ivoire" OR "Ivory Coast" OR "Democratic Republic of the Congo" OR Djibouti OR "French Somaliland" OR Eritrea OR Ethiopia OR Gabon OR "Gabonese Republic" OR Gambia OR Ghana OR "Gold Coast" OR Guinea OR Kenya OR Lesotho OR Basutoland OR Liberia OR Madagascar OR "Malagasy Republic" OR Malawi OR Nyasaland OR Mali OR Mauritania OR Mauritius OR Mozambique OR Namibia OR Niger OR Nigeria OR Rwanda OR "Sao Tome" OR Seychelles OR Senegal OR "Sierra Leone" OR Somalia OR "South Africa" OR Sudan OR Swaziland OR Tanzania OR Togo OR "Togolese Republic" OR Uganda OR Zambia OR Zimbabwe OR Rhodesia)<br><i>Indexes=SCI-EXPANDED, SSCI, A&amp;HCI, CPCI-S, CPCI-SSH, ESCI</i><br><i>Timespan=2000-2019</i> | Edit <input type="checkbox"/> <input type="checkbox"/> |
| # 33 | <b>1,764,519</b> | #32 OR #31 OR #30 OR #29 OR #28 OR #27 OR #26 OR #25 OR #24 OR #23 OR #22 OR #21 OR #20 OR #19 OR #18 OR #17 OR #16 OR #15 OR #14 OR #13 OR #12 OR #11 OR #10 OR #9 OR #8 OR #7 OR #6<br><i>Indexes=SCI-EXPANDED, SSCI, A&amp;HCI, CPCI-S, CPCI-SSH, ESCI</i><br><i>Timespan=2000-2019</i>                                                                                                                                                                                                                                                                                                                                                                                                                                                                                                                                                                                                                                                                                 | Edit <input type="checkbox"/> <input type="checkbox"/> |
| # 32 | <b>85,771</b>    | TS=(Human immunodeficiency virus)<br><i>Indexes=SCI-EXPANDED, SSCI, A&amp;HCI, CPCI-S, CPCI-SSH, ESCI</i><br><i>Timespan=2000-2019</i>                                                                                                                                                                                                                                                                                                                                                                                                                                                                                                                                                                                                                                                                                                                                                                                                                                     | Edit <input type="checkbox"/> <input type="checkbox"/> |
| # 31 | <b>272,497</b>   | TS=(HIV)<br><i>Indexes=SCI-EXPANDED, SSCI, A&amp;HCI, CPCI-S, CPCI-SSH, ESCI</i><br><i>Timespan=2000-2019</i>                                                                                                                                                                                                                                                                                                                                                                                                                                                                                                                                                                                                                                                                                                                                                                                                                                                              | Edit <input type="checkbox"/> <input type="checkbox"/> |
| # 30 | <b>369,094</b>   | TS=(depression)                                                                                                                                                                                                                                                                                                                                                                                                                                                                                                                                                                                                                                                                                                                                                                                                                                                                                                                                                            | Edit <input type="checkbox"/> <input type="checkbox"/> |

*Indexes=SCI-EXPANDED, SSCI, A&HCI, CPCI-S, CPCI-SSH, ESCI  
Timespan=2000-2019*

# 29 **80,988** TS=(atrial fibrillation) Edit    
*Indexes=SCI-EXPANDED, SSCI, A&HCI, CPCI-S, CPCI-SSH, ESCI  
Timespan=2000-2019*

# 28 **20,886** TS=(peripheral vascular disease) Edit    
*Indexes=SCI-EXPANDED, SSCI, A&HCI, CPCI-S, CPCI-SSH, ESCI  
Timespan=2000-2019*

# 27 **226,090** TS=(heart failure) Edit    
*Indexes=SCI-EXPANDED, SSCI, A&HCI, CPCI-S, CPCI-SSH, ESCI  
Timespan=2000-2019*

# 26 **144,037** TS=(coronary heart disease) Edit    
*Indexes=SCI-EXPANDED, SSCI, A&HCI, CPCI-S, CPCI-SSH, ESCI  
Timespan=2000-2019*

# 25 **1,959** TS=(transient ischaemic attack) Edit    
*Indexes=SCI-EXPANDED, SSCI, A&HCI, CPCI-S, CPCI-SSH, ESCI  
Timespan=2000-2019*

# 24 **11,095** TS=(transient ischemic attack) Edit    
*Indexes=SCI-EXPANDED, SSCI, A&HCI, CPCI-S, CPCI-SSH, ESCI  
Timespan=2000-2019*

# 23 **278,508** TS=(stroke) Edit    
*Indexes=SCI-EXPANDED, SSCI, A&HCI, CPCI-S, CPCI-SSH, ESCI  
Timespan=2000-2019*

# 22 **75,433** TS=(chronic kidney disease) Edit    
*Indexes=SCI-EXPANDED, SSCI, A&HCI, CPCI-S, CPCI-SSH, ESCI  
Timespan=2000-2019*

# 21 **280,562** TS=(obesity) Edit    
*Indexes=SCI-EXPANDED, SSCI, A&HCI, CPCI-S, CPCI-SSH, ESCI  
Timespan=2000-2019*

# 20 **5** TS=(hyperlipidimia) Edit    
*Indexes=SCI-EXPANDED, SSCI, A&HCI, CPCI-S, CPCI-SSH, ESCI  
Timespan=2000-2019*

# 19 **2,534** TS=(hyperlipidaemia) Edit    
*Indexes=SCI-EXPANDED, SSCI, A&HCI, CPCI-S, CPCI-SSH, ESCI  
Timespan=2000-2019*

# 18 **21,065** TS=(hyperlipidemia) Edit    
*Indexes=SCI-EXPANDED, SSCI, A&HCI, CPCI-S, CPCI-SSH, ESCI  
Timespan=2000-2019*

# 17 **2** TS=(hypertriglyceridimia) Edit    
*Indexes=SCI-EXPANDED, SSCI, A&HCI, CPCI-S, CPCI-SSH, ESCI  
Timespan=2000-2019*

|    |      |                |                                                                                                                                       |                                                        |
|----|------|----------------|---------------------------------------------------------------------------------------------------------------------------------------|--------------------------------------------------------|
| 1  | # 16 | <b>1,000</b>   | TS=(hypertriglyceridaemia)<br><i>Indexes=SCI-EXPANDED, SSCI, A&amp;HCI, CPCI-S, CPCI-SSH, ESCI</i><br><i>Timespan=2000-2019</i>       | Edit <input type="checkbox"/> <input type="checkbox"/> |
| 2  |      |                |                                                                                                                                       |                                                        |
| 3  |      |                |                                                                                                                                       |                                                        |
| 4  | # 15 | <b>8,591</b>   | TS=(hypertriglyceridemia)<br><i>Indexes=SCI-EXPANDED, SSCI, A&amp;HCI, CPCI-S, CPCI-SSH, ESCI</i><br><i>Timespan=2000-2019</i>        | Edit <input type="checkbox"/> <input type="checkbox"/> |
| 5  |      |                |                                                                                                                                       |                                                        |
| 6  |      |                |                                                                                                                                       |                                                        |
| 7  |      |                |                                                                                                                                       |                                                        |
| 8  |      |                |                                                                                                                                       |                                                        |
| 9  | # 14 | <b>0</b>       | TS=(hypercholesterolimia)<br><i>Indexes=SCI-EXPANDED, SSCI, A&amp;HCI, CPCI-S, CPCI-SSH, ESCI</i><br><i>Timespan=2000-2019</i>        | Edit <input type="checkbox"/> <input type="checkbox"/> |
| 10 |      |                |                                                                                                                                       |                                                        |
| 11 |      |                |                                                                                                                                       |                                                        |
| 12 |      |                |                                                                                                                                       |                                                        |
| 13 | # 13 | <b>3,188</b>   | TS=(hypercholesterolaemia)<br><i>Indexes=SCI-EXPANDED, SSCI, A&amp;HCI, CPCI-S, CPCI-SSH, ESCI</i><br><i>Timespan=2000-2019</i>       | Edit <input type="checkbox"/> <input type="checkbox"/> |
| 14 |      |                |                                                                                                                                       |                                                        |
| 15 |      |                |                                                                                                                                       |                                                        |
| 16 |      |                |                                                                                                                                       |                                                        |
| 17 |      |                |                                                                                                                                       |                                                        |
| 18 | # 12 | <b>27,232</b>  | TS=(hypercholesterolemia)<br><i>Indexes=SCI-EXPANDED, SSCI, A&amp;HCI, CPCI-S, CPCI-SSH, ESCI</i><br><i>Timespan=2000-2019</i>        | Edit <input type="checkbox"/> <input type="checkbox"/> |
| 19 |      |                |                                                                                                                                       |                                                        |
| 20 |      |                |                                                                                                                                       |                                                        |
| 21 |      |                |                                                                                                                                       |                                                        |
| 22 | # 11 | <b>4,539</b>   | TS=(dyslipidaemia)<br><i>Indexes=SCI-EXPANDED, SSCI, A&amp;HCI, CPCI-S, CPCI-SSH, ESCI</i><br><i>Timespan=2000-2019</i>               | Edit <input type="checkbox"/> <input type="checkbox"/> |
| 23 |      |                |                                                                                                                                       |                                                        |
| 24 |      |                |                                                                                                                                       |                                                        |
| 25 |      |                |                                                                                                                                       |                                                        |
| 26 |      |                |                                                                                                                                       |                                                        |
| 27 | # 10 | <b>6</b>       | TS=(dyslipidimia)<br><i>Indexes=SCI-EXPANDED, SSCI, A&amp;HCI, CPCI-S, CPCI-SSH, ESCI</i><br><i>Timespan=2000-2019</i>                | Edit <input type="checkbox"/> <input type="checkbox"/> |
| 28 |      |                |                                                                                                                                       |                                                        |
| 29 |      |                |                                                                                                                                       |                                                        |
| 30 |      |                |                                                                                                                                       |                                                        |
| 31 | # 9  | <b>25,588</b>  | TS=(dyslipidemia)<br><i>Indexes=SCI-EXPANDED, SSCI, A&amp;HCI, CPCI-S, CPCI-SSH, ESCI</i><br><i>Timespan=2000-2019</i>                | Edit <input type="checkbox"/> <input type="checkbox"/> |
| 32 |      |                |                                                                                                                                       |                                                        |
| 33 |      |                |                                                                                                                                       |                                                        |
| 34 |      |                |                                                                                                                                       |                                                        |
| 35 |      |                |                                                                                                                                       |                                                        |
| 36 | # 8  | <b>16,630</b>  | TS=(type II diabetes)<br><i>Indexes=SCI-EXPANDED, SSCI, A&amp;HCI, CPCI-S, CPCI-SSH, ESCI</i><br><i>Timespan=2000-2019</i>            | Edit <input type="checkbox"/> <input type="checkbox"/> |
| 37 |      |                |                                                                                                                                       |                                                        |
| 38 |      |                |                                                                                                                                       |                                                        |
| 39 |      |                |                                                                                                                                       |                                                        |
| 40 | # 7  | <b>173,805</b> | TS=(type 2 diabetes)<br><i>Indexes=SCI-EXPANDED, SSCI, A&amp;HCI, CPCI-S, CPCI-SSH, ESCI</i><br><i>Timespan=2000-2019</i>             | Edit <input type="checkbox"/> <input type="checkbox"/> |
| 41 |      |                |                                                                                                                                       |                                                        |
| 42 |      |                |                                                                                                                                       |                                                        |
| 43 |      |                |                                                                                                                                       |                                                        |
| 44 |      |                |                                                                                                                                       |                                                        |
| 45 | # 6  | <b>94,317</b>  | TS=(Type 2 diabetes mellitus)<br><i>Indexes=SCI-EXPANDED, SSCI, A&amp;HCI, CPCI-S, CPCI-SSH, ESCI</i><br><i>Timespan=2000-2019</i>    | Edit <input type="checkbox"/> <input type="checkbox"/> |
| 46 |      |                |                                                                                                                                       |                                                        |
| 47 |      |                |                                                                                                                                       |                                                        |
| 48 |      |                |                                                                                                                                       |                                                        |
| 49 | # 5  | <b>375,418</b> | #4 OR #3 OR #2 OR #1<br><i>Indexes=SCI-EXPANDED, SSCI, A&amp;HCI, CPCI-S, CPCI-SSH, ESCI</i><br><i>Timespan=2000-2019</i>             | Edit <input type="checkbox"/> <input type="checkbox"/> |
| 50 |      |                |                                                                                                                                       |                                                        |
| 51 |      |                |                                                                                                                                       |                                                        |
| 52 |      |                |                                                                                                                                       |                                                        |
| 53 |      |                |                                                                                                                                       |                                                        |
| 54 | # 4  | <b>113,713</b> | TS=(high blood pressure)<br><i>Indexes=SCI-EXPANDED, SSCI, A&amp;HCI, CPCI-S, CPCI-SSH, ESCI</i><br><i>Timespan=2000-2019</i>         | Edit <input type="checkbox"/> <input type="checkbox"/> |
| 55 |      |                |                                                                                                                                       |                                                        |
| 56 |      |                |                                                                                                                                       |                                                        |
| 57 |      |                |                                                                                                                                       |                                                        |
| 58 | # 3  | <b>3,503</b>   | TS=(uncontrolled blood pressure)<br><i>Indexes=SCI-EXPANDED, SSCI, A&amp;HCI, CPCI-S, CPCI-SSH, ESCI</i><br><i>Timespan=2000-2019</i> | Edit <input type="checkbox"/> <input type="checkbox"/> |
| 59 |      |                |                                                                                                                                       |                                                        |
| 60 |      |                |                                                                                                                                       |                                                        |

- # 2 **4,063** TS=(uncontrolled hypertension)  
*Indexes=SCI-EXPANDED, SSCI, A&HCI, CPCI-S, CPCI-SSH, ESCI*  
*Timespan=2000-2019*
- # 1 **307,652** **TOPIC:** (hypertension)  
*Indexes=SCI-EXPANDED, SSCI, A&HCI, CPCI-S, CPCI-SSH, ESCI*  
*Timespan=2000-2019*

Table S2: List of 11 conditions included as comorbidity

|    | Conditions                                                            |
|----|-----------------------------------------------------------------------|
| 1  | Diabetes                                                              |
| 2  | Hypercholesterolemia/dyslipidemia/hyperlipidemia/hypertriglyceridemia |
| 3  | Obesity                                                               |
| 4  | Chronic kidney disease                                                |
| 5  | Stroke and or transient Ischemic attack                               |
| 6  | Coronary heart disease                                                |
| 7  | Heart failure                                                         |
| 8  | Peripheral vascular disease                                           |
| 9  | Atrial fibrillation                                                   |
| 10 | Depression                                                            |
| 11 | HIV                                                                   |

Table S3: Assessment of Risk of Bias (RoB)

|    | External validity                                                                             | Yes/No |   | Internal validity                                                                                        | Yes/No |
|----|-----------------------------------------------------------------------------------------------|--------|---|----------------------------------------------------------------------------------------------------------|--------|
| 1  | Was the target population representative of the population in relation to relevant variables? |        | 5 | Were data collected directly from the subjects (as opposed to a proxy)?                                  |        |
| 2  | Was the sampling frame a true or close representation of the target population?               |        | 6 | Was an acceptable case definition used in the study?                                                     |        |
| 3  | Was some form of random selection used to select the sample, OR was a census undertaken?      |        | 7 | Was the study instrument that measured the parameter of interest shown to have validity and reliability? |        |
| 4  | Was the likelihood of nonresponse bias minimal in the study?                                  |        | 8 | Was the same mode of data collection used for all subjects?                                              |        |
|    |                                                                                               |        | 9 | Were the numerator(s) and denominator(s) for the parameter of interest appropriate?                      |        |
| 10 | Summary item on the overall risk of study bias                                                |        |   |                                                                                                          |        |

*Adapted from Hoy D, Brooks P, Woolf A, Blyth F, March L, Bain C, et al. Assessing risk of bias in prevalence studies: modification of an existing tool and evidence of interrater agreement. Journal of clinical epidemiology. 2012;65(9):934-9.*

Supplement Table S4: Characteristics of studies in the prevalence of uncontrolled hypertension in sub-Saharan Africa

|                                            |                  |
|--------------------------------------------|------------------|
| Year of publication (n = 20)               | 2002-2020        |
| Period of inclusion (n = 20)               | 2000-2021        |
| Mean age, years (n = 20)                   | 56.8(±0.12)      |
| % of males (n = 20)                        | 41.8(±0.27)      |
|                                            |                  |
| <b>Comorbidities</b>                       | <b>N studies</b> |
| Diabetes                                   | 11               |
| HIV                                        | 5                |
| Stroke                                     | 2                |
| Atrial fibrillation                        | 1                |
| Chronic Kidney Disease (CKD)               | 1                |
| <b>sub-Saharan African regions</b>         |                  |
| Eastern Africa                             | 6                |
| Western Africa                             | 3                |
| Central Africa                             | 1                |
| Central Africa                             | 10               |
| <b>Study design</b>                        |                  |
| Cross sectional                            | 19               |
| Not reported                               | 1                |
| <b>Sampling</b>                            |                  |
| Consecutive                                | 16               |
| Random                                     | 2                |
| Not reported                               | 2                |
| <b>Timing of data collection</b>           |                  |
| Retrospectively                            | 5                |
| Prospectively                              | 14               |
| Not reported                               | 1                |
| <b>Data sources</b>                        |                  |
| Medical records                            | 5                |
| Participants                               | 11               |
| from both medical records and participants | 3                |
| Not reported                               | 1                |
| <b>Study site</b>                          |                  |
| Hospital                                   | 12               |
| Health Center                              | 8                |
| <b>Gross National Income (GNI)</b>         |                  |
| Below sub-Saharan Africa average           | 9                |
| Above sub-Saharan Africa average           | 11               |



Supplement table 5: Meta-regression analysis for the variation of the prevalence of uncontrolled hypertension in people with comorbidity in SSA

| Variables (reference)                                           | Univariate analysis |              |                     |                    | Multivariate analysis |                     |
|-----------------------------------------------------------------|---------------------|--------------|---------------------|--------------------|-----------------------|---------------------|
|                                                                 | N studies           | P value      | Odds ratio (95% CI) | R <sup>2</sup> , % | P-value               | Odds ratio (95% CI) |
| <b>Year of publication (after 2015)</b>                         | 20                  | 0.595        | 0.96 (0.83; 1.11)   | 0.00               |                       |                     |
| <b>More females</b>                                             | 20                  | 0.172        | 0.09 (-0.04; 0.23)  | 11.35              |                       |                     |
| <b>Risk of bias (low)</b>                                       | 20                  |              |                     | 18.41              |                       |                     |
| Moderate                                                        |                     | 0.923        | 0.99 (0.76; 1.29)   |                    |                       |                     |
| High                                                            |                     | <b>0.080</b> | 1.22 (0.97; 1.53)   |                    |                       |                     |
| <b>Sample size (small studies)</b>                              | 20                  |              |                     | 0                  |                       |                     |
| Large studies                                                   |                     | 0.563        | 1.04 (0.90; 1.21)   |                    |                       |                     |
| <b>SSA regions (Eastern)</b>                                    | 20                  |              |                     | 0.00               |                       |                     |
| Western                                                         |                     | 0.636        | 0.95 (0.74; 1.21)   |                    |                       |                     |
| Central                                                         |                     | 0.747        | 1.06 (0.73; 1.53)   |                    |                       |                     |
| Southern                                                        |                     | 0.679        | 1.04 (0.87; 1.24)   |                    |                       |                     |
| <b>Comorbidities (atrial fibrillation)</b>                      | 20                  |              |                     | 3.50               |                       |                     |
| Chronic kidney disease                                          |                     | 0.222        | 0.78 (0.53; 1.16)   |                    |                       |                     |
| Diabetes                                                        |                     | 0.082        | 0.77 (0.58; 1.03)   |                    |                       |                     |
| HIV                                                             |                     | 0.097        | 0.75 (0.53; 1.06)   |                    |                       |                     |
| Stroke                                                          |                     | 0.119        | 0.76 (0.54; 1.08)   |                    |                       |                     |
| <b>Setting (Health center)</b>                                  | 20                  |              |                     | 0                  |                       |                     |
| Hospital                                                        |                     | 0.958        | 1.00 (0.86; 1.17)   |                    |                       |                     |
| <b>Sampling (Consecutive)</b>                                   | 18                  |              |                     | 0                  |                       |                     |
| Random                                                          |                     | 0.536        | 0.94 (0.75; 1.16)   |                    |                       |                     |
| <b>BP target used (recommended comorbidity target not used)</b> | 20                  |              |                     | 21.34              |                       |                     |
| Recommended BP control used                                     |                     | 0.111        | 0.90 (0.79; 1.03)   |                    |                       |                     |
| <b>GNI (Below SSA average)</b>                                  | 20                  |              |                     |                    |                       |                     |
| Above SSA average                                               |                     | 0.821        | 1.02 (0.88; 1.18)   | 0                  |                       |                     |

BP=Blood pressure

1  
2  
3  
4  
5  
6  
7  
8  
9  
10  
11  
12  
13  
14  
15  
16  
17  
18  
19  
20  
21  
22  
23  
24  
25  
26  
27  
28  
29  
30  
31  
32  
33  
34  
35  
36  
37  
38  
39  
40  
41  
42  
43  
44  
45  
46

Table S6: Meta-regression analysis for the variation of the prevalence of uncontrolled hypertension in people with diabetes in SSA

| Variables (reference)                                           | Univariate analysis |              |                           |                    | Multivariate analysis |                               |
|-----------------------------------------------------------------|---------------------|--------------|---------------------------|--------------------|-----------------------|-------------------------------|
|                                                                 | N studies           | P value      | Coefficient (95% CI)      | R <sup>2</sup> , % | P value               | Adjusted coefficient (95% CI) |
| <b>Year of publication (after 2015)</b>                         | 11                  | 0.274        | 0.0793 (-0.0748; 0.2334)  | 18.20              |                       |                               |
| <b>More females</b>                                             | 11                  | 0.205        | 0.1157 (-0.0758; 0.3072)  | 16.26              |                       |                               |
| <b>Risk of bias (low)</b>                                       | 11                  |              |                           | -15.57             |                       |                               |
| Moderate                                                        |                     | 0.858        | -0.0278 (-0.3753; 0.3198) |                    |                       |                               |
| High                                                            |                     | 0.688        | 0.0711 (-0.3228; 0.4650)  |                    |                       |                               |
| <b>Sample size (small studies)</b>                              | 11                  |              |                           | -11.04             |                       |                               |
| Large studies                                                   |                     | 0.89         | .0115 (-0.1714; 0.1943)   |                    |                       |                               |
| <b>SSA regions (Eastern)</b>                                    | 11                  |              |                           | -18.36             |                       |                               |
| Western                                                         |                     | 0.815        | -.0341 (-0.3664; 0.2982)  |                    |                       |                               |
| Central                                                         |                     | 0.952        | .0101 (-0.3755; 0.3956)   |                    |                       |                               |
| Southern                                                        |                     | 0.500        | -0.0709 (-0.3067; 0.1649) |                    |                       |                               |
| <b>Setting (Health center)</b>                                  | 11                  |              |                           | -15.43             |                       |                               |
| Hospital                                                        |                     | 0.860        | .0160 (-0.1825; 0.2144)   |                    |                       |                               |
| <b>Sampling (Consecutive)</b>                                   | 10                  |              |                           |                    |                       |                               |
| Random                                                          |                     | <b>0.001</b> | -0.2366 (-0.3477 -0.1255) | 100.00             | <b>0.043</b>          | -0.1880 (-0.3686; -0.0074 )   |
| <b>BP target used (recommended diabetes BP target not used)</b> | 11                  |              |                           | 56.66              | 0.439                 | -0.0563 (-0.2188; 0.1062)     |
| Recommended diabetes BP control target used                     |                     | <b>0.054</b> | -0.1320 (-0.2671; 0.0030) |                    |                       |                               |
| <b>GNI (Below SSA average)</b>                                  | 11                  |              |                           |                    |                       |                               |
| Above SSA average                                               |                     | 0.401        | -0.0633 (-0.2256; 0.0991) | 3.10               |                       |                               |
| <b>Mean age</b>                                                 | 11                  | 0.296        | 0.0047 (-0.0046; 0.0139)  | -0.16              |                       |                               |

BP=Blood pressure



# PRISMA 2009 Checklist

| Section/topic                      | #  | Checklist item                                                                                                                                                                                                                                                                                              | Reported on page # |
|------------------------------------|----|-------------------------------------------------------------------------------------------------------------------------------------------------------------------------------------------------------------------------------------------------------------------------------------------------------------|--------------------|
| <b>TITLE</b>                       |    |                                                                                                                                                                                                                                                                                                             |                    |
| Title                              | 1  | Identify the report as a systematic review, meta-analysis, or both.                                                                                                                                                                                                                                         | 1                  |
| <b>ABSTRACT</b>                    |    |                                                                                                                                                                                                                                                                                                             |                    |
| Structured summary                 | 2  | Provide a structured summary including, as applicable: background; objectives; data sources; study eligibility criteria, participants, and interventions; study appraisal and synthesis methods; results; limitations; conclusions and implications of key findings; systematic review registration number. | 2                  |
| <b>INTRODUCTION</b>                |    |                                                                                                                                                                                                                                                                                                             |                    |
| Rationale                          | 3  | Describe the rationale for the review in the context of what is already known.                                                                                                                                                                                                                              | 3                  |
| Objectives                         | 4  | Provide an explicit statement of questions being addressed with reference to participants, interventions, comparisons, outcomes, and study design (PICOS).                                                                                                                                                  | 4                  |
| <b>METHODS</b>                     |    |                                                                                                                                                                                                                                                                                                             |                    |
| Protocol and registration          | 5  | Indicate if a review protocol exists, if and where it can be accessed (e.g., Web address), and, if available, provide registration information including registration number.                                                                                                                               | 4                  |
| Eligibility criteria               | 6  | Specify study characteristics (e.g., PICOS, length of follow-up) and report characteristics (e.g., years considered, language, publication status) used as criteria for eligibility, giving rationale.                                                                                                      | 4-5                |
| Information sources                | 7  | Describe all information sources (e.g., databases with dates of coverage, contact with study authors to identify additional studies) in the search and date last searched.                                                                                                                                  | 4-5                |
| Search                             | 8  | Present full electronic search strategy for at least one database, including any limits used, such that it could be repeated.                                                                                                                                                                               | Supplement file 1  |
| Study selection                    | 9  | State the process for selecting studies (i.e., screening, eligibility, included in systematic review, and, if applicable, included in the meta-analysis).                                                                                                                                                   | 5                  |
| Data collection process            | 10 | Describe method of data extraction from reports (e.g., piloted forms, independently, in duplicate) and any processes for obtaining and confirming data from investigators.                                                                                                                                  | 5                  |
| Data items                         | 11 | List and define all variables for which data were sought (e.g., PICOS, funding sources) and any assumptions and simplifications made.                                                                                                                                                                       | 5                  |
| Risk of bias in individual studies | 12 | Describe methods used for assessing risk of bias of individual studies (including specification of whether this was done at the study or outcome level), and how this information is to be used in any data synthesis.                                                                                      | 5-6                |
| Summary measures                   | 13 | State the principal summary measures (e.g., risk ratio, difference in means).                                                                                                                                                                                                                               | 6                  |
| Synthesis of results               | 14 | Describe the methods of handling data and combining results of studies, if done, including measures of consistency (e.g., $I^2$ ) for each meta-analysis.                                                                                                                                                   | 6                  |

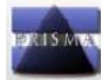

# PRISMA 2009 Checklist

Page 1 of 2

| Section/topic                 | #  | Checklist item                                                                                                                                                                                           | Reported on page # |
|-------------------------------|----|----------------------------------------------------------------------------------------------------------------------------------------------------------------------------------------------------------|--------------------|
| Risk of bias across studies   | 15 | Specify any assessment of risk of bias that may affect the cumulative evidence (e.g., publication bias, selective reporting within studies).                                                             | 7                  |
| Additional analyses           | 16 | Describe methods of additional analyses (e.g., sensitivity or subgroup analyses, meta-regression), if done, indicating which were pre-specified.                                                         | 6                  |
| <b>RESULTS</b>                |    |                                                                                                                                                                                                          |                    |
| Study selection               | 17 | Give numbers of studies screened, assessed for eligibility, and included in the review, with reasons for exclusions at each stage, ideally with a flow diagram.                                          | 7 and figure 1     |
| Study characteristics         | 18 | For each study, present characteristics for which data were extracted (e.g., study size, PICOS, follow-up period) and provide the citations.                                                             | 7-8                |
| Risk of bias within studies   | 19 | Present data on risk of bias of each study and, if available, any outcome level assessment (see item 12).                                                                                                | 10                 |
| Results of individual studies | 20 | For all outcomes considered (benefits or harms), present, for each study: (a) simple summary data for each intervention group (b) effect estimates and confidence intervals, ideally with a forest plot. | 9-12 and figure 3  |
| Synthesis of results          | 21 | Present results of each meta-analysis done, including confidence intervals and measures of consistency.                                                                                                  | 10-14              |
| Risk of bias across studies   | 22 | Present results of any assessment of risk of bias across studies (see Item 15).                                                                                                                          | 10                 |
| Additional analysis           | 23 | Give results of additional analyses, if done (e.g., sensitivity or subgroup analyses, meta-regression [see Item 16]).                                                                                    | 11-13              |
| <b>DISCUSSION</b>             |    |                                                                                                                                                                                                          |                    |
| Summary of evidence           | 24 | Summarize the main findings including the strength of evidence for each main outcome; consider their relevance to key groups (e.g., healthcare providers, users, and policy makers).                     | 14-16              |
| Limitations                   | 25 | Discuss limitations at study and outcome level (e.g., risk of bias), and at review-level (e.g., incomplete retrieval of identified research, reporting bias).                                            | 17                 |
| Conclusions                   | 26 | Provide a general interpretation of the results in the context of other evidence, and implications for future research.                                                                                  | 17                 |
| <b>FUNDING</b>                |    |                                                                                                                                                                                                          |                    |
| Funding                       | 27 | Describe sources of funding for the systematic review and other support (e.g., supply of data); role of funders for the systematic review.                                                               | 17                 |

From: Moher D, Liberati A, Tetzlaff J, Altman DG, The PRISMA Group (2009). Preferred Reporting Items for Systematic Reviews and Meta-Analyses: The PRISMA Statement. PLoS Med 6(7): e1000097. doi:10.1371/journal.pmed1000097

For more information, visit: [www.prisma-statement.org](http://www.prisma-statement.org).

# BMJ Open

## Prevalence of uncontrolled hypertension in people with comorbidities in sub-Saharan Africa: a systematic review and meta-analysis

|                                 |                                                                                                                                                                                                                                                                                                                                                                                                                                                                                                                                                                                                                                                                                                                     |
|---------------------------------|---------------------------------------------------------------------------------------------------------------------------------------------------------------------------------------------------------------------------------------------------------------------------------------------------------------------------------------------------------------------------------------------------------------------------------------------------------------------------------------------------------------------------------------------------------------------------------------------------------------------------------------------------------------------------------------------------------------------|
| Journal:                        | <i>BMJ Open</i>                                                                                                                                                                                                                                                                                                                                                                                                                                                                                                                                                                                                                                                                                                     |
| Manuscript ID                   | bmjopen-2020-045880.R2                                                                                                                                                                                                                                                                                                                                                                                                                                                                                                                                                                                                                                                                                              |
| Article Type:                   | Original research                                                                                                                                                                                                                                                                                                                                                                                                                                                                                                                                                                                                                                                                                                   |
| Date Submitted by the Author:   | 01-Nov-2021                                                                                                                                                                                                                                                                                                                                                                                                                                                                                                                                                                                                                                                                                                         |
| Complete List of Authors:       | Mohamed, Shukri; African Population and Health Research Center, Health and Systems for Health; University of Warwick, Academic Unit of Primary Care (AUPC) and the NIHR Global Health Research Unit on Improving Health in Slums, University of Warwick, Coventry, UK<br>Uthman, Olalekan; University of Warwick, Division of Health Sciences<br>Mutua, Martin; African Population and Health Research Center, Research Asiki, G; African Population and Health Research Center<br>Abba, Mustapha; University of Warwick, Academic Unit of Primary Care (AUPC) and the NIHR Global Health Research Unit on Improving Health in Slums, University of Warwick, Coventry, UK<br>Gill, Paramjit ; University of Warwick |
| <b>Primary Subject Heading</b>: | Epidemiology                                                                                                                                                                                                                                                                                                                                                                                                                                                                                                                                                                                                                                                                                                        |
| Secondary Subject Heading:      | Epidemiology, Global health, Public health                                                                                                                                                                                                                                                                                                                                                                                                                                                                                                                                                                                                                                                                          |
| Keywords:                       | PUBLIC HEALTH, EPIDEMIOLOGY, Hypertension < CARDIOLOGY                                                                                                                                                                                                                                                                                                                                                                                                                                                                                                                                                                                                                                                              |
|                                 |                                                                                                                                                                                                                                                                                                                                                                                                                                                                                                                                                                                                                                                                                                                     |

SCHOLARONE™  
Manuscripts



I, the Submitting Author has the right to grant and does grant on behalf of all authors of the Work (as defined in the below author licence), an exclusive licence and/or a non-exclusive licence for contributions from authors who are: i) UK Crown employees; ii) where BMJ has agreed a CC-BY licence shall apply, and/or iii) in accordance with the terms applicable for US Federal Government officers or employees acting as part of their official duties; on a worldwide, perpetual, irrevocable, royalty-free basis to BMJ Publishing Group Ltd ("BMJ") its licensees and where the relevant Journal is co-owned by BMJ to the co-owners of the Journal, to publish the Work in this journal and any other BMJ products and to exploit all rights, as set out in our [licence](#).

The Submitting Author accepts and understands that any supply made under these terms is made by BMJ to the Submitting Author unless you are acting as an employee on behalf of your employer or a postgraduate student of an affiliated institution which is paying any applicable article publishing charge ("APC") for Open Access articles. Where the Submitting Author wishes to make the Work available on an Open Access basis (and intends to pay the relevant APC), the terms of reuse of such Open Access shall be governed by a Creative Commons licence – details of these licences and which [Creative Commons](#) licence will apply to this Work are set out in our licence referred to above.

Other than as permitted in any relevant BMJ Author's Self Archiving Policies, I confirm this Work has not been accepted for publication elsewhere, is not being considered for publication elsewhere and does not duplicate material already published. I confirm all authors consent to publication of this Work and authorise the granting of this licence.

1  
2  
3 **Prevalence of uncontrolled hypertension in people with comorbidities in sub-Saharan**  
4  
5 **Africa: a systematic review and meta-analysis**  
6  
7

8 **Authors:** Shukri F. Mohamed, MPH<sup>1\*,2,3</sup> – [Shukri.Mohamed@warwick.ac.uk](mailto:Shukri.Mohamed@warwick.ac.uk)  
9

10  
11 Olalekan A. Uthman, PhD<sup>4</sup> – [olalekan.uthman@warwick.ac.uk](mailto:olalekan.uthman@warwick.ac.uk)  
12

13  
14 Martin K. Mutua, PhD<sup>2</sup> – [mkavao@aphrc.org](mailto:mkavao@aphrc.org)  
15

16  
17 Gershim Asiki, PhD<sup>2</sup> – [gasiki@aphrc.org](mailto:gasiki@aphrc.org)  
18

19  
20 Mustapha S. Abba, MPH<sup>1</sup> – [Mustapha.Abba@warwick.ac.uk](mailto:Mustapha.Abba@warwick.ac.uk)  
21

22  
23 Paramjit Gill, PhD<sup>1</sup> – [P.Gill.1@warwick.ac.uk](mailto:P.Gill.1@warwick.ac.uk)  
24

25  
26 \*Corresponding author: Shukri F. Mohamed – [Shukri.Mohamed@warwick.ac.uk](mailto:Shukri.Mohamed@warwick.ac.uk)  
27

28  
29 Address: Academic Unit of Primary Care (AUPC) and the NIHR Global Health Research Unit on  
30 Improving Health in Slums, University of Warwick, Coventry, UK  
31

32  
33 Email: [Shukri.Mohamed@warwick.ac.uk](mailto:Shukri.Mohamed@warwick.ac.uk); [smohamed@aphrc.org](mailto:smohamed@aphrc.org)  
34

35  
36 Phone number: +254 713 089457  
37

38  
39  
40 **Author Affiliations**  
41

42  
43 1 Academic Unit of Primary Care (AUPC) and the NIHR Global Health Research Unit on Improving  
44 Health in Slums, University of Warwick, Coventry, UK  
45

46  
47 2 Health and Systems for Health Unit, African Population and Health Research Center (APHRC),  
48 Nairobi, Kenya  
49

50  
51 3 Lown Scholars Program, Department of Global Health and Population, Harvard T.H. Chan School of  
52 Public Health, Boston, MA, USA.  
53

54  
55 4 Warwick-Centre for Applied Health Research and Delivery (WCAHRD), Warwick Medical School,  
56 University of Warwick, Coventry, UK  
57

58  
59 **Word Count: 3232**  
60

## Abstract

**Background:** The burden of uncontrolled hypertension in sub-Saharan Africa (SSA) is high and hypertension is known to co-exist with other chronic diseases such as kidney disease, diabetes among others. This is the first systematic review and meta-analysis to determine the burden of uncontrolled hypertension among patients with comorbidities in SSA.

**Methods:** A comprehensive search was conducted on MEDLINE, Excerpta Medica Database (Embase), and Web of Science to identify all relevant articles published between January 1<sup>st</sup>, 2000 and June 17<sup>th</sup>, 2021. We included studies that reported on the prevalence of uncontrolled hypertension among people in SSA who report taking antihypertensive treatment and have another chronic condition A random-effects meta-analysis was performed to obtain the pooled estimate of the prevalence of uncontrolled hypertension among patients with comorbid conditions while on treatment across studies in SSA.

**Results:** In all 20 articles were included for meta-analyses. Eleven articles were among diabetic patients, five articles were among HIV patients, two were among stroke patients while chronic kidney disease and atrial fibrillation had one article each. The pooled prevalence of uncontrolled hypertension among patients with comorbidities was 78.6% (95% CI, 71.1%-85.3%);  $I^2$  95.9%), varying from 73.1% in patients with stroke to 100.0% in patients with atrial fibrillation. Subgroup analysis showed differences in uncontrolled hypertension prevalence by various study-level characteristics

**Conclusion:** This study suggests a high burden of uncontrolled hypertension in people with comorbidities in SSA. Strategies to improve the control of hypertension among people with comorbidities are needed. PROSPERO registration number CRD42019108218.

Word count – 241

Key word – Uncontrolled hypertension, comorbidities, sub-Saharan Africa



## Strengths and limitations of this study

- A published comprehensive protocol was used to identify all available evidence without language restriction, reporting in accordance with PRISMA guidelines, search using multiple electronic databases, searching grey literature, contacting experts in the field for additional data sources to reduce study selection bias, and heterogeneity test by subgroup analyses and sensitivity analyses.
- The prevalence of uncontrolled hypertension (UHTN) in some comorbidities such as atrial fibrillation and chronic kidney disease were reported in single studies.
- Most of the studies included in the meta-analysis were hospital based studies that used non-random sampling procedures.
- There was substantial heterogeneity between the studies.

## Introduction

Hypertension is an important risk factor for cardiovascular diseases (CVDs) and a leading contributor to death globally [1]. An estimated 1.4 billion people have hypertension globally with three quarter (75%) of this population living in low-and –middle-income countries [2, 3]. Worldwide trends analysis based on a large dataset from multiple studies conducted between 1975 and 2015 in 200 countries showed no change in global mean blood pressure, but a a substantial downward trend in high income countries and a rise in low and middle income countries [4]. Levels of hypertension awareness, treatment and control improved by 2.9% in high income countries while in low-middle-income countries negligible improvement in awareness, treatment, and control were observed [3, 4]. Africa is one of the regions in the world with the highest rates of uncontrolled blood pressure [5]. In a systematic review and meta-analysis on hypertension in SSA, Ataklte et al [6], reported a (93%) high prevalence of uncontrolled hypertension (UHTN).

Hypertension often co-exists with comorbidities such as chronic kidney disease, diabetes, and hypercholesterolemia among others [7-10]. These comorbidities could explain part of the inadequacy in blood pressure control. Some studies conducted in Europe and the US found that patients with diabetes mellitus had a significantly increased risk of uncontrolled blood pressure [11, 12]. Another study conducted in the UK has shown that achieving optimal blood pressure control in patients with hypertension and type 2 diabetes produces an important decrease in the risks associated with diabetes [13].

In recent years, public health efforts to promote prevention, awareness and treatment of hypertension in SSA have intensified [14-17] but hypertension control remains low [18-22]. Despite several studies conducted on UHTN in people with comorbidities, pooled estimations of the burden are not available for comorbidities such as diabetes, dyslipidaemia, stroke, HIV, obesity, atrial fibrillation. From a clinical perspective, it is important to understand why patients on treatment are not attaining optimal blood control and whether their pre-existing comorbidities contribute to the

1  
2  
3 lack of control of blood pressure. Therefore, to inform policy, practice and the development of  
4  
5 guidelines for hypertension for integrated care among patients with comorbid conditions, it is critical  
6  
7 to understand the burden of UHTN in people with comorbidities. The purpose of this review is to  
8  
9 summarize the evidence on and estimate the prevalence of UHTN in patients with comorbidities in  
10  
11 SSA and to explore factors associated with UHTN in people with comorbidities .  
12  
13  
14  
15

## 16 Methods

### 17 Protocol and registration

18  
19  
20 The protocol for this systemic review and meta-analysis was registered on the International  
21  
22 Prospective Register of Systematic Reviews (PROSPERO CRD42019108218) and published [23]. The  
23  
24 reporting was done according to the Preferred Reporting Items for Systematic reviews and Meta-  
25  
26 Analyses (PRISMA-P) guidelines [24].  
27  
28  
29

### 30 Search Strategy

31  
32  
33 We systematically searched MEDLINE via Ovid, Excerpta Medica Database (Embase), and Web of  
34  
35 Science from January 1<sup>st</sup>, 2000 to June 17<sup>th</sup>, 2021. The search strategy included the following relevant  
36  
37 terms: *uncontrolled hypertension, hypertension, uncontrolled blood pressure, high blood pressure , a*  
38  
39 *list of comorbidities, and sub-Saharan Africa (Detailed search strategy list is attached as supplement*  
40  
41 *(Supplement file S1). Additionally, the reference lists of the included studies were reviewed to identify*  
42  
43 *other relevant studies.*  
44  
45  
46

### 47 Eligibility criteria

48  
49  
50 Studies were included if (1) they provided primary data on the prevalence of hypertension in  
51  
52 accordance with the seventh report of the Joint National Committee (JNC7) among those who reported  
53  
54 taking antihypertensive treatment and had a comorbid condition, (2) participants had been diagnosed  
55  
56 with one of the comorbidities of interest – diabetes, dyslipidemia, obesity, chronic kidney disease,  
57  
58 stroke or transient ischemic attack, coronary heart disease, heart failure, peripheral vascular disease,  
59  
60

1  
2  
3 atrial fibrillation, depression and HIV (Table S1), (3) participants were 15 and above years, (4) the study  
4 was published in any language, and (5) the study was conducted in a sub-Saharan Africa. The following  
5  
6 types of study designs were excluded: (1) case-control studies, commentaries, editorials, letters,  
7  
8 qualitative studies, and systematic reviews; (2) studies that included hypertension prevalence but did  
9  
10 not report on the prevalence of hypertension among those on antihypertensive medication; and (3)  
11  
12 studies of pregnancy-related hypertension.  
13  
14  
15

### 16 17 **Study selection**

18  
19  
20 Two researchers independently screened the titles and abstracts (SFM & ASM). Two researchers (SFM  
21  
22 & ASM) also assessed full-text reviews of the articles independently for final inclusion. The reference  
23  
24 lists of potentially relevant publications were manually searched for additional publications.  
25  
26 Disagreements were resolved by consensus. For multi-national studies, data were separated to show  
27  
28 the estimate at the country level.  
29  
30  
31

### 32 **Data items and collection process**

33  
34  
35 SFM and ASM independently screened the full texts of included studies. SFM extracted data from the  
36  
37 selected studies, and ASM checked the data for accuracy. A standardized data extraction table was  
38  
39 created (Table 1) and included the following data from all eligible articles: first author name, year of  
40  
41 publication, language, country of the study, study design, sample size, study period, study setting,  
42  
43 sampling method, the timing of data collection, data source, use of comorbidity specific hypertension  
44  
45 control cutoff, male proportion, age of participants (mean or median), type of comorbidity (diabetes,  
46  
47 stroke, HIV, chronic kidney disease, atrial fibrillation), and main outcome of interest uncontrolled  
48  
49 hypertension proportion or the data to compute it.  
50  
51  
52

### 53 **Risk of bias in individual studies**

54  
55  
56 A tool developed by Hoy et.al [25] for prevalence studies was adapted and used to assess the  
57  
58 methodological quality of included studies by evaluating the extent to which they addressed bias in 9  
59  
60

1  
2  
3 areas of internal and external validity (Table S2). Each of the nine areas was scored one if yes (high  
4 quality) and zero if no (poor quality), and a total quality score was calculated by summing the  
5 individual scores. Total scores ranged from 0 to 9, with higher scores indicating higher quality. Studies  
6 were then classified as having a low (>8), moderate (6–8), or high ( $\leq 5$ ) risk of bias. Two researchers  
7 (SFM and MKM) independently assessed each of the included publications and disagreements was  
8 resolved through discussion.  
9

### 17 **Patient and Public Involvement**

20 This research was done without patient involvement. There was no involvement of patients or  
21 members of the public in the design, or conduct, or reporting, or dissemination plans of this  
22 research.  
23  
24  
25

### 27 **Synthesis of results**

30 The statistical approach used in this meta-analysis followed the study protocol [23]. Crude numerators  
31 and denominators from the individual studies were used to recalculate the study-specific unadjusted  
32 prevalence estimates. Variances of the study-specific estimates were stabilized using the double  
33 arcsine transformation to minimise the effect of studies with very small or very large prevalence  
34 estimates on the overall estimate (16) and then a random-effects meta-analysis was performed (17)  
35 to determine the pooled estimate of the prevalence of UHTN among patients with comorbidities  
36 overall and also among people with diabetes, HIV and stroke separately while on antihypertensive  
37 treatment across the included studies in SSA. Prevalence estimates were also summarised by  
38 comorbidities, publication year, sample size, study setting, sampling, risk of bias, gender  
39 proportion, mean age and geographic regions.  
40  
41  
42  
43  
44  
45  
46  
47  
48  
49  
50  
51

52  
53 Heterogeneity was explored using Cochrane's Q and quantified by  $I^2$  statistics [26, 27]. Subgroup  
54 analyses were performed based on the following; gender proportion of participants, patient  
55 comorbidities, study design, study setting, sample size, use of recommended comorbidity specific  
56  
57  
58  
59  
60

1  
2  
3 blood pressure control cut-offs, countries, regions (Eastern, Western, Central, and Southern Africa),  
4 and by Gross National Income (GNI) were performed to identify the possible sources of  
5 heterogeneity. Sensitivity analyses were performed to assess the robustness of the findings by  
6 excluding studies with a high risk of bias.  
7  
8  
9

10  
11  
12 Funnel plots and Egger asymmetry test were used to assess publication bias, with  $P < .10$  considered  
13 to be statistically significant for publication bias [28]. Inter-rater agreements between the researchers  
14 involved in study inclusion and those involved in the identification of risk of bias were assessed using  
15  $\kappa$  Cohen's coefficient (20).  
16  
17  
18  
19  
20

21  
22 All analyses were performed using 'metaprop' routine using StataSE version 16 (StataCorp LLC).  
23  
24  
25

## 26 Results

### 27 Study selection

28  
29 From the electronic database search, 8492 records were identified. An additional 35 articles were  
30 identified through reference tracing and from other sources. After duplicate removal, 5610 remained  
31 for the title and abstract screening. After screening, we found 5085 records to be irrelevant and  
32 excluded them. The full texts of 525 articles and reports were retrieved and assessed for eligibility,  
33 resulting in the inclusion of 20 studies for the meta-analysis (figure 1). The inter-rater agreement for  
34 study selection was 0.77.  
35  
36  
37  
38  
39  
40  
41  
42  
43

### 44 Study characteristics

45  
46 Table 1 and Table S3 provide detailed information on the included studies. In total, 3,510 participants  
47 were included across 20 studies. Most of the studies were cross-sectional (19, 95%), in English (19,  
48 95%), hospital-based (12, 60%), used consecutive sampling (16, 80%), and prospectively collected data  
49 (14, 70%). The mean (SD) participant age from the 20 studies [29-48] providing this information was  
50 56.8 (0.12) years. Study sample sizes ranged from 10 to 567 participants. The proportion of male  
51 participants in the included studies was reported in all studies and it ranged from 21.4% to 60.9% [29-  
52 48]. Of the included studies, 11 [30-32, 34, 35, 39-43, 46] reported on diabetes, five [36, 38, 44, 47,  
53 48].  
54  
55  
56  
57  
58  
59  
60

1  
2  
3 48] reported on HIV, two [29, 45] reported on stroke, and one each reported on chronic kidney disease  
4  
5 [33] and atrial fibrillation [37]. None of the included studies reported on obesity, dyslipidaemia,  
6  
7 coronary heart disease, heart failure, peripheral heart disease, and depression.  
8  
9  
10  
11  
12  
13  
14  
15  
16  
17  
18  
19  
20  
21  
22  
23  
24  
25  
26  
27  
28  
29  
30  
31  
32  
33  
34  
35  
36  
37  
38  
39  
40  
41  
42  
43  
44  
45  
46  
47  
48  
49  
50  
51  
52  
53  
54  
55  
56  
57  
58  
59  
60

For peer review only

Table 1: Characteristics of the Included Studies

| Study                         | Country      | Age<br>(Mean/Median) | Study period        | Study site    | Sampling    | Male<br>% | Sample<br>size | UHTN% | Risk of<br>bias |
|-------------------------------|--------------|----------------------|---------------------|---------------|-------------|-----------|----------------|-------|-----------------|
| <b>Atrial Fibrillation</b>    |              |                      |                     |               |             |           |                |       |                 |
| Jardine et.al,2014            | South Africa | 67±13                | Feb 2010 - Mar 2011 | Health center | Consecutive | 59.9      | 198            | 100.0 | High            |
| <b>Chronic Kidney Disease</b> |              |                      |                     |               |             |           |                |       |                 |
| Babua et.al 2015              | Uganda       | 42.8                 | Jun - Feb 2013      | Hospital      | Consecutive | 51.2      | 191            | 76.0  | Low             |
| <b>Diabetes</b>               |              |                      |                     |               |             |           |                |       |                 |
| Abera et.al, 2016             | Ethiopia     | 56.3±10              | Aug - Jan 2015      | Hospital      | Consecutive | 59.9      | 382            | 85.0  | Low             |
| Adeniyi et.al, 2016           | South Africa | 61.3±11.8            | Jul to Nov 2013     | Hospital      | Consecutive | 28.3      | 265            | 75.5  | Low             |
| Agaba et.al, 2009             | Nigeria      | 51±12                | Jun - Sept 2004     | Hospital      | Consecutive | 40.2      | 79             | 70.9  | Moderate        |
| Choukem et.al 2006            | Cameroon     | 56.6±13.3            | 6 months            | Hospital      | Consecutive | 50.5      | 98             | 79.6  | Low             |
| Cohen et.al, 2010             | Malawi       | 53.2±14.0            | Mar - Jun 2007      | Hospital      | Consecutive | 39.8      | 253            | 72.7  | Low             |
| Mwita et.al, 2012             | Tanzania     | 51.6±11.2            | Feb - Sep 2010      | Health center | Consecutive | 38.0      | 67             | 66.0  | Low             |
| Pinchevsky et.al, 2017        | South Africa | 53.9±11.5            | May - Aug 2015      | Health center | Consecutive | 46.1      | 459            | 78.0  | Low             |
| Pinchevsky et.al, 2013        | South Africa | 63 ± 11.9            | July 2008-2009      | Hospital      | Random      | 44.6      | 567            | 54.2  | Low             |
| Rotchford,2002                | South Africa | 56.5±10.4            | 2 months in 1999    | Hospital      | Consecutive | 26.9      | 129            | 86.0  | Low             |
| Soetedjo et.al 2018           | South Africa | 53±9.9               | Dec 2013 - Jun 2016 | Health center | Consecutive | 35.9      | 48             | 66.7  | Low             |
| Yameogo et.al,2012            | Senegal      | 58.2±9.2             | Mar 2007 - Jul 2008 | Hospital      | NR          | 25.5      | 52             | 80.8  | High            |
| <b>HIV</b>                    |              |                      |                     |               |             |           |                |       |                 |
| Fiseha et.al, 2019            | Ethiopia     | 37±10.3              | Jan - May 2018      | Hospital      | Consecutive | 33.1      | 31             | 100.0 | Low             |
| Hyle et.al, 2019              | South Africa | 38.4±8.3             | 2015                | Health center | Consecutive | 33.0      | 54             | 83.0  | Low             |
| Manavalan et.al, 2020         | Tanzania     | NR                   | Oct 2016 - Dec 2018 | Health center | Consecutive | 21.4      | 10             | 100.0 | Low             |
| Muddu et.al, 2019             | Uganda       | 43.6±11.5            | Jan 2014 - Jan 2017 | Health center | Consecutive | 39.4      | 91             | 41.8  | Low             |
| Steffen et.al, 2017           | Malawi       | 36±9.3               | Not indicated       | Health center | NR          | 42.8      | 35             | 77.1  | Moderate        |
| <b>Stroke</b>                 |              |                      |                     |               |             |           |                |       |                 |
| Abboud et.al, 2013            | South Africa | 63.5±11.3            | Jan 2007 - Dec 2008 | Hospital      | Random      | 58.5      | 217            | 88.0  | Low             |
| Wahab et.al, 2017             | Nigeria      | 59±13.1              | Feb 2009 - Apr 2011 | Hospital      | Consecutive | 60.9      | 284            | 60.2  | Low             |

NR=Not reported



### Risk of Bias Assessment

The risk of bias was assessed in all included studies of the 20 included studies. Most studies were categorized as having some concern for bias with two (10%) [37, 46] studies being deemed to have high risk of bias. Two studies [32, 44] (11.1%) had a moderate risk of bias while 16 studies [29-31, 33-36, 38-43, 45, 47, 48] (80%) had a low risk of bias. The inter-rater agreement for the risk of bias assessment was 0.65. Additional details on the domains assessed are included in the risk of bias summary table in the supplement (Table S2).

### Prevalence of uncontrolled hypertension among patients with comorbidities

Twenty publications reported on uncontrolled hypertension among patients with comorbidities (Table 1). The majority of the studies were from South Africa (8, 40%) [29, 31, 36, 37, 40-43]. Uganda [33, 38], Nigeria [32, 45], Malawi [35, 44] Ethiopia [30, 47], and Tanzania [39, 48], had two (10%) studies each while Senegal [46] and Cameroon [34] had one study (5%) each. The reported prevalence of UHTN among people with comorbidities ranged from 41.8% (95% CI, 32.2%-52.0%) in Uganda to 100.0% (95% CI, 98.1%-100.0%) in South Africa. The pooled uncontrolled hypertension prevalence estimate in patients with comorbidities from the random-effects meta-analysis was 78.6% (95% CI, 71.1%-85.3%). Substantial heterogeneity ( $I^2 = 95.9\%$ ;  $P < .0001$ ) existed in the included studies (Table 2). Absence of publication bias is suggested by the symmetrical visual inspection of the funnel plot, confirmed by the Egger's test ( $P < .001$ ) (Figure 2).

Table 2: Meta-analysis results for the prevalence of uncontrolled hypertension in people with comorbidities in sub-Saharan Africa

|                        | Prevalence<br>(95%CI) | No of<br>studies | Number<br>of<br>Participants | $I^2$<br>(95%CI) | $p$ heterogeneity |
|------------------------|-----------------------|------------------|------------------------------|------------------|-------------------|
| Overall                | 78.6 (67.9-83.0)      | 20               | 3510                         | 96.1             | <0.0001           |
| By comorbidity         |                       |                  |                              |                  |                   |
| Atrial fibrillation    | 100.0 (98.1-100.0)    | 1                | 198                          | -                | -                 |
| Chronic kidney disease | 75.9 (69.4-81.4)      | 1                | 191                          | -                | -                 |
| Diabetes               | 74.5 (67.1-81.3)      | 11               | 2399                         | 93.1             | <0.001            |

|    |                             |                                  |    |      |      |        |
|----|-----------------------------|----------------------------------|----|------|------|--------|
| 1  |                             |                                  |    |      |      |        |
| 2  |                             |                                  |    |      |      |        |
| 3  | HIV                         | 83.7 (56.0-99.5)                 | 5  | 221  | 94.4 | <0.001 |
| 4  | Stroke                      | 73.1 (69.1-76.9)                 | 2  | 501  | -    | -      |
| 5  |                             |                                  |    |      |      |        |
| 6  | By region                   |                                  |    |      |      |        |
| 7  | Eastern                     | 80.8 (64.6-93.1)                 | 6  | 772  | 94.7 | <0.001 |
| 8  | Western                     | 69.8 (57.0-81.2)                 | 3  | 415  | -    | -      |
| 9  | Central                     | 79.6 (70.6-86.4)                 | 1  | 98   | -    | -      |
| 10 | Southern                    | 79.8 (68.1-89.4)                 | 10 | 2225 | 97.3 | <0.001 |
| 11 |                             |                                  |    |      |      |        |
| 12 | By risk of bias             |                                  |    |      |      |        |
| 13 | Low                         | 76.4 (69.3-82.8)                 | 16 | 3146 | 94.4 | <0.001 |
| 14 | Moderate                    | 72.0 (63.3-80.0)                 | 2  | 114  | -    | -      |
| 15 | High                        | 99.0 (97.1-100.0)                | 2  | 250  | -    | -      |
| 16 |                             |                                  |    |      |      |        |
| 17 | By study size               |                                  |    |      |      |        |
| 18 | Small studies               | 77.6 (66.0-87.4)                 | 10 | 565  | 88.6 | <0.001 |
| 19 | Large studies               | 79.5 (69.0-83.0)                 | 10 | 2945 | 97.7 | <0.001 |
| 20 |                             |                                  |    |      |      |        |
| 21 | By period of publication    |                                  |    |      |      |        |
| 22 | Before 2015                 | 79.4 (66.5-89.9)                 | 10 | 1851 | 97.3 | <0.001 |
| 23 | After 2015                  | 77.3 (68.0-85.4)                 | 10 | 1659 | 93.1 | <0.001 |
| 24 |                             |                                  |    |      |      |        |
| 25 | By gender proportion        |                                  |    |      |      |        |
| 26 | More females                | 75.4 (67.6-82.5)                 | 14 | 2140 | 92.5 | <0.001 |
| 27 | More males                  | 84.1 (69.5-94.7)                 | 6  | 1370 | 97.6 | <0.001 |
| 28 |                             |                                  |    |      |      |        |
| 29 | By sampling                 |                                  |    |      |      |        |
| 30 | Consecutive                 | 76.1 (67.6-83.7)                 | 18 | 2639 | 95.6 | <0.001 |
| 31 | Random                      | 64.5 (61.1-67.9)                 | 2  | 784  | -    | -      |
| 32 |                             |                                  |    |      |      |        |
| 33 | By setting                  |                                  |    |      |      |        |
| 34 | Hospital                    | 78.4 (69.8-86.0)                 | 12 | 2548 | 95.3 | <0.001 |
| 35 | Health center               | 79.4(60.7-93.4)                  | 8  | 962  | 96.8 | <0.001 |
| 36 |                             |                                  |    |      |      |        |
| 37 | By comorbidity HTN target   |                                  |    |      |      |        |
| 38 | Comorbidity target used     | 70.7 (61.3-79.2)                 | 13 | 1776 | 93.3 | <0.001 |
| 39 | Comorbidity target not used | 83.0 (72.4-91.4)                 | 7  | 1734 | 96.3 | <0.001 |
| 40 |                             |                                  |    |      |      |        |
| 41 | By Gross National Income    |                                  |    |      |      |        |
| 42 | Below SSA Average           | 78.6 (68.2-87.4)                 | 9  | 1179 | 91.9 | <0.001 |
| 43 | Above SSA average           | 78.3 (66.1-88.4)                 | 11 | 2331 | 97.3 | <0.001 |
| 44 |                             |                                  |    |      |      |        |
| 45 | SSA=sub-Saharan Africa      | <b>P<sup>egger</sup> = 0.381</b> |    |      |      |        |

Subgroup analysis revealed differences in uncontrolled hypertension prevalence by comorbidity (Figure 3). Adults with atrial fibrillation reported the highest uncontrolled hypertension estimate (100.0% [95% CI, 98.1%- 100.0%]), followed by adults with HIV (83.7% [95% CI, 56.0%-99.5%]). The lowest pooled uncontrolled hypertension prevalence estimate was found in adults with stroke (73.1% [95% CI, 69.1%-76.9%]). Pooled UHTN prevalence differed by geographic regions; studies conducted in the Eastern, Southern and Central region reported higher prevalence's (80.8% [95% CI, 64.6%-

93.1%]), (79.8% [95% CI, 68.2%-89.3%]) and (79.6% [95% CI, 70.6%-86.4%]) respectively than studies conducted in the Western region (69.8% [95% CI, 57.0%-81.2%]). Prevalence varied by sample size; large studies reported a slightly higher prevalence (79.5% [95% CI, 69.1%-88.2%]) compared to small studies (77.6% [95% CI, 66.0%-87.4%]) (table 2). Studies that used the recommended hypertension control value for each comorbidity reported lower pooled prevalence of uncontrolled hypertension (75.8 [95% CI, 66.4-84.1]) compared to those that did not use the recommended comorbidity specific blood pressure control value (83.0 [95% CI, 72.4-91.4]).

In the univariable analysis, heterogeneity was explained by being female (11.3%), risk of bias (18.4%), by regions (15.8%), comorbidities (3.5%), and using target blood pressure (21.3%) (Table S4). However only comorbidities and risk of bias were significant at 10% and these were added to the multivariable meta-regression analysis. The results from the multivariable meta-regression were not statistically significant. Sensitivity analysis conducted by excluding studies that had high risk of bias from the analysis did not show any influence on the robustness of the findings in the pooled analyses.

Sensitivity analysis done by excluding studies with high risk of bias from the analysis did not show any influence on the robustness of the findings in the pooled analysis.

### **Prevalence of uncontrolled hypertension among patients with diabetes**

The prevalence of uncontrolled hypertension prevalence estimate among patients with diabetes was reported in 11 studies [30-32, 34, 35, 39-43, 46], with a total of 2399 participants. Uncontrolled hypertension prevalence in this group ranged from 54% (95% CI, 50%- 58%) to 85% (95% CI, 78%-90%), with a pooled estimate of 74.5% (95% CI, 67.1%-81.3%) (Table 2). Substantial heterogeneity ( $I^2 = 93.1%$ ;  $P < .001$ ) was observed in the included studies (Figure 2). Publication bias was not evident from the visual inspection of the funnel plot (Figure 4).

Subgroup analysis revealed differences in uncontrolled hypertension prevalence among people with diabetes (Table 3). There were differences noted by sample size; large studies reported a higher

prevalence (75.5% [95% CI, 67.1%-81.3%]) compared to small studies (73.3% [95% CI, 68.2%-79.3%]) (table 2). Pooled UHTN prevalence differed by geographic regions; studies conducted in the Eastern region reported the highest pooled prevalence (82.5% [95% CI, 80.4%-87.1%]) while studies conducted in the Southern region reported the lowest pooled prevalence (72.5% [95% CI, 62.0%-81.8%]). Gender differences were also noted; studies with more male participants had higher pooled prevalence (72.5% [95% CI, 64.4%-79.9%]) compared to studies with more female participants. Studies conducted after 2015 had higher pooled prevalence of UHTN among people with diabetes compared to studies conducted before 2015. Studies that used the recommended diabetes hypertension cutoff (BP<130/85 mmHg) to define blood pressure control reported lower UHTN prevalences compared to those that did not use the recommended hypertension control value. Studies that had below the average SSA GNI reported a higher prevalence of UHTN (77.3 [95% CI, 69.7-84.2]) compared to studies with above the average SSA GNI (72.3 [95% CI, 61.0-82.3]).

In the univariable analysis, the use of the recommended hypertension control value for diabetes explained the most of the heterogeneity (56.7%) observed while sampling explained 100% of the heterogeneity (Table S5). In the final multivariable model, the sampling method used was associated with uncontrolled hypertension and explained most of the heterogeneity.

Table 3: Meta-analysis results for the prevalence of uncontrolled hypertension in people with diabetes in sub-Saharan Africa

|                 | Prevalence<br>(95%CI) | No of<br>studies | Number of<br>Participants | I <sup>2</sup><br>(95%CI) | p <sub>heterogeneity</sub> |
|-----------------|-----------------------|------------------|---------------------------|---------------------------|----------------------------|
| Overall         | 74.5 (67.1-81.3)      | 11               | 2399                      | 93.1                      | <0.001                     |
| By region       |                       |                  |                           |                           |                            |
| Eastern         | 82.5 (78.8-85.9)      | 2                | 449                       | -                         | -                          |
| Western         | 75.0 (67.1-82.1)      | 2                | 131                       | -                         | -                          |
| Central         | 79.6 (70.6-86.4)      | 1                | 98                        | -                         | -                          |
| Southern        | 72.5 (62.0-81.8)      | 6                | 1721                      | 94.9                      | <0.001                     |
| By risk of bias |                       |                  |                           |                           |                            |
| Low             | 74.2 (65.8-81.9)      | 9                | 2268                      | 94.4                      | <0.001                     |
| Moderate        | 70.9 (60.1-78.8)      | 1                | 79                        | -                         | -                          |
| High            | 80.8 (68.1-89.2)      | 1                | 52                        | -                         | -                          |
| By study size   |                       |                  |                           |                           |                            |
| Small studies   | 73.25 (66.8-79.3)     | 5                | 344                       | 40.6                      | 0.15                       |

|    |                           |                                     |   |      |      |        |
|----|---------------------------|-------------------------------------|---|------|------|--------|
| 1  |                           |                                     |   |      |      |        |
| 2  |                           |                                     |   |      |      |        |
| 3  | Large studies             | 75.5 (64.82-84.8)                   | 6 | 2055 | 96.4 | <0.001 |
| 4  | By period of publication  |                                     |   |      |      |        |
| 5  | Before 2015               | 72.9 (62.4-82.3)                    | 4 | 1245 | 92.4 | <0.001 |
| 6  | After 2015                | 78.0 (71.9-83.6)                    | 7 | 1154 | 79.6 | <0.001 |
| 7  | By gender proportion      |                                     |   |      |      |        |
| 8  | More females              | 72.5 (64.4-79.9)                    | 9 | 1919 | 92.2 | <0.001 |
| 9  | More males                | 83.9 (80.4-87.1)                    | 2 | 480  | -    | -      |
| 10 | By sampling               |                                     |   |      |      |        |
| 11 | Consecutive               | 76.7 (72.3-80.9)                    | 9 | 1780 | 75.2 | <0.001 |
| 12 | Random                    | 54.1 (50.0-58.2)                    | 1 | 567  | -    | -      |
| 13 | By setting                |                                     |   |      |      |        |
| 14 | Hospital                  | 75.7 (66.0-84.3)                    | 8 | 1825 | 94.9 | <0.001 |
| 15 | Health center             | 71.6 (61.5-80.8)                    | 3 | 574  | -    | -      |
| 16 | By comorbidity HTN target |                                     |   |      |      |        |
| 17 | Comorbidity target used   | 70.1 (57.4-81.5)                    | 5 | 863  | 90.1 | <0.001 |
| 18 | Comorbidity target not    |                                     |   |      |      |        |
| 19 | used                      | 78.2 (73.1-82.9)                    | 6 | 1536 | 79.3 | <0.001 |
| 20 | By Gross National Income  |                                     |   |      |      |        |
| 21 | Below SSA Average         | 77.3 (69.7-84.2)                    | 5 | 852  | 81.1 | <0.001 |
| 22 | Above SSA average         | 72.3 (61.0-82.3)                    | 6 | 1547 | 94.9 | <0.001 |
| 23 | SSA=sub-Saharan Africa    | <b>P<sub>egger</sub> &lt; 0.001</b> |   |      |      |        |
| 24 |                           |                                     |   |      |      |        |
| 25 |                           |                                     |   |      |      |        |
| 26 |                           |                                     |   |      |      |        |
| 27 |                           |                                     |   |      |      |        |
| 28 |                           |                                     |   |      |      |        |
| 29 |                           |                                     |   |      |      |        |
| 30 |                           |                                     |   |      |      |        |
| 31 |                           |                                     |   |      |      |        |
| 32 |                           |                                     |   |      |      |        |
| 33 |                           |                                     |   |      |      |        |
| 34 |                           |                                     |   |      |      |        |
| 35 |                           |                                     |   |      |      |        |
| 36 |                           |                                     |   |      |      |        |
| 37 |                           |                                     |   |      |      |        |
| 38 |                           |                                     |   |      |      |        |
| 39 |                           |                                     |   |      |      |        |
| 40 |                           |                                     |   |      |      |        |
| 41 |                           |                                     |   |      |      |        |
| 42 |                           |                                     |   |      |      |        |
| 43 |                           |                                     |   |      |      |        |
| 44 |                           |                                     |   |      |      |        |
| 45 |                           |                                     |   |      |      |        |
| 46 |                           |                                     |   |      |      |        |
| 47 |                           |                                     |   |      |      |        |
| 48 |                           |                                     |   |      |      |        |
| 49 |                           |                                     |   |      |      |        |
| 50 |                           |                                     |   |      |      |        |
| 51 |                           |                                     |   |      |      |        |
| 52 |                           |                                     |   |      |      |        |
| 53 |                           |                                     |   |      |      |        |
| 54 |                           |                                     |   |      |      |        |
| 55 |                           |                                     |   |      |      |        |
| 56 |                           |                                     |   |      |      |        |
| 57 |                           |                                     |   |      |      |        |
| 58 |                           |                                     |   |      |      |        |
| 59 |                           |                                     |   |      |      |        |
| 60 |                           |                                     |   |      |      |        |

## Discussion

To our knowledge, this is the first systematic review and meta-analysis on the pooled prevalence of UHTN among patients with comorbidities in SSA. Our findings indicate more than three-quarters of the hypertensive people with comorbidities have uncontrolled hypertension. These findings support the literature describing the challenges in controlling blood pressure among those on treatment and living with comorbidities while highlighting the fact that recognition of patient comorbidities' should be a core aspect of the care and support offered to patients with hypertension.

The prevalence of uncontrolled hypertension varied with the type of comorbidity. The highest pooled UHTN prevalence estimate (83.7%) was observed in people with HIV (83.7%), chronic kidney disease (75.9%) and diabetes (74.5%). A systematic review and meta-analysis on the prevalence of hypertension among people with HIV showed that about 25% of people with HIV had hypertension [49]. Also important to note is that the majority of people living with HIV are in SSA. Similarly, a UK

1  
2  
3 study found reduced risk associated with diabetes in people who achieved optimal blood pressure  
4  
5 [13]. Another study conducted in Kenya found that 80% of diabetic patients from rural and semi-urban  
6  
7 areas had hypertension [50]. Since hypertension is common among people with comorbidities, there  
8  
9 is need to focus on integrated care for comorbidities and hypertension. These findings support  
10  
11 literature describing the challenge in blood pressure control among those on treatment and with  
12  
13 comorbidities.  
14  
15

16  
17 The high prevalence of UHTN in people with comorbidities is concerning and requires further  
18  
19 understanding. There are several factors affecting UHTN among patients on treatment. Non-  
20  
21 adherence to antihypertensive is an important cause of uncontrolled hypertension. A systematic  
22  
23 review conducted by Abegaz et al found 45% of patients on antihypertensive were non-adherent to  
24  
25 medications with a higher proportion (84%) being among those with uncontrolled blood pressures  
26  
27 [51]. Barriers to adherence are mainly related to limited accessibility to medications, medication side  
28  
29 effects, low perception of the risks involved with having uncontrolled blood pressure, out-of-pocket  
30  
31 costs and pill burden due to comorbidities. Provider related factors also affect the UHTN rates. A study  
32  
33 conducted by Rose et al. concluded that inadequate treatment regimens are to blame for a majority  
34  
35 of uncontrolled hypertension [8]. Provider lack of adherence to hypertension guidelines in regards to  
36  
37 dose escalation and use of multiple drug regimens are a barrier to hypertension control. Chow et al  
38  
39 revealed the use of multiple drug regimens to treat hypertension was lower in low-income countries  
40  
41 compared the higher-, upper middle- or the lower middle-income countries [10].  
42  
43  
44  
45

46  
47 The prevalence of uncontrolled hypertension has declined significantly in studies published after 2015  
48  
49 compared to those published before 2015 probably because of adherence to the changing guidelines  
50  
51 promoting tighter blood pressure control for people with comorbidities. However, despite the  
52  
53 observed decline, the prevalence of uncontrolled hypertension among people with comorbidities is  
54  
55 very high and needs further research to understand the interventions that can reduce the  
56  
57 uncontrolled hypertension rate so it can be adapted in other countries.  
58  
59  
60

1  
2  
3 Our findings have the potential to inform public health strategies to reduce the burden of uncontrolled  
4 hypertension in SSA. Addressing the barriers identified is essential in achieving optimal blood pressure  
5 levels. The World Health Organization's global target on hypertension control action plan  
6 recommends integrated care programmes for the management of hypertension and comorbidities, a  
7 recommendation supported by the results of the current study [1].  
8  
9  
10  
11  
12  
13

### 14 **Strengths and Limitations**

15  
16  
17 Strengths of our systematic review and meta-analysis include the use of a published comprehensive  
18 protocol [23] to identify all available evidence without language restriction, reporting in accordance  
19 with PRISMA guidelines, search using multiple electronic databases, searching grey literature,  
20 contacting experts in the field for additional data sources to reduce study selection bias, and  
21 heterogeneity test by subgroup analyses and sensitivity analyses.  
22  
23  
24  
25  
26  
27  
28  
29

30 This study should however, be interpreted in the context of the following limitations. First, it is  
31 important to note that control of hypertension among those on treatment was not the main outcome  
32 of most of the included studies. Secondly, the prevalence of UHTN in some comorbidities such as atrial  
33 fibrillation and chronic kidney disease were reported in single studies probably because these  
34 conditions are understudied in SSA thus limiting the generalizeability of such findings. Fourth, most of  
35 the studies included in the meta-analysis were hospital based studies (60%) that used non-random  
36 sampling procedures (80%). Therefore, population based studies are warranted. Lastly, we found  
37 substantial heterogeneity between the studies and conducted meta-regression analysis, which did not  
38 explain the heterogeneity. The lack of uniformity and variance in the blood pressure cut-off points for  
39 the different comorbidities may have resulted in this heterogeneity.  
40  
41  
42  
43  
44  
45  
46  
47  
48  
49  
50  
51  
52  
53

### 54 **Conclusion**

55 In conclusion, the prevalence of uncontrolled hypertension is high in people with comorbid conditions  
56 in sub-Saharan Africa, particularly among people with diabetes. These findings strengthen the case for  
57 action to implement integrated care in the control of hypertension more effectively in African  
58  
59  
60

1  
2  
3 populations and other low-and-middle-income countries. Such efforts include improved access to  
4  
5 blood pressure testing among people with comorbidities, strategies to improve adherence, reviewing  
6  
7 treatment guidelines and training of healthcare workers in managing people with hypertension  
8  
9 comorbidities, and monitoring blood pressure control among all patients on treatment.  
10  
11  
12

## 13 Sources of funding

14  
15 Shukri F. Mohamed, Olalekan Uthman, and Paramjit Gill are supported by the National Institute for  
16  
17 Health Research using Official Development Assistance (ODA) funding (NIHR Award ID: 16/136/87).  
18  
19 The views expressed in this publication are those of the author(s) and not necessarily those of the  
20  
21 NHS, the National Institute for Health Research or the Department of Health and Social Care.  
22  
23  
24  
25

## 26 Disclosures

27  
28 None.  
29  
30  
31

## 32 Acknowledgments

33  
34 The authors would like to thank Rishi Calleyachetty, (Assistant Professor, University of Warwick) and  
35  
36 Ivy Chumo (Research Officer, African Population and Health Research Center) for their initial support  
37  
38 in the conceptualization of this systematic review and meta-analysis. We also thank Samantha Johnson  
39  
40 (Academic Support Librarian for Medicine, Life Sciences and Psychology, University of Warwick) for  
41  
42 her guidance with the design of the initial literature search strategy.  
43  
44  
45  
46

## 47 Data availability

48 All data relevant to the study are included in the article or uploaded as supplementary information.  
49  
50  
51 No additional data available.  
52  
53

## 54 Ethics Approval

55  
56 No ethics approval was sought for this study. This study only used published material.  
57  
58  
59  
60



## Contributors

SFM conceived the study. SFM, OAU, MKM, GA, ASM, and PG designed the search strategy. SFM and ASM conducted the searches, retrieved articles, screened abstract and title, and the full text of potentially relevant articles. SFM wrote the first draft of the manuscript. All authors critically revised the manuscript and contributed to subsequent iterations.

For peer review only

## List of figures

Figure 1: Study selection flow diagram

Figure 2: Funnel plot of the prevalence of uncontrolled hypertension in people with comorbidities in sub-Saharan Africa.

Figure 3: Pooled prevalence of uncontrolled hypertension in people with comorbidities in sub-Saharan Africa, by comorbidities.

Figure 4: Funnel plot of the prevalence of uncontrolled hypertension in people with diabetes in sub-Saharan Africa

For peer review only

## References

1. World Health Organization, *Global NCD target: Reduce high blood pressure*. 2016, World Health Organization.
2. Egan, B.M., et al., *The global burden of hypertension exceeds 1.4 billion people: should a systolic blood pressure target below 130 become the universal standard?* J Hypertens, 2019. **37**(6): p. 1148-1153.
3. Mills, K.T., et al., *Global Disparities of Hypertension Prevalence and Control: A Systematic Analysis of Population-Based Studies From 90 Countries*. Circulation, 2016. **134**(6): p. 441-50.
4. Zhou, B., et al., *Worldwide trends in blood pressure from 1975 to 2015: a pooled analysis of 1479 population-based measurement studies with 19.1 million participants*. The Lancet, 2017. **389**(10064): p. 37-55.
5. Zhou, B., et al., *Worldwide trends in hypertension prevalence and progress in treatment and control from 1990 to 2019: a pooled analysis of 1201 population-representative studies with 104 million participants*. The Lancet, 2021. **398**(10304): p. 957-980.
6. Ataklte, F., et al., *Burden of Undiagnosed Hypertension in Sub-Saharan Africa: A Systematic Review and Meta-Analysis*. Hypertension, 2015. **65**(2): p. 291-8.
7. World Health Organization, *Counterfeit medicines: an update on estimates 15 November 2006*. 2013.
8. Rose, A.J., et al., *Understanding uncontrolled hypertension: is it the patient or the provider?* The Journal of Clinical Hypertension, 2007. **9**(12): p. 937-943.
9. Cushman, W., et al., *ALLHAT Collaborative Research Group: success and predictors of blood pressure control in diverse North American settings: the Antihypertensive and Lipid-Lowering Treatment to Prevent Heart Attack Trial (ALLHAT)*. Journal of Clinical Hypertension, 2002. **4**(6): p. 393-404.
10. Chow, C.K., et al., *Prevalence, awareness, treatment, and control of hypertension in rural and urban communities in high-, middle-, and low-income countries*. Jama, 2013. **310**(9): p. 959-968.
11. Degli Esposti, E., et al., *Risk factors for uncontrolled hypertension in Italy*. Journal of Human Hypertension,, 2004. **18**: p. 207.
12. Liu, X. and P. Song, *Is the Association of Diabetes With Uncontrolled Blood Pressure Stronger in Mexican Americans and Blacks Than in Whites Among Diagnosed Hypertensive Patients?* American Journal of Hypertension, 2013. **26**(11): p. 1328-1334.
13. U. K. Prospective Diabetes Study Group, *Tight blood pressure control and risk of macrovascular and microvascular complications in type 2 diabetes: UKPDS 38*. UK Prospective Diabetes Study Group. BMJ (Clinical research ed.), 1998. **317**(7160): p. 703-713.
14. Cappuccio, F.P., et al., *A community programme to reduce salt intake and blood pressure in Ghana [ISRCTN88789643]*. BMC Public Health, 2006. **6**: p. 13.
15. Oti, S.O., et al., *Outcomes and costs of implementing a community-based intervention for hypertension in an urban slum in Kenya*. Bull World Health Organ, 2016. **94**(7): p. 501-9.
16. van de Vijver, S., et al., *Impact evaluation of a community-based intervention for prevention of cardiovascular diseases in the slums of Nairobi: the SCALE-UP study*. Glob Health Action, 2016. **9**: p. 30922.
17. Ozoemena, E.L., et al., *Effects of a health education intervention on hypertension-related knowledge, prevention and self-care practices in Nigerian retirees: a quasi-experimental study*. Archives of Public Health, 2019. **77**(1): p. 23.
18. Mohamed, S.F., et al., *Prevalence, awareness, treatment and control of hypertension and their determinants: results from a national survey in Kenya*. BMC Public Health, 2018. **18**(Suppl 3): p. 1219.

19. Monakali, S., et al., *Prevalence, awareness, control and determinants of hypertension among primary health care professional nurses in Eastern Cape, South Africa*. 2018, 2018. **10**(1).
20. Guwatudde, D., et al., *The epidemiology of hypertension in Uganda: findings from the national non-communicable diseases risk factor survey*. PLoS one, 2015. **10**(9): p. e0138991.
21. Mayige, M. and G. Kagaruki, *Tanzania Steps Survey Report*. 2013.
22. Msyamboza, K.P., et al., *The burden of hypertension and its risk factors in Malawi: nationwide population-based STEPS survey*. International health, 2012. **4**(4): p. 246-252.
23. Mohamed, S.F., et al., *Uncontrolled hypertension among patients with comorbidities in sub-Saharan Africa: protocol for a systematic review and meta-analysis*. Systematic Reviews, 2020. **9**(1): p. 16.
24. Moher, D., et al., *Preferred reporting items for systematic reviews and meta-analyses: the PRISMA statement*. 2009. **339**: p. b2535.
25. Hoy, D., et al., *Assessing risk of bias in prevalence studies: modification of an existing tool and evidence of interrater agreement*. Journal of clinical epidemiology, 2012. **65**(9): p. 934-939.
26. Higgins, J.P. and S.G. Thompson, *Quantifying heterogeneity in a meta-analysis*. Statistics in Medicine,, 2002. **21**(11): p. 1539-58.
27. Higgins, J.P.T., et al., *Measuring inconsistency in meta-analyses*. BMJ (Clinical research ed.), 2003. **327**(7414): p. 557-560.
28. Egger, M., et al., *Bias in meta-analysis detected by a simple, graphical test*. Bmj, 1997. **315**(7109): p. 629-634.
29. Abboud, H., et al., *Demographics, socio-economic characteristics, and risk factor prevalence in patients with non-cardioembolic ischaemic stroke in low- and middle-income countries: the OPTIC registry*. International journal of stroke, 2013. **8 Suppl A100**: p. 4-13.
30. Abera, H. and M. Woldemichael, *Pattern of antihypertensive therapy among diabetic hypertensive patients in Zewditu memorial hospital, Addis Ababa*. Ethiopian Medical Journal,, 2016. **54**(2): p. 77-82.
31. Adeniyi, O.V., et al., *Uncontrolled Hypertension and Its Determinants in Patients with Concomitant Type 2 Diabetes Mellitus (T2DM) in Rural South Africa*. PLoS One, 2016. **11**(3): p. e0150033.
32. Agaba, E.I., et al., *Chronic kidney disease screening and renoprotection in type 2 diabetes*. Annals of African Medicine,, 2009. **8**(1): p. 52-4.
33. Babua, C., et al., *Cardiovascular risk factors among patients with chronic kidney disease attending a tertiary hospital in Uganda*. Cardiovascular journal of Africa, 2015. **26**(4): p. 177-80.
34. Choukem, S.P., et al., *Hypertension in people with diabetes in sub-Saharan Africa: revealing the hidden face of the iceberg*. Diabetes Research and Clinical Practice,, 2007. **77**(2): p. 293-9.
35. Cohen, D.B., et al., *A survey of the management, control, and complications of diabetes mellitus in patients attending a diabetes clinic in Blantyre, Malawi, an area of high HIV prevalence*. The American Journal of Tropical Medicine and Hygiene,, 2010. **83**(3): p. 575-81.
36. Hyle, E.P., et al., *Cardiovascular risk factors among ART-experienced people with HIV in South Africa*. Journal of the International AIDS Society, 2019. **22**(4): p. e25274.
37. Jardine, R.M., J. Fine, and I.W. Obel, *A survey on the treatment of atrial fibrillation in South Africa*. South African Medical Journal, , 2014. **104**(9): p. 623-7.
38. Muddu, M., et al., *Integrated Hypertension and HIV Care Cascades in an HIV Treatment Program in Eastern Uganda: A Retrospective Cohort Study*. Journal of Acquired Immune deficiency Syndromes, , 2019. **81**(5): p. 552-561.
39. Mwita, J.C., et al., *Hypertension control and other cardiovascular risk factors among diabetic patients at Muhimbili National Hospital, Tanzania*. East African Journal of Public Health,, 2012. **9**(2): p. 70-3.

- 1
- 2
- 3
- 4 40. Pinchevsky, Y., et al., *Treatment Gaps Found in the Management of Type 2 Diabetes at a*
- 5 *Community Health Centre in Johannesburg, South Africa.* Journal of Diabetes Research,,
- 6 2017. **2017**: p. 9536025.
- 7 41. Pinchevsky, Y., et al., *The implementation of guidelines in a South African population with*
- 8 *type 2 diabetes.* Journal of Endocrinology, Metabolism and Diabetes of South Africa, 2013.
- 9 **18**(3): p. 154-158.
- 10 42. Rotchford, A.P. and K.M. Rotchford, *Diabetes in rural South Africa--an assessment of care*
- 11 *and complications.* South African medical journal, 2002. **92**(7): p. 536-41.
- 12 43. Soetedjo, N.N.M., et al., *Disease characteristics and treatment of patients with diabetes*
- 13 *mellitus attending government health services in Indonesia, Peru, Romania and South Africa.*
- 14 *Tropical medicine & international health*, 2018. **23**(10): p. 1118-1128.
- 15 44. Steffen, H., et al., *Hypertension prevalence, awareness, treatment and control in ambulatory*
- 16 *treatment-naïve HIV infected patients in Lilongwe, Malawi.* Journal of Hypertension,, 2017.
- 17 **35**.
- 18 45. Wahab, K.W., et al., *Blood Pressure Control among Hypertensive Stroke Survivors in Nigeria.*
- 19 *Journal of stroke and cerebrovascular diseases*, 2017. **26**(6): p. 1222-1227.
- 20 46. Yaméogo, N.V., et al., *Control of cardiovascular risk in black Africans with type 2 diabetes in*
- 21 *Senegal.* Cardiovascular Journal of Africa, 2012. **23**(5): p. 270-272.
- 22 47. Fiseha, T., et al., *Hypertension in HIV-Infected Patients Receiving Antiretroviral Therapy in*
- 23 *Northeast Ethiopia.* International journal of hypertension, 2019. **2019**: p. 4103604-4103604.
- 24 48. Manavalan, P., et al., *Hypertension burden and challenges across the hypertension treatment*
- 25 *cascade among adults enrolled in HIV care in northern Tanzania.* J Clin Hypertens
- 26 (Greenwich), 2020. **22**(8): p. 1518-1522.
- 27 49. Xu, Y., X. Chen, and K. Wang, *Global prevalence of hypertension among people living with*
- 28 *HIV: a systematic review and meta-analysis.* J Am Soc Hypertens, 2017. **11**(8): p. 530-540.
- 29 50. Githinji, G.G., et al., *Prevalence of diabetes and co-morbidities in five rural and semi-urban*
- 30 *Kenyan counties, 2010–2015.* International Journal of Diabetes in Developing Countries,,
- 31 2018. **38**(2): p. 243-248.
- 32 51. Abegaz, T.M., et al., *Nonadherence to antihypertensive drugs: A systematic review and meta-*
- 33 *analysis.* Medicine (Baltimore), 2017. **96**(4): p. e5641.
- 34
- 35
- 36
- 37
- 38
- 39
- 40
- 41
- 42
- 43
- 44
- 45
- 46
- 47
- 48
- 49
- 50
- 51
- 52
- 53
- 54
- 55
- 56
- 57
- 58
- 59
- 60

Figure 1: Study selection flow diagram



Figure 2: Funnel plot of the prevalence of uncontrolled hypertension in people with comorbidities in sub-Saharan Africa

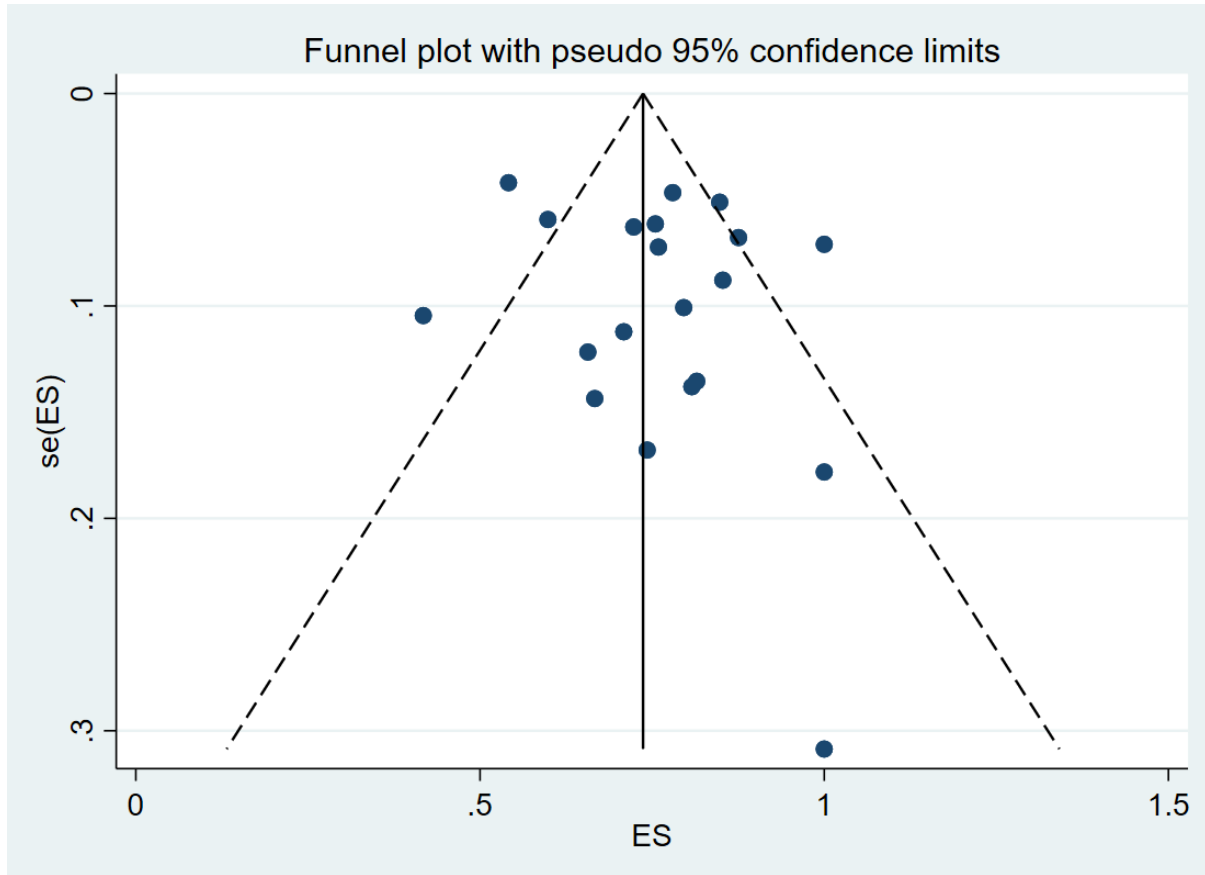

Figure 3: Pooled prevalence of uncontrolled hypertension in people with comorbidities in sub-Saharan Africa, by comorbidities

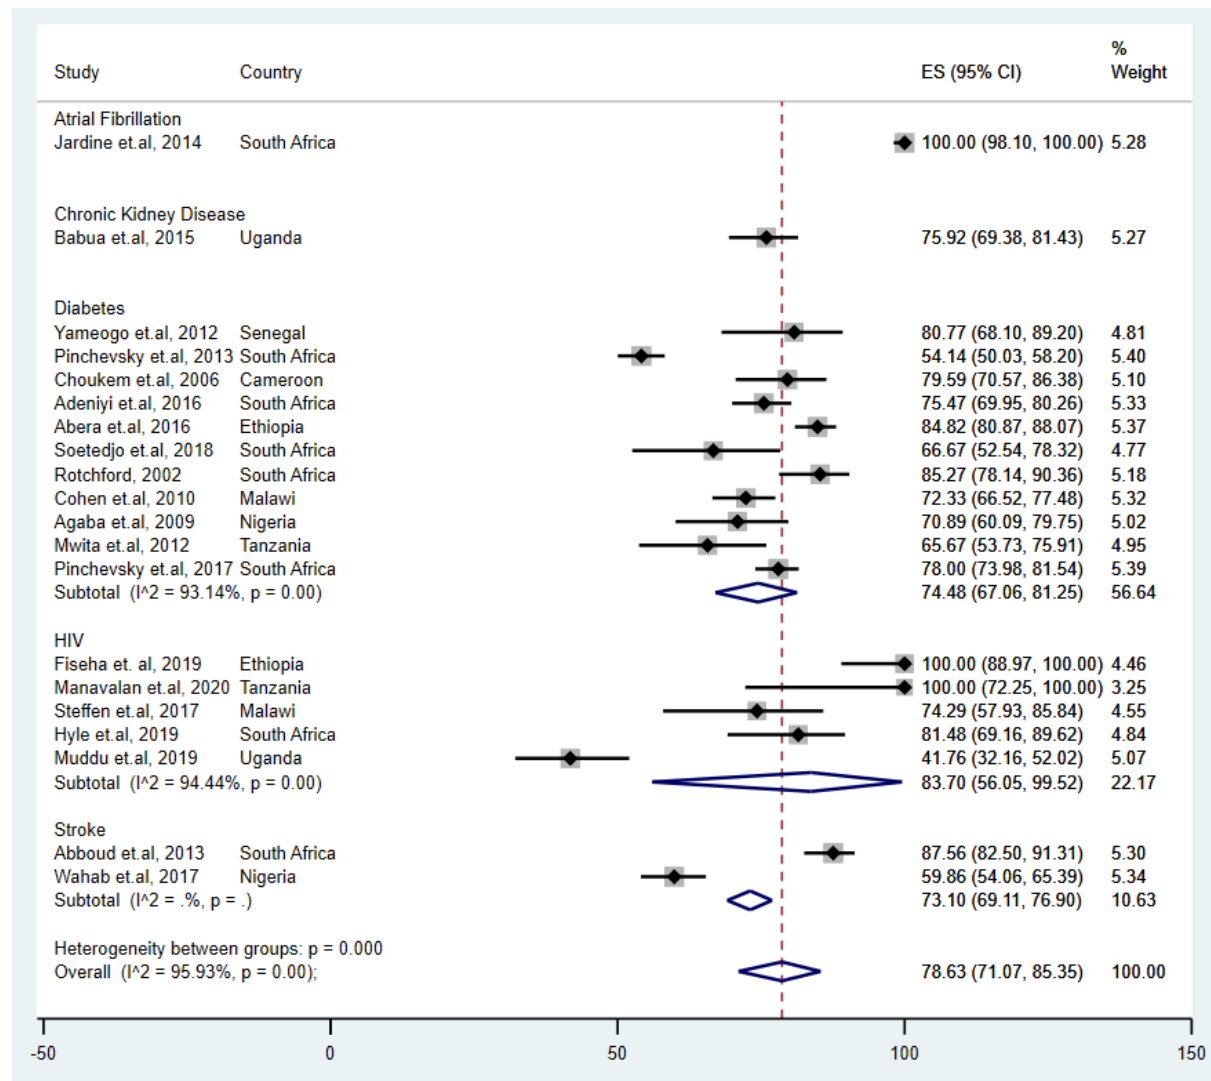



Figure 4: Funnel plot of the prevalence of uncontrolled hypertension in people with diabetes in sub-Saharan Africa



**Supplementary file S1 – Search strategy****Medline - search**

1. exp Hypertension/ or hypertension.mp.
2. exp Hypertension/ or uncontrolled hypertension.mp.
3. exp Hypertension/ or uncontrolled blood pressure.mp.
4. high blood pressure.mp. or exp Hypertension/
5. 1 or 2 or 3 or 4
6. type 2 diabetes mellitus.mp. or exp Diabetes Mellitus, Type 2/
7. type 2 diabetes.mp. or exp Diabetes Mellitus, Type 2/
8. exp Diabetes Mellitus, Type 2/ or type II diabetes.mp.
9. dyslipidemia.mp. or exp Dyslipidemias/
10. exp Dyslipidemias/ or dyslipidimia.mp.
11. exp Dyslipidemias/ or dyslipidaemia.mp.
12. Hypercholesterolemia.mp. or exp Hypercholesterolemia/
13. Hypercholesterolaemia.mp. or exp Hypercholesterolemia/
14. Hypercholesterolimia.mp. [mp=title, abstract, original title, name of substance word, subject heading word, floating sub-heading word, keyword heading word, organism supplementary concept word, protocol supplementary concept word, rare disease supplementary concept word, unique identifier, synonyms]
15. hypertriglyceridemia.mp. or exp Hypertriglyceridemia/
16. exp Hypertriglyceridemia/ or hypertriglyceridaemia.mp.
17. hypertriglyceridimia.mp.
18. hyperlipidemia.mp. or exp Hyperlipidemias/
19. exp Hyperlipidemias/ or hyperlipidaemia.mp.
20. hyperlipidimia.mp.
21. obesity.mp. or exp Obesity/
22. chronic kidney disease.mp. or exp Renal Insufficiency, Chronic/
23. stroke.mp. or exp Stroke/
24. transient ischemic attack.mp. or exp Ischemic Attack, Transient/
25. Stroke/ or exp Ischemic Attack, Transient/ or transient ischaemic attack.mp.
26. coronary heart disease.mp. or exp Coronary Disease/
27. Heart failure.mp. or exp Heart Failure/
28. peripheral vascular disease.mp. or exp Peripheral Vascular Diseases/
29. atrial fibrillation.mp. or exp Atrial Fibrillation/
30. depression.mp. or exp Depression/
31. HIV/ or HIV.mp.
32. human immunodeficiency virus.mp. or exp HIV/
33. 6 or 7 or 8 or 9 or 10 or 11 or 12 or 13 or 14 or 15 or 16 or 17 or 18 or 19 or 20 or 21 or 22 or 23 or 24 or 25 or 26 or 27 or 28 or 29 or 30 or 31 or 32
34. (Angola or Benin or Botswana or "Burkina Faso" or "Upper Volta" or Burundi or Urundi or Cameroon or Cameroons or "Cape Verde" or "Central African Republic" or Chad or Comoros or "Comoro Islands" or Comores or Mayotte or Congo or Zaire or "Cote d'Ivoire" or "Ivory Coast" or ("Democratic Republic of the Congo" or Djibouti or "French Somaliland" or Eritrea or Ethiopia or Gabon or "Gabonese Republic" or Gambia or Ghana or "Gold Coast" or Guinea or Kenya or Lesotho or Basutoland or Liberia) or (Madagascar or "Malagasy Republic" or Malawi or Nyasaland or Mali or Mauritania or Mauritius or Mozambique or Namibia or Niger or Nigeria) or (Rwanda or "Sao Tome" or Seychelles or Senegal or "Sierra Leone" or Somalia or "South Africa" or Sudan or Swaziland or Tanzania or Togo or "Togolese Republic" or Uganda or Zambia or Zimbabwe or Rhodesia)).mp. [mp=title, abstract, original title, name of substance word, subject heading word, floating sub-heading word, keyword heading word, organism supplementary concept word, protocol supplementary concept word, rare disease supplementary concept word, unique identifier, synonyms]
35. sub-Saharan africa.mp. or exp "Africa South of the Sahara"/
36. subsaharan africa.mp. or exp "Africa South of the Sahara"/
37. 34 or 35 or 36
38. 5 and 33 and 37
39. limit 38 to (humans and yr="2000 - 2021")

**Embase - search**

1. hypertension.mp. or exp hypertension/
2. exp hypertension/ or uncontrolled hypertension.mp. or exp antihypertensive agent/
3. exp antihypertensive agent/ or exp hypertension/ or uncontrolled blood pressure.mp.
4. high blood pressure.mp. or exp hypertension/
5. 1 or 2 or 3 or 4
6. type 2 diabetes mellitus.mp. or exp non insulin dependent diabetes mellitus/
7. type 2 diabetes.mp. or exp non insulin dependent diabetes mellitus/
8. type II diabetes.mp. or exp non insulin dependent diabetes mellitus/
9. dyslipidemia.mp. or exp dyslipidemia/
10. dyslipidimia.mp.
11. dyslipidaemia.mp. or exp dyslipidemia/
12. exp hypercholesterolemia/ or Hypercholesterolemia.mp.
13. Hypercholesterolaemia.mp. or exp hypercholesterolemia/
14. Hypercholesterolimia.mp.
15. hypertriglyceridemia.mp. or exp hypertriglyceridemia/
16. hypertriglyceridaemia.mp. or exp hypertriglyceridemia/
17. hypertriglyceridimia.mp. or exp hypertriglyceridemia/
18. hyperlipidemia.mp. [mp=title, abstract, original title, name of substance word, subject heading word, floating sub-heading word, keyword heading word, organism supplementary concept word, protocol supplementary concept word, rare disease supplementary concept word, unique identifier, synonyms]
19. hyperlipidaemia.mp. [mp=title, abstract, original title, name of substance word, subject heading word, floating sub-heading word, keyword heading word, organism supplementary concept word, protocol supplementary concept word, rare disease supplementary concept word, unique identifier, synonyms]
20. hyperlipidimia.mp. [mp=title, abstract, original title, name of substance word, subject heading word, floating sub-heading word, keyword heading word, organism supplementary concept word, protocol supplementary concept word, rare disease supplementary concept word, unique identifier, synonyms]
21. obesity.mp. or exp obesity/
22. chronic kidney disease.mp. or exp chronic kidney failure/
23. stroke.mp. or exp cerebrovascular accident/
24. transient ischemic attack.mp. or exp transient ischemic attack/
25. transient ischaemic attack.mp. or exp transient ischemic attack/
26. coronary heart disease.mp. or exp ischemic heart disease/
27. Heart failure.mp. or exp heart failure/
28. peripheral vascular disease.mp. or exp peripheral vascular disease/
29. atrial fibrillation.mp. or exp atrial fibrillation/
30. exp depression/ or depression.mp.
31. HIV.mp. or exp Human immunodeficiency virus/
32. 6 or 7 or 8 or 9 or 10 or 11 or 12 or 13 or 14 or 15 or 16 or 17 or 21 or 22 or 23 or 24 or 25 or 26 or 27 or 28 or 29 or 30 or 31
33. (Angola or Benin or Botswana or "Burkina Faso" or "Upper Volta" or Burundi or Urundi or Cameroon or Cameroons or "Cape Verde" or "Central African Republic" or Chad or Comoros or "Comoro Islands" or Comores or Mayotte or Congo or Zaire or "Cote d'Ivoire" or "Ivory Coast" or ("Democratic Republic of the Congo" or Djibouti or "French Somaliland" or Eritrea or Ethiopia or Gabon or "Gabonese Republic" or Gambia or Ghana or "Gold Coast" or Guinea or Kenya or Lesotho or Basutoland or Liberia) or (Madagascar or "Malagasy Republic" or Malawi or Nyasaland or Mali or Mauritania or Mauritius or Mozambique or Namibia or Niger or Nigeria) or (Rwanda or "Sao Tome" or Seychelles or Senegal or "Sierra Leone" or Somalia or "South Africa" or Sudan or Swaziland or Tanzania or Togo or "Togolese Republic" or Uganda or Zambia or Zimbabwe or Rhodesia)).mp. [mp=title, abstract, original title, name of substance word, subject heading word, floating sub-heading word, keyword heading word, organism supplementary concept word, protocol supplementary concept word, rare disease supplementary concept word, unique identifier, synonyms]
34. sub-Saharan africa.mp. or exp "Africa south of the Sahara"/
35. subsaharan africa.mp. or exp "Africa south of the Sahara"/

36. 33 or 34 or 35

37. 5 and 32 and 36

38. limit 37 to (human and yr="2000 - 2021")

### Web of Science - search

|      |                  |                                                                                                                                                                                                                                                                                                                                                                                                                                                                                                                                                                                                                                                                                                                                                                                                                                                                                                                                                                            |                                                        |
|------|------------------|----------------------------------------------------------------------------------------------------------------------------------------------------------------------------------------------------------------------------------------------------------------------------------------------------------------------------------------------------------------------------------------------------------------------------------------------------------------------------------------------------------------------------------------------------------------------------------------------------------------------------------------------------------------------------------------------------------------------------------------------------------------------------------------------------------------------------------------------------------------------------------------------------------------------------------------------------------------------------|--------------------------------------------------------|
| # 38 | <b>2,114</b>     | #37 AND #33 AND #5<br><i>Indexes=SCI-EXPANDED, SSCI, A&amp;HCI, CPCI-S, CPCI-SSH, ESCI</i><br><i>Timespan=2000-2019</i>                                                                                                                                                                                                                                                                                                                                                                                                                                                                                                                                                                                                                                                                                                                                                                                                                                                    | Edit <input type="checkbox"/> <input type="checkbox"/> |
| # 37 | <b>421,085</b>   | #36 OR #35 OR #34<br><i>Indexes=SCI-EXPANDED, SSCI, A&amp;HCI, CPCI-S, CPCI-SSH, ESCI</i><br><i>Timespan=2000-2019</i>                                                                                                                                                                                                                                                                                                                                                                                                                                                                                                                                                                                                                                                                                                                                                                                                                                                     | Edit <input type="checkbox"/> <input type="checkbox"/> |
| # 36 | <b>301</b>       | TS=(subsaharan Africa)<br><i>Indexes=SCI-EXPANDED, SSCI, A&amp;HCI, CPCI-S, CPCI-SSH, ESCI</i><br><i>Timespan=2000-2019</i>                                                                                                                                                                                                                                                                                                                                                                                                                                                                                                                                                                                                                                                                                                                                                                                                                                                | Edit <input type="checkbox"/> <input type="checkbox"/> |
| # 35 | <b>33,673</b>    | TS=(sub-Saharan Africa)<br><i>Indexes=SCI-EXPANDED, SSCI, A&amp;HCI, CPCI-S, CPCI-SSH, ESCI</i><br><i>Timespan=2000-2019</i>                                                                                                                                                                                                                                                                                                                                                                                                                                                                                                                                                                                                                                                                                                                                                                                                                                               | Edit <input type="checkbox"/> <input type="checkbox"/> |
| # 34 | <b>407,520</b>   | TS=(Angola OR Benin OR Botswana OR "Burkina Faso" OR "Upper Volta" OR Burundi OR Urundi OR Cameroon OR Cameroons OR "Cape Verde" OR "Central African Republic" OR Chad OR Comoros OR "Comoro Islands" OR Comores OR Mayotte OR Congo OR Zaire OR "Cote d'Ivoire" OR "Ivory Coast" OR "Democratic Republic of the Congo" OR Djibouti OR "French Somaliland" OR Eritrea OR Ethiopia OR Gabon OR "Gabonese Republic" OR Gambia OR Ghana OR "Gold Coast" OR Guinea OR Kenya OR Lesotho OR Basutoland OR Liberia OR Madagascar OR "Malagasy Republic" OR Malawi OR Nyasaland OR Mali OR Mauritania OR Mauritius OR Mozambique OR Namibia OR Niger OR Nigeria OR Rwanda OR "Sao Tome" OR Seychelles OR Senegal OR "Sierra Leone" OR Somalia OR "South Africa" OR Sudan OR Swaziland OR Tanzania OR Togo OR "Togolese Republic" OR Uganda OR Zambia OR Zimbabwe OR Rhodesia)<br><i>Indexes=SCI-EXPANDED, SSCI, A&amp;HCI, CPCI-S, CPCI-SSH, ESCI</i><br><i>Timespan=2000-2019</i> | Edit <input type="checkbox"/> <input type="checkbox"/> |
| # 33 | <b>1,764,519</b> | #32 OR #31 OR #30 OR #29 OR #28 OR #27 OR #26 OR #25 OR #24 OR #23 OR #22 OR #21 OR #20 OR #19 OR #18 OR #17 OR #16 OR #15 OR #14 OR #13 OR #12 OR #11 OR #10 OR #9 OR #8 OR #7 OR #6<br><i>Indexes=SCI-EXPANDED, SSCI, A&amp;HCI, CPCI-S, CPCI-SSH, ESCI</i><br><i>Timespan=2000-2019</i>                                                                                                                                                                                                                                                                                                                                                                                                                                                                                                                                                                                                                                                                                 | Edit <input type="checkbox"/> <input type="checkbox"/> |
| # 32 | <b>85,771</b>    | TS=(Human immunodeficiency virus)<br><i>Indexes=SCI-EXPANDED, SSCI, A&amp;HCI, CPCI-S, CPCI-SSH, ESCI</i><br><i>Timespan=2000-2019</i>                                                                                                                                                                                                                                                                                                                                                                                                                                                                                                                                                                                                                                                                                                                                                                                                                                     | Edit <input type="checkbox"/> <input type="checkbox"/> |
| # 31 | <b>272,497</b>   | TS=(HIV)<br><i>Indexes=SCI-EXPANDED, SSCI, A&amp;HCI, CPCI-S, CPCI-SSH, ESCI</i><br><i>Timespan=2000-2019</i>                                                                                                                                                                                                                                                                                                                                                                                                                                                                                                                                                                                                                                                                                                                                                                                                                                                              | Edit <input type="checkbox"/> <input type="checkbox"/> |
| # 30 | <b>369,094</b>   | TS=(depression)                                                                                                                                                                                                                                                                                                                                                                                                                                                                                                                                                                                                                                                                                                                                                                                                                                                                                                                                                            | Edit <input type="checkbox"/> <input type="checkbox"/> |

*Indexes=SCI-EXPANDED, SSCI, A&HCI, CPCI-S, CPCI-SSH, ESCI  
Timespan=2000-2019*

# 29 **80,988** TS=(atrial fibrillation) [Edit](#)    
*Indexes=SCI-EXPANDED, SSCI, A&HCI, CPCI-S, CPCI-SSH, ESCI  
Timespan=2000-2019*

# 28 **20,886** TS=(peripheral vascular disease) [Edit](#)    
*Indexes=SCI-EXPANDED, SSCI, A&HCI, CPCI-S, CPCI-SSH, ESCI  
Timespan=2000-2019*

# 27 **226,090** TS=(heart failure) [Edit](#)    
*Indexes=SCI-EXPANDED, SSCI, A&HCI, CPCI-S, CPCI-SSH, ESCI  
Timespan=2000-2019*

# 26 **144,037** TS=(coronary heart disease) [Edit](#)    
*Indexes=SCI-EXPANDED, SSCI, A&HCI, CPCI-S, CPCI-SSH, ESCI  
Timespan=2000-2019*

# 25 **1,959** TS=(transient ischaemic attack) [Edit](#)    
*Indexes=SCI-EXPANDED, SSCI, A&HCI, CPCI-S, CPCI-SSH, ESCI  
Timespan=2000-2019*

# 24 **11,095** TS=(transient ischemic attack) [Edit](#)    
*Indexes=SCI-EXPANDED, SSCI, A&HCI, CPCI-S, CPCI-SSH, ESCI  
Timespan=2000-2019*

# 23 **278,508** TS=(stroke) [Edit](#)    
*Indexes=SCI-EXPANDED, SSCI, A&HCI, CPCI-S, CPCI-SSH, ESCI  
Timespan=2000-2019*

# 22 **75,433** TS=(chronic kidney disease) [Edit](#)    
*Indexes=SCI-EXPANDED, SSCI, A&HCI, CPCI-S, CPCI-SSH, ESCI  
Timespan=2000-2019*

# 21 **280,562** TS=(obesity) [Edit](#)    
*Indexes=SCI-EXPANDED, SSCI, A&HCI, CPCI-S, CPCI-SSH, ESCI  
Timespan=2000-2019*

# 20 **5** TS=(hyperlipidimia) [Edit](#)    
*Indexes=SCI-EXPANDED, SSCI, A&HCI, CPCI-S, CPCI-SSH, ESCI  
Timespan=2000-2019*

# 19 **2,534** TS=(hyperlipidaemia) [Edit](#)    
*Indexes=SCI-EXPANDED, SSCI, A&HCI, CPCI-S, CPCI-SSH, ESCI  
Timespan=2000-2019*

# 18 **21,065** TS=(hyperlipidemia) [Edit](#)    
*Indexes=SCI-EXPANDED, SSCI, A&HCI, CPCI-S, CPCI-SSH, ESCI  
Timespan=2000-2019*

# 17 **2** TS=(hypertriglyceridimia) [Edit](#)    
*Indexes=SCI-EXPANDED, SSCI, A&HCI, CPCI-S, CPCI-SSH, ESCI  
Timespan=2000-2019*

|    |      |                |                                                                                                                                       |                                                        |
|----|------|----------------|---------------------------------------------------------------------------------------------------------------------------------------|--------------------------------------------------------|
| 1  | # 16 | <b>1,000</b>   | TS=(hypertriglyceridaemia)<br><i>Indexes=SCI-EXPANDED, SSCI, A&amp;HCI, CPCI-S, CPCI-SSH, ESCI</i><br><i>Timespan=2000-2019</i>       | Edit <input type="checkbox"/> <input type="checkbox"/> |
| 2  |      |                |                                                                                                                                       |                                                        |
| 3  |      |                |                                                                                                                                       |                                                        |
| 4  | # 15 | <b>8,591</b>   | TS=(hypertriglyceridemia)<br><i>Indexes=SCI-EXPANDED, SSCI, A&amp;HCI, CPCI-S, CPCI-SSH, ESCI</i><br><i>Timespan=2000-2019</i>        | Edit <input type="checkbox"/> <input type="checkbox"/> |
| 5  |      |                |                                                                                                                                       |                                                        |
| 6  |      |                |                                                                                                                                       |                                                        |
| 7  |      |                |                                                                                                                                       |                                                        |
| 8  |      |                |                                                                                                                                       |                                                        |
| 9  | # 14 | <b>0</b>       | TS=(hypercholesterolimia)<br><i>Indexes=SCI-EXPANDED, SSCI, A&amp;HCI, CPCI-S, CPCI-SSH, ESCI</i><br><i>Timespan=2000-2019</i>        | Edit <input type="checkbox"/> <input type="checkbox"/> |
| 10 |      |                |                                                                                                                                       |                                                        |
| 11 |      |                |                                                                                                                                       |                                                        |
| 12 |      |                |                                                                                                                                       |                                                        |
| 13 | # 13 | <b>3,188</b>   | TS=(hypercholesterolaemia)<br><i>Indexes=SCI-EXPANDED, SSCI, A&amp;HCI, CPCI-S, CPCI-SSH, ESCI</i><br><i>Timespan=2000-2019</i>       | Edit <input type="checkbox"/> <input type="checkbox"/> |
| 14 |      |                |                                                                                                                                       |                                                        |
| 15 |      |                |                                                                                                                                       |                                                        |
| 16 |      |                |                                                                                                                                       |                                                        |
| 17 |      |                |                                                                                                                                       |                                                        |
| 18 | # 12 | <b>27,232</b>  | TS=(hypercholesterolemia)<br><i>Indexes=SCI-EXPANDED, SSCI, A&amp;HCI, CPCI-S, CPCI-SSH, ESCI</i><br><i>Timespan=2000-2019</i>        | Edit <input type="checkbox"/> <input type="checkbox"/> |
| 19 |      |                |                                                                                                                                       |                                                        |
| 20 |      |                |                                                                                                                                       |                                                        |
| 21 |      |                |                                                                                                                                       |                                                        |
| 22 | # 11 | <b>4,539</b>   | TS=(dyslipidaemia)<br><i>Indexes=SCI-EXPANDED, SSCI, A&amp;HCI, CPCI-S, CPCI-SSH, ESCI</i><br><i>Timespan=2000-2019</i>               | Edit <input type="checkbox"/> <input type="checkbox"/> |
| 23 |      |                |                                                                                                                                       |                                                        |
| 24 |      |                |                                                                                                                                       |                                                        |
| 25 |      |                |                                                                                                                                       |                                                        |
| 26 |      |                |                                                                                                                                       |                                                        |
| 27 | # 10 | <b>6</b>       | TS=(dyslipidimia)<br><i>Indexes=SCI-EXPANDED, SSCI, A&amp;HCI, CPCI-S, CPCI-SSH, ESCI</i><br><i>Timespan=2000-2019</i>                | Edit <input type="checkbox"/> <input type="checkbox"/> |
| 28 |      |                |                                                                                                                                       |                                                        |
| 29 |      |                |                                                                                                                                       |                                                        |
| 30 |      |                |                                                                                                                                       |                                                        |
| 31 | # 9  | <b>25,588</b>  | TS=(dyslipidemia)<br><i>Indexes=SCI-EXPANDED, SSCI, A&amp;HCI, CPCI-S, CPCI-SSH, ESCI</i><br><i>Timespan=2000-2019</i>                | Edit <input type="checkbox"/> <input type="checkbox"/> |
| 32 |      |                |                                                                                                                                       |                                                        |
| 33 |      |                |                                                                                                                                       |                                                        |
| 34 |      |                |                                                                                                                                       |                                                        |
| 35 |      |                |                                                                                                                                       |                                                        |
| 36 | # 8  | <b>16,630</b>  | TS=(type II diabetes)<br><i>Indexes=SCI-EXPANDED, SSCI, A&amp;HCI, CPCI-S, CPCI-SSH, ESCI</i><br><i>Timespan=2000-2019</i>            | Edit <input type="checkbox"/> <input type="checkbox"/> |
| 37 |      |                |                                                                                                                                       |                                                        |
| 38 |      |                |                                                                                                                                       |                                                        |
| 39 |      |                |                                                                                                                                       |                                                        |
| 40 | # 7  | <b>173,805</b> | TS=(type 2 diabetes)<br><i>Indexes=SCI-EXPANDED, SSCI, A&amp;HCI, CPCI-S, CPCI-SSH, ESCI</i><br><i>Timespan=2000-2019</i>             | Edit <input type="checkbox"/> <input type="checkbox"/> |
| 41 |      |                |                                                                                                                                       |                                                        |
| 42 |      |                |                                                                                                                                       |                                                        |
| 43 |      |                |                                                                                                                                       |                                                        |
| 44 |      |                |                                                                                                                                       |                                                        |
| 45 | # 6  | <b>94,317</b>  | TS=(Type 2 diabetes mellitus)<br><i>Indexes=SCI-EXPANDED, SSCI, A&amp;HCI, CPCI-S, CPCI-SSH, ESCI</i><br><i>Timespan=2000-2019</i>    | Edit <input type="checkbox"/> <input type="checkbox"/> |
| 46 |      |                |                                                                                                                                       |                                                        |
| 47 |      |                |                                                                                                                                       |                                                        |
| 48 |      |                |                                                                                                                                       |                                                        |
| 49 | # 5  | <b>375,418</b> | #4 OR #3 OR #2 OR #1<br><i>Indexes=SCI-EXPANDED, SSCI, A&amp;HCI, CPCI-S, CPCI-SSH, ESCI</i><br><i>Timespan=2000-2019</i>             | Edit <input type="checkbox"/> <input type="checkbox"/> |
| 50 |      |                |                                                                                                                                       |                                                        |
| 51 |      |                |                                                                                                                                       |                                                        |
| 52 |      |                |                                                                                                                                       |                                                        |
| 53 | # 4  | <b>113,713</b> | TS=(high blood pressure)<br><i>Indexes=SCI-EXPANDED, SSCI, A&amp;HCI, CPCI-S, CPCI-SSH, ESCI</i><br><i>Timespan=2000-2019</i>         | Edit <input type="checkbox"/> <input type="checkbox"/> |
| 54 |      |                |                                                                                                                                       |                                                        |
| 55 |      |                |                                                                                                                                       |                                                        |
| 56 |      |                |                                                                                                                                       |                                                        |
| 57 |      |                |                                                                                                                                       |                                                        |
| 58 | # 3  | <b>3,503</b>   | TS=(uncontrolled blood pressure)<br><i>Indexes=SCI-EXPANDED, SSCI, A&amp;HCI, CPCI-S, CPCI-SSH, ESCI</i><br><i>Timespan=2000-2019</i> | Edit <input type="checkbox"/> <input type="checkbox"/> |
| 59 |      |                |                                                                                                                                       |                                                        |
| 60 |      |                |                                                                                                                                       |                                                        |

- # 2 **4,063** TS=(uncontrolled hypertension)  
*Indexes=SCI-EXPANDED, SSCI, A&HCI, CPCI-S, CPCI-SSH, ESCI*  
*Timespan=2000-2019* Edit
- # 1 **307,652** **TOPIC:** (hypertension)  
*Indexes=SCI-EXPANDED, SSCI, A&HCI, CPCI-S, CPCI-SSH, ESCI*  
*Timespan=2000-2019*

Table S1: List of 11 conditions included as comorbidity

|    | Conditions                                                            |
|----|-----------------------------------------------------------------------|
| 1  | Diabetes                                                              |
| 2  | Hypercholesterolemia/dyslipidemia/hyperlipidemia/hypertriglyceridemia |
| 3  | Obesity                                                               |
| 4  | Chronic kidney disease                                                |
| 5  | Stroke and or transient Ischemic attack                               |
| 6  | Coronary heart disease                                                |
| 7  | Heart failure                                                         |
| 8  | Peripheral vascular disease                                           |
| 9  | Atrial fibrillation                                                   |
| 10 | Depression                                                            |
| 11 | HIV                                                                   |

Table S2: Assessment of Risk of Bias (RoB)

|    | External validity                                                                             | Yes/No |   | Internal validity                                                                                        | Yes/No |
|----|-----------------------------------------------------------------------------------------------|--------|---|----------------------------------------------------------------------------------------------------------|--------|
| 1  | Was the target population representative of the population in relation to relevant variables? |        | 5 | Were data collected directly from the subjects (as opposed to a proxy)?                                  |        |
| 2  | Was the sampling frame a true or close representation of the target population?               |        | 6 | Was an acceptable case definition used in the study?                                                     |        |
| 3  | Was some form of random selection used to select the sample, OR was a census undertaken?      |        | 7 | Was the study instrument that measured the parameter of interest shown to have validity and reliability? |        |
| 4  | Was the likelihood of nonresponse bias minimal in the study?                                  |        | 8 | Was the same mode of data collection used for all subjects?                                              |        |
|    |                                                                                               |        | 9 | Were the numerator(s) and denominator(s) for the parameter of interest appropriate?                      |        |
| 10 | Summary item on the overall risk of study bias                                                |        |   |                                                                                                          |        |

*Adapted from Hoy D, Brooks P, Woolf A, Blyth F, March L, Bain C, et al. Assessing risk of bias in prevalence studies: modification of an existing tool and evidence of interrater agreement. Journal of clinical epidemiology. 2012;65(9):934-9.*

Table S3: Characteristics of studies in the prevalence of uncontrolled hypertension in sub-Saharan Africa

|                                            |                  |
|--------------------------------------------|------------------|
| Year of publication (n = 20)               | 2002-2020        |
| Period of inclusion (n = 20)               | 2000-2021        |
| Mean age, years (n = 20)                   | 56.8(±0.12)      |
| % of males (n = 20)                        | 41.8(±0.27)      |
|                                            |                  |
| <b>Comorbidities</b>                       | <b>N studies</b> |
| Diabetes                                   | 11               |
| HIV                                        | 5                |
| Stroke                                     | 2                |
| Atrial fibrillation                        | 1                |
| Chronic Kidney Disease (CKD)               | 1                |
| <b>sub-Saharan African regions</b>         |                  |
| Eastern Africa                             | 6                |
| Western Africa                             | 3                |
| Central Africa                             | 1                |
| Central Africa                             | 10               |
| <b>Study design</b>                        |                  |
| Cross sectional                            | 19               |
| Not reported                               | 1                |
| <b>Sampling</b>                            |                  |
| Consecutive                                | 16               |
| Random                                     | 2                |
| Not reported                               | 2                |
| <b>Timing of data collection</b>           |                  |
| Retrospectively                            | 5                |
| Prospectively                              | 14               |
| Not reported                               | 1                |
| <b>Data sources</b>                        |                  |
| Medical records                            | 5                |
| Participants                               | 11               |
| from both medical records and participants | 3                |
| Not reported                               | 1                |
| <b>Study site</b>                          |                  |
| Hospital                                   | 12               |
| Health Center                              | 8                |
| <b>Gross National Income (GNI)</b>         |                  |
| Below sub-Saharan Africa average           | 9                |
| Above sub-Saharan Africa average           | 11               |



Table 4: Meta-regression analysis for the variation of the prevalence of uncontrolled hypertension in people with comorbidity in SSA

| Variables (reference)                                           | Univariate analysis |              |                     |                    | Multivariate analysis |                     |
|-----------------------------------------------------------------|---------------------|--------------|---------------------|--------------------|-----------------------|---------------------|
|                                                                 | N studies           | P value      | Odds ratio (95% CI) | R <sup>2</sup> , % | P-value               | Odds ratio (95% CI) |
| <b>Year of publication (after 2015)</b>                         | 20                  | 0.595        | 0.96 (0.83; 1.11)   | 0.00               |                       |                     |
| <b>More females</b>                                             | 20                  | 0.172        | 0.09 (-0.04; 0.23)  | 11.35              |                       |                     |
| <b>Risk of bias (low)</b>                                       | 20                  |              |                     | 18.41              |                       |                     |
| Moderate                                                        |                     | 0.923        | 0.99 (0.76; 1.29)   |                    |                       |                     |
| High                                                            |                     | <b>0.080</b> | 1.22 (0.97; 1.53)   |                    |                       |                     |
| <b>Sample size (small studies)</b>                              | 20                  |              |                     | 0                  |                       |                     |
| Large studies                                                   |                     | 0.563        | 1.04 (0.90; 1.21)   |                    |                       |                     |
| <b>SSA regions (Eastern)</b>                                    | 20                  |              |                     | 0.00               |                       |                     |
| Western                                                         |                     | 0.636        | 0.95 (0.74; 1.21)   |                    |                       |                     |
| Central                                                         |                     | 0.747        | 1.06 (0.73; 1.53)   |                    |                       |                     |
| Southern                                                        |                     | 0.679        | 1.04 (0.87; 1.24)   |                    |                       |                     |
| <b>Comorbidities (atrial fibrillation)</b>                      | 20                  |              |                     | 3.50               |                       |                     |
| Chronic kidney disease                                          |                     | 0.222        | 0.78 (0.53; 1.16)   |                    |                       |                     |
| Diabetes                                                        |                     | 0.082        | 0.77 (0.58; 1.03)   |                    |                       |                     |
| HIV                                                             |                     | 0.097        | 0.75 (0.53; 1.06)   |                    |                       |                     |
| Stroke                                                          |                     | 0.119        | 0.76 (0.54; 1.08)   |                    |                       |                     |
| <b>Setting (Health center)</b>                                  | 20                  |              |                     | 0                  |                       |                     |
| Hospital                                                        |                     | 0.958        | 1.00 (0.86; 1.17)   |                    |                       |                     |
| <b>Sampling (Consecutive)</b>                                   | 18                  |              |                     | 0                  |                       |                     |
| Random                                                          |                     | 0.536        | 0.94 (0.75; 1.16)   |                    |                       |                     |
| <b>BP target used (recommended comorbidity target not used)</b> | 20                  |              |                     | 21.34              |                       |                     |
| Recommended BP control used                                     |                     | 0.111        | 0.90 (0.79; 1.03)   |                    |                       |                     |
| <b>GNI (Below SSA average)</b>                                  | 20                  |              |                     |                    |                       |                     |
| Above SSA average                                               |                     | 0.821        | 1.02 (0.88; 1.18)   | 0                  |                       |                     |

BP=Blood pressure

1  
2  
3  
4  
5  
6  
7  
8  
9  
10  
11  
12  
13  
14  
15  
16  
17  
18  
19  
20  
21  
22  
23  
24  
25  
26  
27  
28  
29  
30  
31  
32  
33  
34  
35  
36  
37  
38  
39  
40  
41  
42  
43  
44  
45  
46

Table S5: Meta-regression analysis for the variation of the prevalence of uncontrolled hypertension in people with diabetes in SSA

| Variables (reference)                                           | Univariate analysis |              |                           |                    | Multivariate analysis |                               |
|-----------------------------------------------------------------|---------------------|--------------|---------------------------|--------------------|-----------------------|-------------------------------|
|                                                                 | N studies           | P value      | Coefficient (95% CI)      | R <sup>2</sup> , % | P value               | Adjusted coefficient (95% CI) |
| <b>Year of publication (after 2015)</b>                         | 11                  | 0.274        | 0.0793 (-0.0748; 0.2334)  | 18.20              |                       |                               |
| <b>More females</b>                                             | 11                  | 0.205        | 0.1157 (-0.0758; 0.3072)  | 16.26              |                       |                               |
| <b>Risk of bias (low)</b>                                       | 11                  |              |                           | -15.57             |                       |                               |
| Moderate                                                        |                     | 0.858        | -0.0278 (-0.3753; 0.3198) |                    |                       |                               |
| High                                                            |                     | 0.688        | 0.0711 (-0.3228; 0.4650)  |                    |                       |                               |
| <b>Sample size (small studies)</b>                              | 11                  |              |                           | -11.04             |                       |                               |
| Large studies                                                   |                     | 0.89         | .0115 (-0.1714; 0.1943)   |                    |                       |                               |
| <b>SSA regions (Eastern)</b>                                    | 11                  |              |                           | -18.36             |                       |                               |
| Western                                                         |                     | 0.815        | -.0341 (-0.3664; 0.2982)  |                    |                       |                               |
| Central                                                         |                     | 0.952        | .0101 (-0.3755; 0.3956)   |                    |                       |                               |
| Southern                                                        |                     | 0.500        | -0.0709 (-0.3067; 0.1649) |                    |                       |                               |
| <b>Setting (Health center)</b>                                  | 11                  |              |                           | -15.43             |                       |                               |
| Hospital                                                        |                     | 0.860        | .0160 (-0.1825; 0.2144)   |                    |                       |                               |
| <b>Sampling (Consecutive)</b>                                   | 10                  |              |                           |                    |                       |                               |
| Random                                                          |                     | <b>0.001</b> | -0.2366 (-0.3477 -0.1255) | 100.00             | <b>0.043</b>          | -0.1880 (-0.3686; -0.0074 )   |
| <b>BP target used (recommended diabetes BP target not used)</b> | 11                  |              |                           | 56.66              | 0.439                 | -0.0563 (-0.2188; 0.1062)     |
| Recommended diabetes BP control target used                     |                     | <b>0.054</b> | -0.1320 (-0.2671; 0.0030) |                    |                       |                               |
| <b>GNI (Below SSA average)</b>                                  | 11                  |              |                           |                    |                       |                               |
| Above SSA average                                               |                     | 0.401        | -0.0633 (-0.2256; 0.0991) | 3.10               |                       |                               |
| <b>Mean age</b>                                                 | 11                  | 0.296        | 0.0047 (-0.0046; 0.0139)  | -0.16              |                       |                               |

BP=Blood pressure



# PRISMA 2009 Checklist

| Section/topic                      | #  | Checklist item                                                                                                                                                                                                                                                                                              | Reported on page # |
|------------------------------------|----|-------------------------------------------------------------------------------------------------------------------------------------------------------------------------------------------------------------------------------------------------------------------------------------------------------------|--------------------|
| <b>TITLE</b>                       |    |                                                                                                                                                                                                                                                                                                             |                    |
| Title                              | 1  | Identify the report as a systematic review, meta-analysis, or both.                                                                                                                                                                                                                                         | 1                  |
| <b>ABSTRACT</b>                    |    |                                                                                                                                                                                                                                                                                                             |                    |
| Structured summary                 | 2  | Provide a structured summary including, as applicable: background; objectives; data sources; study eligibility criteria, participants, and interventions; study appraisal and synthesis methods; results; limitations; conclusions and implications of key findings; systematic review registration number. | 2                  |
| <b>INTRODUCTION</b>                |    |                                                                                                                                                                                                                                                                                                             |                    |
| Rationale                          | 3  | Describe the rationale for the review in the context of what is already known.                                                                                                                                                                                                                              | 3                  |
| Objectives                         | 4  | Provide an explicit statement of questions being addressed with reference to participants, interventions, comparisons, outcomes, and study design (PICOS).                                                                                                                                                  | 4                  |
| <b>METHODS</b>                     |    |                                                                                                                                                                                                                                                                                                             |                    |
| Protocol and registration          | 5  | Indicate if a review protocol exists, if and where it can be accessed (e.g., Web address), and, if available, provide registration information including registration number.                                                                                                                               | 4                  |
| Eligibility criteria               | 6  | Specify study characteristics (e.g., PICOS, length of follow-up) and report characteristics (e.g., years considered, language, publication status) used as criteria for eligibility, giving rationale.                                                                                                      | 4-5                |
| Information sources                | 7  | Describe all information sources (e.g., databases with dates of coverage, contact with study authors to identify additional studies) in the search and date last searched.                                                                                                                                  | 4-5                |
| Search                             | 8  | Present full electronic search strategy for at least one database, including any limits used, such that it could be repeated.                                                                                                                                                                               | Supplement file 1  |
| Study selection                    | 9  | State the process for selecting studies (i.e., screening, eligibility, included in systematic review, and, if applicable, included in the meta-analysis).                                                                                                                                                   | 5                  |
| Data collection process            | 10 | Describe method of data extraction from reports (e.g., piloted forms, independently, in duplicate) and any processes for obtaining and confirming data from investigators.                                                                                                                                  | 5                  |
| Data items                         | 11 | List and define all variables for which data were sought (e.g., PICOS, funding sources) and any assumptions and simplifications made.                                                                                                                                                                       | 5                  |
| Risk of bias in individual studies | 12 | Describe methods used for assessing risk of bias of individual studies (including specification of whether this was done at the study or outcome level), and how this information is to be used in any data synthesis.                                                                                      | 5-6                |
| Summary measures                   | 13 | State the principal summary measures (e.g., risk ratio, difference in means).                                                                                                                                                                                                                               | 6                  |
| Synthesis of results               | 14 | Describe the methods of handling data and combining results of studies, if done, including measures of consistency (e.g., $I^2$ ) for each meta-analysis.                                                                                                                                                   | 6                  |



# PRISMA 2009 Checklist

Page 1 of 2

| Section/topic                 | #  | Checklist item                                                                                                                                                                                           | Reported on page # |
|-------------------------------|----|----------------------------------------------------------------------------------------------------------------------------------------------------------------------------------------------------------|--------------------|
| Risk of bias across studies   | 15 | Specify any assessment of risk of bias that may affect the cumulative evidence (e.g., publication bias, selective reporting within studies).                                                             | 7                  |
| Additional analyses           | 16 | Describe methods of additional analyses (e.g., sensitivity or subgroup analyses, meta-regression), if done, indicating which were pre-specified.                                                         | 6                  |
| <b>RESULTS</b>                |    |                                                                                                                                                                                                          |                    |
| Study selection               | 17 | Give numbers of studies screened, assessed for eligibility, and included in the review, with reasons for exclusions at each stage, ideally with a flow diagram.                                          | 7 and figure 1     |
| Study characteristics         | 18 | For each study, present characteristics for which data were extracted (e.g., study size, PICOS, follow-up period) and provide the citations.                                                             | 7-8                |
| Risk of bias within studies   | 19 | Present data on risk of bias of each study and, if available, any outcome level assessment (see item 12).                                                                                                | 10                 |
| Results of individual studies | 20 | For all outcomes considered (benefits or harms), present, for each study: (a) simple summary data for each intervention group (b) effect estimates and confidence intervals, ideally with a forest plot. | 9-12 and figure 3  |
| Synthesis of results          | 21 | Present results of each meta-analysis done, including confidence intervals and measures of consistency.                                                                                                  | 10-14              |
| Risk of bias across studies   | 22 | Present results of any assessment of risk of bias across studies (see Item 15).                                                                                                                          | 10                 |
| Additional analysis           | 23 | Give results of additional analyses, if done (e.g., sensitivity or subgroup analyses, meta-regression [see Item 16]).                                                                                    | 11-13              |
| <b>DISCUSSION</b>             |    |                                                                                                                                                                                                          |                    |
| Summary of evidence           | 24 | Summarize the main findings including the strength of evidence for each main outcome; consider their relevance to key groups (e.g., healthcare providers, users, and policy makers).                     | 14-16              |
| Limitations                   | 25 | Discuss limitations at study and outcome level (e.g., risk of bias), and at review-level (e.g., incomplete retrieval of identified research, reporting bias).                                            | 17                 |
| Conclusions                   | 26 | Provide a general interpretation of the results in the context of other evidence, and implications for future research.                                                                                  | 17                 |
| <b>FUNDING</b>                |    |                                                                                                                                                                                                          |                    |
| Funding                       | 27 | Describe sources of funding for the systematic review and other support (e.g., supply of data); role of funders for the systematic review.                                                               | 17                 |

From: Moher D, Liberati A, Tetzlaff J, Altman DG, The PRISMA Group (2009). Preferred Reporting Items for Systematic Reviews and Meta-Analyses: The PRISMA Statement. PLoS Med 6(7): e1000097. doi:10.1371/journal.pmed1000097

For more information, visit: [www.prisma-statement.org](http://www.prisma-statement.org).
