# Supplementary material for: Prevalence of uncontrolled hypertension in people with comorbidities in sub-Saharan Africa: a systematic review and meta-analysis
Source: PubMed Central journal article supplement — BMJ Open. 2021 Dec 13;11(12):e045880. doi: 10.1136/bmjopen-2020-045880 (PMC8671923; doi:10.1136/bmjopen-2020-045880), 2021-12-13
Supplement: bmjopen-2020-045880supp001.pdf [file bmjopen-2020-045880supp001.pdf]

**Supplementary file S1 – Search strategy****Medline - search**

1. exp Hypertension/ or hypertension.mp.
2. exp Hypertension/ or uncontrolled hypertension.mp.
3. exp Hypertension/ or uncontrolled blood pressure.mp.
4. high blood pressure.mp. or exp Hypertension/
5. 1 or 2 or 3 or 4
6. type 2 diabetes mellitus.mp. or exp Diabetes Mellitus, Type 2/
7. type 2 diabetes.mp. or exp Diabetes Mellitus, Type 2/
8. exp Diabetes Mellitus, Type 2/ or type II diabetes.mp.
9. dyslipidemia.mp. or exp Dyslipidemias/
10. exp Dyslipidemias/ or dyslipidimia.mp.
11. exp Dyslipidemias/ or dyslipidaemia.mp.
12. Hypercholesterolemia.mp. or exp Hypercholesterolemia/
13. Hypercholesterolaemia.mp. or exp Hypercholesterolemia/
14. Hypercholesterolimia.mp. [mp=title, abstract, original title, name of substance word, subject heading word, floating sub-heading word, keyword heading word, organism supplementary concept word, protocol supplementary concept word, rare disease supplementary concept word, unique identifier, synonyms]
15. hypertriglyceridemia.mp. or exp Hypertriglyceridemia/
16. exp Hypertriglyceridemia/ or hypertriglyceridaemia.mp.
17. hypertriglyceridimia.mp.
18. hyperlipidemia.mp. or exp Hyperlipidemias/
19. exp Hyperlipidemias/ or hyperlipidaemia.mp.
20. hyperlipidimia.mp.
21. obesity.mp. or exp Obesity/
22. chronic kidney disease.mp. or exp Renal Insufficiency, Chronic/
23. stroke.mp. or exp Stroke/
24. transient ischemic attack.mp. or exp Ischemic Attack, Transient/
25. Stroke/ or exp Ischemic Attack, Transient/ or transient ischaemic attack.mp.
26. coronary heart disease.mp. or exp Coronary Disease/
27. Heart failure.mp. or exp Heart Failure/
28. peripheral vascular disease.mp. or exp Peripheral Vascular Diseases/
29. atrial fibrillation.mp. or exp Atrial Fibrillation/
30. depression.mp. or exp Depression/
31. HIV/ or HIV.mp.
32. human immunodeficiency virus.mp. or exp HIV/
33. 6 or 7 or 8 or 9 or 10 or 11 or 12 or 13 or 14 or 15 or 16 or 17 or 18 or 19 or 20 or 21 or 22 or 23 or 24 or 25 or 26 or 27 or 28 or 29 or 30 or 31 or 32
34. (Angola or Benin or Botswana or "Burkina Faso" or "Upper Volta" or Burundi or Urundi or Cameroon or Cameroons or "Cape Verde" or "Central African Republic" or Chad or Comoros or "Comoro Islands" or Comores or Mayotte or Congo or Zaire or "Cote d'Ivoire" or "Ivory Coast" or ("Democratic Republic of the Congo" or Djibouti or "French Somaliland" or Eritrea or Ethiopia or Gabon or "Gabonese Republic" or Gambia or Ghana or "Gold Coast" or Guinea or Kenya or Lesotho or Basutoland or Liberia) or (Madagascar or "Malagasy Republic" or Malawi or Nyasaland or Mali or Mauritania or Mauritius or Mozambique or Namibia or Niger or Nigeria) or (Rwanda or "Sao Tome" or Seychelles or Senegal or "Sierra Leone" or Somalia or "South Africa" or Sudan or Swaziland or Tanzania or Togo or "Togolese Republic" or Uganda or Zambia or Zimbabwe or Rhodesia)).mp. [mp=title, abstract, original title, name of substance word, subject heading word, floating sub-heading word, keyword heading word, organism supplementary concept word, protocol supplementary concept word, rare disease supplementary concept word, unique identifier, synonyms]
35. sub-Saharan africa.mp. or exp "Africa South of the Sahara"/
36. subsaharan africa.mp. or exp "Africa South of the Sahara"/
37. 34 or 35 or 36
38. 5 and 33 and 37
39. limit 38 to (humans and yr="2000 - 2021")

**Embase - search**

1. hypertension.mp. or exp hypertension/
2. exp hypertension/ or uncontrolled hypertension.mp. or exp antihypertensive agent/
3. exp antihypertensive agent/ or exp hypertension/ or uncontrolled blood pressure.mp.
4. high blood pressure.mp. or exp hypertension/
5. 1 or 2 or 3 or 4
6. type 2 diabetes mellitus.mp. or exp non insulin dependent diabetes mellitus/
7. type 2 diabetes.mp. or exp non insulin dependent diabetes mellitus/
8. type II diabetes.mp. or exp non insulin dependent diabetes mellitus/
9. dyslipidemia.mp. or exp dyslipidemia/
10. dyslipidimia.mp.
11. dyslipidaemia.mp. or exp dyslipidemia/
12. exp hypercholesterolemia/ or Hypercholesterolemia.mp.
13. Hypercholesterolaemia.mp. or exp hypercholesterolemia/
14. Hypercholesterolimia.mp.
15. hypertriglyceridemia.mp. or exp hypertriglyceridemia/
16. hypertriglyceridaemia.mp. or exp hypertriglyceridemia/
17. hypertriglyceridimia.mp. or exp hypertriglyceridemia/
18. hyperlipidemia.mp. [mp=title, abstract, original title, name of substance word, subject heading word, floating sub-heading word, keyword heading word, organism supplementary concept word, protocol supplementary concept word, rare disease supplementary concept word, unique identifier, synonyms]
19. hyperlipidaemia.mp. [mp=title, abstract, original title, name of substance word, subject heading word, floating sub-heading word, keyword heading word, organism supplementary concept word, protocol supplementary concept word, rare disease supplementary concept word, unique identifier, synonyms]
20. hyperlipidimia.mp. [mp=title, abstract, original title, name of substance word, subject heading word, floating sub-heading word, keyword heading word, organism supplementary concept word, protocol supplementary concept word, rare disease supplementary concept word, unique identifier, synonyms]
21. obesity.mp. or exp obesity/
22. chronic kidney disease.mp. or exp chronic kidney failure/
23. stroke.mp. or exp cerebrovascular accident/
24. transient ischemic attack.mp. or exp transient ischemic attack/
25. transient ischaemic attack.mp. or exp transient ischemic attack/
26. coronary heart disease.mp. or exp ischemic heart disease/
27. Heart failure.mp. or exp heart failure/
28. peripheral vascular disease.mp. or exp peripheral vascular disease/
29. atrial fibrillation.mp. or exp atrial fibrillation/
30. exp depression/ or depression.mp.
31. HIV.mp. or exp Human immunodeficiency virus/
32. 6 or 7 or 8 or 9 or 10 or 11 or 12 or 13 or 14 or 15 or 16 or 17 or 21 or 22 or 23 or 24 or 25 or 26 or 27 or 28 or 29 or 30 or 31
33. (Angola or Benin or Botswana or "Burkina Faso" or "Upper Volta" or Burundi or Urundi or Cameroon or Camerouns or "Cape Verde" or "Central African Republic" or Chad or Comoros or "Comoro Islands" or Comores or Mayotte or Congo or Zaire or "Cote d'Ivoire" or "Ivory Coast" or ("Democratic Republic of the Congo" or Djibouti or "French Somaliland" or Eritrea or Ethiopia or Gabon or "Gabonese Republic" or Gambia or Ghana or "Gold Coast" or Guinea or Kenya or Lesotho or Basutoland or Liberia) or (Madagascar or "Malagasy Republic" or Malawi or Nyasaland or Mali or Mauritania or Mauritius or Mozambique or Namibia or Niger or Nigeria) or (Rwanda or "Sao Tome" or Seychelles or Senegal or "Sierra Leone" or Somalia or "South Africa" or Sudan or Swaziland or Tanzania or Togo or "Togolese Republic" or Uganda or Zambia or Zimbabwe or Rhodesia)).mp. [mp=title, abstract, original title, name of substance word, subject heading word, floating sub-heading word, keyword heading word, organism supplementary concept word, protocol supplementary concept word, rare disease supplementary concept word, unique identifier, synonyms]
34. sub-Saharan africa.mp. or exp "Africa south of the Sahara"/
35. subsaharan africa.mp. or exp "Africa south of the Sahara"/

36. 33 or 34 or 35  
 37. 5 and 32 and 36  
 38. limit 37 to (human and yr="2000 - 2021")

### Web of Science - search

|      |                  |                                                                                                                                                                                                                                                                                                                                                                                                                                                                                                                                                                                                                                                                                                                                                                                                                                                                                                                                                                            |                                                        |
|------|------------------|----------------------------------------------------------------------------------------------------------------------------------------------------------------------------------------------------------------------------------------------------------------------------------------------------------------------------------------------------------------------------------------------------------------------------------------------------------------------------------------------------------------------------------------------------------------------------------------------------------------------------------------------------------------------------------------------------------------------------------------------------------------------------------------------------------------------------------------------------------------------------------------------------------------------------------------------------------------------------|--------------------------------------------------------|
| # 38 | <b>2,114</b>     | #37 AND #33 AND #5<br><i>Indexes=SCI-EXPANDED, SSCI, A&amp;HCI, CPCI-S, CPCI-SSH, ESCI</i><br><i>Timespan=2000-2019</i>                                                                                                                                                                                                                                                                                                                                                                                                                                                                                                                                                                                                                                                                                                                                                                                                                                                    | Edit <input type="checkbox"/> <input type="checkbox"/> |
| # 37 | <b>421,085</b>   | #36 OR #35 OR #34<br><i>Indexes=SCI-EXPANDED, SSCI, A&amp;HCI, CPCI-S, CPCI-SSH, ESCI</i><br><i>Timespan=2000-2019</i>                                                                                                                                                                                                                                                                                                                                                                                                                                                                                                                                                                                                                                                                                                                                                                                                                                                     | Edit <input type="checkbox"/> <input type="checkbox"/> |
| # 36 | <b>301</b>       | TS=(sub-Saharan Africa)<br><i>Indexes=SCI-EXPANDED, SSCI, A&amp;HCI, CPCI-S, CPCI-SSH, ESCI</i><br><i>Timespan=2000-2019</i>                                                                                                                                                                                                                                                                                                                                                                                                                                                                                                                                                                                                                                                                                                                                                                                                                                               | Edit <input type="checkbox"/> <input type="checkbox"/> |
| # 35 | <b>33,673</b>    | TS=(sub-Saharan Africa)<br><i>Indexes=SCI-EXPANDED, SSCI, A&amp;HCI, CPCI-S, CPCI-SSH, ESCI</i><br><i>Timespan=2000-2019</i>                                                                                                                                                                                                                                                                                                                                                                                                                                                                                                                                                                                                                                                                                                                                                                                                                                               | Edit <input type="checkbox"/> <input type="checkbox"/> |
| # 34 | <b>407,520</b>   | TS=(Angola OR Benin OR Botswana OR "Burkina Faso" OR "Upper Volta" OR Burundi OR Urundi OR Cameroon OR Camerouns OR "Cape Verde" OR "Central African Republic" OR Chad OR Comoros OR "Comoro Islands" OR Comores OR Mayotte OR Congo OR Zaire OR "Cote d'Ivoire" OR "Ivory Coast" OR "Democratic Republic of the Congo" OR Djibouti OR "French Somaliland" OR Eritrea OR Ethiopia OR Gabon OR "Gabonese Republic" OR Gambia OR Ghana OR "Gold Coast" OR Guinea OR Kenya OR Lesotho OR Basutoland OR Liberia OR Madagascar OR "Malagasy Republic" OR Malawi OR Nyasaland OR Mali OR Mauritania OR Mauritius OR Mozambique OR Namibia OR Niger OR Nigeria OR Rwanda OR "Sao Tome" OR Seychelles OR Senegal OR "Sierra Leone" OR Somalia OR "South Africa" OR Sudan OR Swaziland OR Tanzania OR Togo OR "Togolese Republic" OR Uganda OR Zambia OR Zimbabwe OR Rhodesia)<br><i>Indexes=SCI-EXPANDED, SSCI, A&amp;HCI, CPCI-S, CPCI-SSH, ESCI</i><br><i>Timespan=2000-2019</i> | Edit <input type="checkbox"/> <input type="checkbox"/> |
| # 33 | <b>1,764,519</b> | #32 OR #31 OR #30 OR #29 OR #28 OR #27 OR #26 OR #25 OR #24 OR #23 OR #22 OR #21 OR #20 OR #19 OR #18 OR #17 OR #16 OR #15 OR #14 OR #13 OR #12 OR #11 OR #10 OR #9 OR #8 OR #7 OR #6<br><i>Indexes=SCI-EXPANDED, SSCI, A&amp;HCI, CPCI-S, CPCI-SSH, ESCI</i><br><i>Timespan=2000-2019</i>                                                                                                                                                                                                                                                                                                                                                                                                                                                                                                                                                                                                                                                                                 | Edit <input type="checkbox"/> <input type="checkbox"/> |
| # 32 | <b>85,771</b>    | TS=(Human immunodeficiency virus)<br><i>Indexes=SCI-EXPANDED, SSCI, A&amp;HCI, CPCI-S, CPCI-SSH, ESCI</i><br><i>Timespan=2000-2019</i>                                                                                                                                                                                                                                                                                                                                                                                                                                                                                                                                                                                                                                                                                                                                                                                                                                     | Edit <input type="checkbox"/> <input type="checkbox"/> |
| # 31 | <b>272,497</b>   | TS=(HIV)<br><i>Indexes=SCI-EXPANDED, SSCI, A&amp;HCI, CPCI-S, CPCI-SSH, ESCI</i><br><i>Timespan=2000-2019</i>                                                                                                                                                                                                                                                                                                                                                                                                                                                                                                                                                                                                                                                                                                                                                                                                                                                              | Edit <input type="checkbox"/> <input type="checkbox"/> |
| # 30 | <b>369,094</b>   | TS=(depression)                                                                                                                                                                                                                                                                                                                                                                                                                                                                                                                                                                                                                                                                                                                                                                                                                                                                                                                                                            | Edit <input type="checkbox"/> <input type="checkbox"/> |

|      |                | <i>Indexes=SCI-EXPANDED, SSCI, A&amp;HCI, CPCI-S, CPCI-SSH, ESCI</i>                                                                  |      |                                                   |
|------|----------------|---------------------------------------------------------------------------------------------------------------------------------------|------|---------------------------------------------------|
|      |                | <i>Timespan=2000-2019</i>                                                                                                             |      |                                                   |
| # 29 | <b>80,988</b>  | TS=(atrial fibrillation)<br><i>Indexes=SCI-EXPANDED, SSCI, A&amp;HCI, CPCI-S, CPCI-SSH, ESCI</i><br><i>Timespan=2000-2019</i>         | Edit | <input type="checkbox"/> <input type="checkbox"/> |
| # 28 | <b>20,886</b>  | TS=(peripheral vascular disease)<br><i>Indexes=SCI-EXPANDED, SSCI, A&amp;HCI, CPCI-S, CPCI-SSH, ESCI</i><br><i>Timespan=2000-2019</i> | Edit | <input type="checkbox"/> <input type="checkbox"/> |
| # 27 | <b>226,090</b> | TS=(heart failure)<br><i>Indexes=SCI-EXPANDED, SSCI, A&amp;HCI, CPCI-S, CPCI-SSH, ESCI</i><br><i>Timespan=2000-2019</i>               | Edit | <input type="checkbox"/> <input type="checkbox"/> |
| # 26 | <b>144,037</b> | TS=(coronary heart disease)<br><i>Indexes=SCI-EXPANDED, SSCI, A&amp;HCI, CPCI-S, CPCI-SSH, ESCI</i><br><i>Timespan=2000-2019</i>      | Edit | <input type="checkbox"/> <input type="checkbox"/> |
| # 25 | <b>1,959</b>   | TS=(transient ischaemic attack)<br><i>Indexes=SCI-EXPANDED, SSCI, A&amp;HCI, CPCI-S, CPCI-SSH, ESCI</i><br><i>Timespan=2000-2019</i>  | Edit | <input type="checkbox"/> <input type="checkbox"/> |
| # 24 | <b>11,095</b>  | TS=(transient ischemic attack)<br><i>Indexes=SCI-EXPANDED, SSCI, A&amp;HCI, CPCI-S, CPCI-SSH, ESCI</i><br><i>Timespan=2000-2019</i>   | Edit | <input type="checkbox"/> <input type="checkbox"/> |
| # 23 | <b>278,508</b> | TS=(stroke)<br><i>Indexes=SCI-EXPANDED, SSCI, A&amp;HCI, CPCI-S, CPCI-SSH, ESCI</i><br><i>Timespan=2000-2019</i>                      | Edit | <input type="checkbox"/> <input type="checkbox"/> |
| # 22 | <b>75,433</b>  | TS=(chronic kidney disease)<br><i>Indexes=SCI-EXPANDED, SSCI, A&amp;HCI, CPCI-S, CPCI-SSH, ESCI</i><br><i>Timespan=2000-2019</i>      | Edit | <input type="checkbox"/> <input type="checkbox"/> |
| # 21 | <b>280,562</b> | TS=(obesity)<br><i>Indexes=SCI-EXPANDED, SSCI, A&amp;HCI, CPCI-S, CPCI-SSH, ESCI</i><br><i>Timespan=2000-2019</i>                     | Edit | <input type="checkbox"/> <input type="checkbox"/> |
| # 20 | <b>5</b>       | TS=(hyperlipidimia)<br><i>Indexes=SCI-EXPANDED, SSCI, A&amp;HCI, CPCI-S, CPCI-SSH, ESCI</i><br><i>Timespan=2000-2019</i>              | Edit | <input type="checkbox"/> <input type="checkbox"/> |
| # 19 | <b>2,534</b>   | TS=(hyperlipidaemia)<br><i>Indexes=SCI-EXPANDED, SSCI, A&amp;HCI, CPCI-S, CPCI-SSH, ESCI</i><br><i>Timespan=2000-2019</i>             | Edit | <input type="checkbox"/> <input type="checkbox"/> |
| # 18 | <b>21,065</b>  | TS=(hyperlipidemia)<br><i>Indexes=SCI-EXPANDED, SSCI, A&amp;HCI, CPCI-S, CPCI-SSH, ESCI</i><br><i>Timespan=2000-2019</i>              | Edit | <input type="checkbox"/> <input type="checkbox"/> |
| # 17 | <b>2</b>       | TS=(hypertriglyceridimia)<br><i>Indexes=SCI-EXPANDED, SSCI, A&amp;HCI, CPCI-S, CPCI-SSH, ESCI</i><br><i>Timespan=2000-2019</i>        | Edit | <input type="checkbox"/> <input type="checkbox"/> |

|      |                |                                                                                                                                       |                                                        |
|------|----------------|---------------------------------------------------------------------------------------------------------------------------------------|--------------------------------------------------------|
| # 16 | <b>1,000</b>   | TS=(hypertriglyceridaemia)<br><i>Indexes=SCI-EXPANDED, SSCI, A&amp;HCI, CPCI-S, CPCI-SSH, ESCI</i><br><i>Timespan=2000-2019</i>       | Edit <input type="checkbox"/> <input type="checkbox"/> |
| # 15 | <b>8,591</b>   | TS=(hypertriglyceridemia)<br><i>Indexes=SCI-EXPANDED, SSCI, A&amp;HCI, CPCI-S, CPCI-SSH, ESCI</i><br><i>Timespan=2000-2019</i>        | Edit <input type="checkbox"/> <input type="checkbox"/> |
| # 14 | <b>0</b>       | TS=(hypercholesterolimia)<br><i>Indexes=SCI-EXPANDED, SSCI, A&amp;HCI, CPCI-S, CPCI-SSH, ESCI</i><br><i>Timespan=2000-2019</i>        | Edit <input type="checkbox"/> <input type="checkbox"/> |
| # 13 | <b>3,188</b>   | TS=(hypercholesterolaemia)<br><i>Indexes=SCI-EXPANDED, SSCI, A&amp;HCI, CPCI-S, CPCI-SSH, ESCI</i><br><i>Timespan=2000-2019</i>       | Edit <input type="checkbox"/> <input type="checkbox"/> |
| # 12 | <b>27,232</b>  | TS=(hypercholesterolemia)<br><i>Indexes=SCI-EXPANDED, SSCI, A&amp;HCI, CPCI-S, CPCI-SSH, ESCI</i><br><i>Timespan=2000-2019</i>        | Edit <input type="checkbox"/> <input type="checkbox"/> |
| # 11 | <b>4,539</b>   | TS=(dyslipidaemia)<br><i>Indexes=SCI-EXPANDED, SSCI, A&amp;HCI, CPCI-S, CPCI-SSH, ESCI</i><br><i>Timespan=2000-2019</i>               | Edit <input type="checkbox"/> <input type="checkbox"/> |
| # 10 | <b>6</b>       | TS=(dyslipidimia)<br><i>Indexes=SCI-EXPANDED, SSCI, A&amp;HCI, CPCI-S, CPCI-SSH, ESCI</i><br><i>Timespan=2000-2019</i>                | Edit <input type="checkbox"/> <input type="checkbox"/> |
| # 9  | <b>25,588</b>  | TS=(dyslipidemia)<br><i>Indexes=SCI-EXPANDED, SSCI, A&amp;HCI, CPCI-S, CPCI-SSH, ESCI</i><br><i>Timespan=2000-2019</i>                | Edit <input type="checkbox"/> <input type="checkbox"/> |
| # 8  | <b>16,630</b>  | TS=(type II diabetes)<br><i>Indexes=SCI-EXPANDED, SSCI, A&amp;HCI, CPCI-S, CPCI-SSH, ESCI</i><br><i>Timespan=2000-2019</i>            | Edit <input type="checkbox"/> <input type="checkbox"/> |
| # 7  | <b>173,805</b> | TS=(type 2 diabetes)<br><i>Indexes=SCI-EXPANDED, SSCI, A&amp;HCI, CPCI-S, CPCI-SSH, ESCI</i><br><i>Timespan=2000-2019</i>             | Edit <input type="checkbox"/> <input type="checkbox"/> |
| # 6  | <b>94,317</b>  | TS=(Type 2 diabetes mellitus)<br><i>Indexes=SCI-EXPANDED, SSCI, A&amp;HCI, CPCI-S, CPCI-SSH, ESCI</i><br><i>Timespan=2000-2019</i>    | Edit <input type="checkbox"/> <input type="checkbox"/> |
| # 5  | <b>375,418</b> | #4 OR #3 OR #2 OR #1<br><i>Indexes=SCI-EXPANDED, SSCI, A&amp;HCI, CPCI-S, CPCI-SSH, ESCI</i><br><i>Timespan=2000-2019</i>             | Edit <input type="checkbox"/> <input type="checkbox"/> |
| # 4  | <b>113,713</b> | TS=(high blood pressure)<br><i>Indexes=SCI-EXPANDED, SSCI, A&amp;HCI, CPCI-S, CPCI-SSH, ESCI</i><br><i>Timespan=2000-2019</i>         | Edit <input type="checkbox"/> <input type="checkbox"/> |
| # 3  | <b>3,503</b>   | TS=(uncontrolled blood pressure)<br><i>Indexes=SCI-EXPANDED, SSCI, A&amp;HCI, CPCI-S, CPCI-SSH, ESCI</i><br><i>Timespan=2000-2019</i> | Edit <input type="checkbox"/> <input type="checkbox"/> |

# 2 **4,063** TS=(uncontrolled hypertension) Edit    
*Indexes=SCI-EXPANDED, SSCI, A&HCI, CPCI-S, CPCI-SSH, ESCI*  
*Timespan=2000-2019*

# 1 **307,652** **TOPIC:** (hypertension)  
*Indexes=SCI-EXPANDED, SSCI, A&HCI, CPCI-S, CPCI-SSH, ESCI*  
*Timespan=2000-2019*

Table S1: List of 11 conditions included as comorbidity

|    | <b>Conditions</b>                                                     |
|----|-----------------------------------------------------------------------|
| 1  | Diabetes                                                              |
| 2  | Hypercholesterolemia/dyslipidemia/hyperlipidemia/hypertriglyceridemia |
| 3  | Obesity                                                               |
| 4  | Chronic kidney disease                                                |
| 5  | Stroke and or transient Ischemic attack                               |
| 6  | Coronary heart disease                                                |
| 7  | Heart failure                                                         |
| 8  | Peripheral vascular disease                                           |
| 9  | Atrial fibrillation                                                   |
| 10 | Depression                                                            |
| 11 | HIV                                                                   |

Table S2: Assessment of Risk of Bias (RoB)

|    | External validity                                                                             | Yes/No |   | Internal validity                                                                                        | Yes/No |
|----|-----------------------------------------------------------------------------------------------|--------|---|----------------------------------------------------------------------------------------------------------|--------|
| 1  | Was the target population representative of the population in relation to relevant variables? |        | 5 | Were data collected directly from the subjects (as opposed to a proxy)?                                  |        |
| 2  | Was the sampling frame a true or close representation of the target population?               |        | 6 | Was an acceptable case definition used in the study?                                                     |        |
| 3  | Was some form of random selection used to select the sample, OR was a census undertaken?      |        | 7 | Was the study instrument that measured the parameter of interest shown to have validity and reliability? |        |
| 4  | Was the likelihood of nonresponse bias minimal in the study?                                  |        | 8 | Was the same mode of data collection used for all subjects?                                              |        |
|    |                                                                                               |        | 9 | Were the numerator(s) and denominator(s) for the parameter of interest appropriate?                      |        |
| 10 | Summary item on the overall risk of study bias                                                |        |   |                                                                                                          |        |

*Adapted from Hoy D, Brooks P, Woolf A, Blyth F, March L, Bain C, et al. Assessing risk of bias in prevalence studies: modification of an existing tool and evidence of interrater agreement. Journal of clinical epidemiology. 2012;65(9):934-9.*

Table S3: Characteristics of studies in the prevalence of uncontrolled hypertension in sub-Saharan Africa

|                                            |                  |
|--------------------------------------------|------------------|
| Year of publication (n = 20)               | 2002-2020        |
| Period of inclusion (n = 20)               | 2000-2021        |
| Mean age, years (n = 20)                   | 56.8(±0.12)      |
| % of males (n = 20)                        | 41.8(±0.27)      |
|                                            |                  |
| <b>Comorbidities</b>                       | <b>N studies</b> |
| Diabetes                                   | 11               |
| HIV                                        | 5                |
| Stroke                                     | 2                |
| Atrial fibrillation                        | 1                |
| Chronic Kidney Disease (CKD)               | 1                |
| <b>sub-Saharan African regions</b>         |                  |
| Eastern Africa                             | 6                |
| Western Africa                             | 3                |
| Central Africa                             | 1                |
| Central Africa                             | 10               |
| <b>Study design</b>                        |                  |
| Cross sectional                            | 19               |
| Not reported                               | 1                |
| <b>Sampling</b>                            |                  |
| Consecutive                                | 16               |
| Random                                     | 2                |
| Not reported                               | 2                |
| <b>Timing of data collection</b>           |                  |
| Retrospectively                            | 5                |
| Prospectively                              | 14               |
| Not reported                               | 1                |
| <b>Data sources</b>                        |                  |
| Medical records                            | 5                |
| Participants                               | 11               |
| from both medical records and participants | 3                |
| Not reported                               | 1                |
| <b>Study site</b>                          |                  |
| Hospital                                   | 12               |
| Health Center                              | 8                |
| <b>Gross National Income (GNI)</b>         |                  |
| Below sub-Saharan Africa average           | 9                |
| Above sub-Saharan Africa average           | 11               |

Table 4: Meta-regression analysis for the variation of the prevalence of uncontrolled hypertension in people with comorbidity in SSA

| Variables (reference)                                           | Univariate analysis |              |                     |                    | Multivariate analysis |                     |
|-----------------------------------------------------------------|---------------------|--------------|---------------------|--------------------|-----------------------|---------------------|
|                                                                 | N studies           | P value      | Odds ratio (95% CI) | R <sup>2</sup> , % | P-value               | Odds ratio (95% CI) |
| <b>Year of publication (after 2015)</b>                         | 20                  | 0.595        | 0.96 (0.83; 1.11)   | 0.00               |                       |                     |
| <b>More females</b>                                             | 20                  | 0.172        | 0.09 (-0.04; 0.23)  | 11.35              |                       |                     |
| <b>Risk of bias (low)</b>                                       | 20                  |              |                     | 18.41              |                       |                     |
| Moderate                                                        |                     | 0.923        | 0.99 (0.76; 1.29)   |                    |                       |                     |
| High                                                            |                     | <b>0.080</b> | 1.22 (0.97; 1.53)   |                    |                       |                     |
| <b>Sample size (small studies)</b>                              | 20                  |              |                     | 0                  |                       |                     |
| Large studies                                                   |                     | 0.563        | 1.04 (0.90; 1.21)   |                    |                       |                     |
| <b>SSA regions (Eastern)</b>                                    | 20                  |              |                     | 0.00               |                       |                     |
| Western                                                         |                     | 0.636        | 0.95 (0.74; 1.21)   |                    |                       |                     |
| Central                                                         |                     | 0.747        | 1.06 (0.73; 1.53)   |                    |                       |                     |
| Southern                                                        |                     | 0.679        | 1.04 (0.87; 1.24)   |                    |                       |                     |
| <b>Comorbidities (atrial fibrillation)</b>                      | 20                  |              |                     | 3.50               |                       |                     |
| Chronic kidney disease                                          |                     | 0.222        | 0.78 (0.53; 1.16)   |                    |                       |                     |
| Diabetes                                                        |                     | 0.082        | 0.77 (0.58; 1.03)   |                    |                       |                     |
| HIV                                                             |                     | 0.097        | 0.75 (0.53; 1.06)   |                    |                       |                     |
| Stroke                                                          |                     | 0.119        | 0.76 (0.54; 1.08)   |                    |                       |                     |
| <b>Setting (Health center)</b>                                  | 20                  |              |                     | 0                  |                       |                     |
| Hospital                                                        |                     | 0.958        | 1.00 (0.86; 1.17)   |                    |                       |                     |
| <b>Sampling (Consecutive)</b>                                   | 18                  |              |                     | 0                  |                       |                     |
| Random                                                          |                     | 0.536        | 0.94 (0.75; 1.16)   |                    |                       |                     |
| <b>BP target used (recommended comorbidity target not used)</b> | 20                  |              |                     | 21.34              |                       |                     |
| Recommended BP control used                                     |                     | 0.111        | 0.90 (0.79; 1.03)   |                    |                       |                     |
| <b>GNI (Below SSA average)</b>                                  | 20                  |              |                     |                    |                       |                     |
| Above SSA average                                               |                     | 0.821        | 1.02 (0.88; 1.18)   | 0                  |                       |                     |

BP=Blood pressure



Table S5: Meta-regression analysis for the variation of the prevalence of uncontrolled hypertension in people with diabetes in SSA

| Variables (reference)                                           | Univariate analysis |              |                            |                    | Multivariate analysis |                               |
|-----------------------------------------------------------------|---------------------|--------------|----------------------------|--------------------|-----------------------|-------------------------------|
|                                                                 | N studies           | P value      | Coefficient (95% CI)       | R <sup>2</sup> , % | P value               | Adjusted coefficient (95% CI) |
| <b>Year of publication (after 2015)</b>                         | 11                  | 0.274        | 0.0793 (-0.0748; 0.2334)   | 18.20              |                       |                               |
| <b>More females</b>                                             | 11                  | 0.205        | 0.1157 (-0.0758; 0.3072)   | 16.26              |                       |                               |
| <b>Risk of bias (low)</b>                                       | 11                  |              |                            | -15.57             |                       |                               |
| Moderate                                                        |                     | 0.858        | -0.0278 (-0.3753; 0.3198)  |                    |                       |                               |
| High                                                            |                     | 0.688        | 0.0711 ( -0.3228; 0.4650)  |                    |                       |                               |
| <b>Sample size (small studies)</b>                              | 11                  |              |                            | -11.04             |                       |                               |
| Large studies                                                   |                     | 0.89         | .0115 (-0.1714; 0.1943)    |                    |                       |                               |
| <b>SSA regions (Eastern)</b>                                    | 11                  |              |                            | -18.36             |                       |                               |
| Western                                                         |                     | 0.815        | -.0341 (-0.3664; 0.2982)   |                    |                       |                               |
| Central                                                         |                     | 0.952        | .0101 (-0.3755; 0.3956)    |                    |                       |                               |
| Southern                                                        |                     | 0.500        | -0.0709 (-0.3067; 0.1649)  |                    |                       |                               |
| <b>Setting (Health center)</b>                                  | 11                  |              |                            | -15.43             |                       |                               |
| Hospital                                                        |                     | 0.860        | .0160 (-0.1825; 0.2144)    |                    |                       |                               |
| <b>Sampling (Consecutive)</b>                                   | 10                  |              |                            |                    |                       |                               |
| Random                                                          |                     | <b>0.001</b> | -0.2366 (-0.3477 -0.1255)  | 100.00             | <b>0.043</b>          | -0.1880 (-0.3686; -0.0074 )   |
| <b>BP target used (recommended diabetes BP target not used)</b> | 11                  |              |                            | 56.66              | 0.439                 | -0.0563 (-0.2188; 0.1062)     |
| Recommended diabetes BP control target used                     |                     | <b>0.054</b> | -0.1320 ( -0.2671; 0.0030) |                    |                       |                               |
| <b>GNI (Below SSA average)</b>                                  | 11                  |              |                            |                    |                       |                               |
| Above SSA average                                               |                     | 0.401        | -0.0633 ( -0.2256; 0.0991) | 3.10               |                       |                               |
| <b>Mean age</b>                                                 | 11                  | 0.296        | 0.0047 ( -.0046; 0.0139)   | -0.16              |                       |                               |

BP=Blood pressure
